# Supplementary material for: Filling the human resource gap through public-private partnership: Can private, community-based skilled birth attendants improve maternal health service utilization and health outcomes in a remote region of Bangladesh?
Source: PLoS One. 2020 Jan 17;15(1):e0226923. doi: 10.1371/journal.pone.0226923 (PMC6968857; doi:10.1371/journal.pone.0226923)
Supplement: S4 File — (XLSX) [file pone.0226923.s004.xlsx]

## Sheet: data
survey	age	religion	education	para	h_occupation	wealth_score	wealth_group	decided_delivery_place	Saved_money	emergency_transport	safe_delivery_kit	birth_preparedness_3	birth_preparedness_2	anc_providor	skill_anc_1	skill_anc_4	anc_complication	delivery_providor	delivery_facility	skill_delivery	del_complication	pnc_providor	skill_pnc_1	skill_pnc_24h	pnc_complication
Baseline	25	hindu	Primary(1-5 Class)	1	DL/R/VP/TW	1.92406	Middle	1	0	0	0	0	0	Doctor	1	1	0	TTBA	0	0	0		0	0	0
Baseline	20	islam	No formal education	4	Others	0.757716	Poorest	1	0	0	0	0	0		0	0	1	TBA	0	0	0		0	0	1
Baseline	27	islam	No formal education	4	Service/Overseas worker	2.07426	Middle	1	1	0	0	0	1	Doctor	1	0	1	TTBA	0	0	0	Doctor	1	0	1
Baseline	21	islam	Junior secondary(6-8 class)	1	Service/Overseas worker	3.0142	Richest	0	1	0	0	0	0	Doctor	1	0	1	TTBA	0	0	0	Nurse	1	1	1
Baseline	24	islam	Secondary & higher(9+ Class)	2	DL/R/VP/TW	3.02425	Richest	0	0	0	0	0	0		0	0	1	TTBA	0	0	0		0	0	0
Baseline	28	hindu	Secondary & higher(9+ Class)	2	Business	2.84032	Richest	1	0	0	0	0	0		0	0	1	TTBA	0	0	0		0	0	0
Baseline	25	islam	Primary(1-5 Class)	1	Farming/Fishing/SL	0.3927	Poorest	0	0	0	0	0	0	Doctor	1	1	0	TBA	0	0	0		0	0	0
Baseline	25	islam	Primary(1-5 Class)	2	Farming/Fishing/SL	1.17776	Poorer	1	0	0	0	0	0	Doctor	1	0	0	TBA	0	0	1	Drug Seller	0	0	1
Baseline	32	islam	Primary(1-5 Class)	6	DL/R/VP/TW	0.58691	Poorest	1	0	0	0	0	0	Nurse	1	0	0	TBA	0	0	0	Drug Seller	0	0	1
Baseline	31	islam	No formal education	4	DL/R/VP/TW	0.839195	Poorest	1	0	0	0	0	0	Nurse	1	0	1	TBA	0	0	1		0	0	0
Baseline	25	hindu	Primary(1-5 Class)	1	DL/R/VP/TW	1.96675	Middle	1	0	0	0	0	0	Nurse	1	0	0	TTBA	0	0	0		0	0	0
Baseline	18	islam	No formal education	1	Farming/Fishing/SL	2.29741	Richer	0	0	0	0	0	0	Doctor	1	0	1	TBA	0	0	1		0	0	0
Baseline	35	islam	No formal education	8	Farming/Fishing/SL	1.51495	Poorer	1	0	0	0	0	0		0	0	0	TBA	0	0	0		0	0	0
Baseline	25	hindu	Primary(1-5 Class)	3	Business	0.757716	Poorest	1	1	0	1	1	1		0	0	1	Others	0	0	0	Drug Seller	0	0	1
Baseline	24	islam	No formal education	5	Business	2.2036	Richer	1	0	0	0	0	0	Doctor	1	0	1	Others	0	0	0		0	0	1
Baseline	35	islam	Primary(1-5 Class)	4	Farming/Fishing/SL	1.74267	Middle	0	0	0	1	0	0		0	0	0	Others	0	0	0		0	0	1
Baseline	25	islam	No formal education	5	DL/R/VP/TW	0.357319	Poorest	0	0	0	0	0	0		0	0	0	TTBA	0	0	1		0	0	0
Baseline	30	islam	Primary(1-5 Class)	5	Farming/Fishing/SL	0.812897	Poorest	1	0	0	0	0	0		0	0	1	TBA	0	0	1		0	0	0
Baseline	22	islam	Junior secondary(6-8 class)	3	DL/R/VP/TW	0.315179	Poorest	1	0	0	0	0	0		0	0	1	TBA	0	0	1	Drug Seller	0	0	1
Baseline	22	islam	Primary(1-5 Class)	3	Farming/Fishing/SL	2.01735	Middle	0	0	0	0	0	0		0	0	1	Others	0	0	1	Drug Seller	0	0	1
Baseline	26	islam	No formal education	2	DL/R/VP/TW	0.814628	Poorest	1	1	1	0	1	1	Doctor	1	0	1	TBA	0	0	1		0	0	1
Baseline	24	hindu	Secondary & higher(9+ Class)	2	Business	2.50334	Richer	0	0	0	0	0	0	Doctor	1	0	1	Doctor	1	1	1	Doctor	1	1	0
Baseline	24	hindu	Secondary & higher(9+ Class)	2	Business	3.07111	Richest	0	0	0	0	0	0	Doctor	1	1	1	Nurse	1	1	0	Doctor	1	0	1
Baseline	25	islam	Primary(1-5 Class)	2	Farming/Fishing/SL	2.01735	Middle	1	0	0	0	0	0	Doctor	1	0	1	TTBA	0	0	1	Drug Seller	0	0	1
Baseline	21	islam	Primary(1-5 Class)	4	DL/R/VP/TW	2.07426	Middle	1	0	0	1	0	1	Doctor	1	1	1	TBA	0	0	0	Doctor	1	0	1
Baseline	28	islam	No formal education	2	Farming/Fishing/SL	2.3983	Richer	1	0	0	0	0	0	Doctor	1	0	1	TBA	0	0	1		0	0	1
Baseline	25	islam	Secondary & higher(9+ Class)	2	Service/Overseas worker	2.90691	Richest	0	1	0	1	0	1	Doctor	1	1	1	TBA	0	0	0	Drug Seller	0	0	1
Baseline	24	hindu	Primary(1-5 Class)	1	Farming/Fishing/SL	1.65233	Middle	0	1	0	0	0	0	Doctor	1	1	0	TTBA	0	0	1		0	0	1
Baseline	30	islam	No formal education	3	DL/R/VP/TW	1.331	Poorer	0	0	0	0	0	0	Drug Seller	0	0	1	Others	0	0	0		0	0	0
Baseline	20	islam	Secondary & higher(9+ Class)	1	Business	2.67837	Richest	1	0	0	0	0	0	Nurse	1	0	1	TBA	0	0	1	Drug Seller	0	0	1
Baseline	30	hindu	Primary(1-5 Class)	4	DL/R/VP/TW	0.355536	Poorest	0	1	0	0	0	0	Nurse	1	0	1	TBA	0	0	1		0	0	1
Baseline	35	hindu	No formal education	5	DL/R/VP/TW	1.04538	Poorer	0	0	0	0	0	0	Doctor	1	0	1	Doctor	1	1	1	Doctor	1	1	0
Baseline	20	hindu	Junior secondary(6-8 class)	1	Farming/Fishing/SL	2.22027	Richer	1	0	1	0	0	1	Doctor	1	1	0	TBA	0	0	0		0	0	0
Baseline	18	islam	Junior secondary(6-8 class)	1	Farming/Fishing/SL	0.58691	Poorest	1	0	0	0	0	0		0	0	1	TBA	0	0	1	Drug Seller	0	0	1
Baseline	30	islam	No formal education	4	Others	2.45521	Richer	1	0	0	0	0	0	Doctor	1	0	1	TBA	0	0	0		0	0	1
Baseline	24	islam	Secondary & higher(9+ Class)	3	Business	1.40573	Poorer	0	1	0	0	0	0	Doctor	1	0	1	TTBA	0	0	1	Doctor	1	1	1
Baseline	27	hindu	No formal education	3	Farming/Fishing/SL	1.43299	Poorer	1	0	0	0	0	0		0	0	0	TBA	0	0	0		0	0	0
Baseline	22	islam	No formal education	2	Farming/Fishing/SL	0.770867	Poorest	0	0	0	0	0	0	Doctor	1	0	1	TBA	0	0	0		0	0	0
Baseline	24	hindu	Junior secondary(6-8 class)	2	Farming/Fishing/SL	2.23084	Richer	0	0	0	0	0	0	Doctor	1	0	1	TTBA	0	0	1	Drug Seller	0	0	0
Baseline	21	islam	Junior secondary(6-8 class)	2	Farming/Fishing/SL	2.13421	Richer	1	1	0	0	0	1	CHCP	1	0	0	TBA	0	0	0		0	0	0
Baseline	26	islam	Secondary & higher(9+ Class)	3	Business	2.50756	Richer	0	0	0	1	0	0	Doctor	1	0	1	TTBA	0	0	1	Drug Seller	0	0	1
Baseline	20	islam	Primary(1-5 Class)	2	DL/R/VP/TW	0.58503	Poorest	0	0	0	0	0	0	Doctor	1	0	1	TBA	0	0	0		0	0	1
Baseline	22	islam	Primary(1-5 Class)	1	Business	2.33264	Richer	1	0	0	0	0	0	Doctor	1	1	0	Doctor	1	1	1		0	0	0
Baseline	40	islam	No formal education	7	Farming/Fishing/SL	0.84912	Poorest	0	0	0	0	0	0		0	0	0	TBA	0	0	0	Drug Seller	0	0	1
Baseline	42	islam	No formal education	5	DL/R/VP/TW	1.39085	Poorer	0	1	0	1	0	1		0	0	0	TBA	0	0	0	Drug Seller	0	0	1
Baseline	26	islam	Junior secondary(6-8 class)	3	Service/Overseas worker	2.45521	Richer	1	0	0	0	0	0	Doctor	1	0	0	TTBA	0	0	1		0	0	0
Baseline	25	islam	Primary(1-5 Class)	4	Farming/Fishing/SL	1.12085	Poorer	0	0	0	0	0	0	Other	0	0	1	TTBA	0	0	1	Drug Seller	0	0	1
Baseline	25	islam	No formal education	6	Service/Overseas worker	2.62121	Richest	1	0	0	0	0	0	Nurse	1	0	1	TBA	0	0	0	Nurse	1	1	0
Baseline	25	hindu	Secondary & higher(9+ Class)	2	Farming/Fishing/SL	1.75659	Middle	1	0	0	0	0	0	Other	0	0	1	Doctor	1	1	1	Doctor	1	1	1
Baseline	24	islam	Primary(1-5 Class)	6	Service/Overseas worker	2.12656	Richer	0	0	0	0	0	0		0	0	0	TTBA	0	0	0		0	0	1
Baseline	18	hindu	Junior secondary(6-8 class)	1	Business	0.606153	Poorest	1	1	0	0	0	1	Doctor	1	0	1	Doctor	1	1	1		0	0	0
Baseline	27	hindu	Primary(1-5 Class)	3	DL/R/VP/TW	0.3927	Poorest	0	0	0	0	0	0	Nurse	1	0	1	TBA	0	0	0		0	0	0
Baseline	21	islam	No formal education	1	DL/R/VP/TW	1.74561	Middle	0	0	0	0	0	0	Doctor	1	0	0	TBA	0	0	0		0	0	0
Baseline	20	islam	Primary(1-5 Class)	1	DL/R/VP/TW	1.40573	Poorer	0	0	0	0	0	0		0	0	1	TTBA	0	0	1	Drug Seller	0	0	1
Baseline	22	hindu	Primary(1-5 Class)	1	DL/R/VP/TW	2.59663	Richest	0	0	0	0	0	0		0	0	0	TTBA	0	0	0	Doctor	1	0	1
Baseline	22	hindu	Primary(1-5 Class)	2	DL/R/VP/TW	1.11912	Poorer	0	0	0	0	0	0	Doctor	1	0	1	Nurse	1	1	0	Nurse	1	1	1
Baseline	30	hindu	Secondary & higher(9+ Class)	2	Farming/Fishing/SL	2.93361	Richest	1	0	0	0	0	0	Nurse	1	0	1	TTBA	0	0	0		0	0	1
Baseline	26	islam	No formal education	3	DL/R/VP/TW	1.01	Poorer	1	0	0	0	0	0	Nurse	1	0	0	TBA	0	0	0		0	0	1
Baseline	22	hindu	Primary(1-5 Class)	2	DL/R/VP/TW	1.30481	Poorer	1	1	0	0	0	1	CHCP	1	0	1	TTBA	0	0	0	Drug Seller	0	0	1
Baseline	31	islam	No formal education	7	Business	2.81012	Richest	0	0	0	0	0	0	Nurse	1	0	0	TBA	0	0	1		0	0	0
Baseline	31	islam	Primary(1-5 Class)	5	DL/R/VP/TW	2.44098	Richer	1	0	1	0	0	1	Other	0	0	0	TBA	0	0	0		0	0	0
Baseline	26	islam	No formal education	6	Farming/Fishing/SL	0.215928	Poorest	1	1	0	0	0	1		0	0	1	Others	0	0	0		0	0	0
Baseline	36	hindu	No formal education	6	DL/R/VP/TW	1.12085	Poorer	1	0	0	0	0	0		0	0	1	Others	0	0	1		0	0	1
Baseline	25	hindu	No formal education	1	DL/R/VP/TW	0.309833	Poorest	0	1	0	0	0	0	Doctor	1	0	1	TBA	0	0	1	Drug Seller	0	0	1
Baseline	25	islam	No formal education	3	DL/R/VP/TW	0.73827	Poorest	0	1	1	0	0	1	Nurse	1	0	1	Nurse	1	1	1	Nurse	1	1	0
Baseline	18	islam	Junior secondary(6-8 class)	1	Farming/Fishing/SL	0.84912	Poorest	1	0	0	0	0	0		0	0	1	TBA	0	0	0		0	0	0
Baseline	22	islam	Junior secondary(6-8 class)	3	Farming/Fishing/SL	1.29571	Poorer	0	0	0	0	0	0	Drug Seller	0	0	1	Others	0	0	0		0	0	1
Baseline	35	islam	No formal education	6	Business	2.62937	Richest	1	1	0	0	0	1	Doctor	1	0	1	Others	0	0	1		0	0	1
Baseline	24	islam	Primary(1-5 Class)	3	DL/R/VP/TW	1.68576	Middle	1	1	0	0	0	1	Other	0	0	1	TBA	0	0	1	Drug Seller	0	0	1
Baseline	25	islam	Primary(1-5 Class)	3	Others	2.34023	Richer	1	0	0	0	0	0		0	0	0	TBA	0	0	0		0	0	0
Baseline	25	hindu	No formal education	1	Farming/Fishing/SL	2.28775	Richer	1	1	0	0	0	1	Doctor	1	0	0	Others	0	0	0		0	0	0
Baseline	30	islam	No formal education	4	Farming/Fishing/SL	2.46819	Richer	1	1	0	0	0	1	Doctor	1	0	1	Doctor	1	1	0	Doctor	1	1	0
Baseline	20	islam	Primary(1-5 Class)	1	DL/R/VP/TW	1.53764	Poorer	0	0	0	1	0	0	Other	1	0	1	Others	0	0	0		0	0	0
Baseline	29	islam	Secondary & higher(9+ Class)	3	Business	2.67837	Richest	1	0	0	0	0	0	Other	0	0	1	TBA	0	0	0	Drug Seller	0	0	1
Baseline	22	islam	No formal education	1	DL/R/VP/TW	0.757716	Poorest	1	0	0	0	0	0		0	0	0	TBA	0	0	0		0	0	0
Baseline	16	islam	Primary(1-5 Class)	2	DL/R/VP/TW	0.62905	Poorest	0	0	0	1	0	0	Other	0	0	1	Others	0	0	0		0	0	1
Baseline	27	islam	Primary(1-5 Class)	4	Farming/Fishing/SL	3.08138	Richest	1	0	0	0	0	0	Doctor	1	0	1	Drug Seller	0	0	1	Drug Seller	0	0	1
Baseline	20	islam	Secondary & higher(9+ Class)	1	Service/Overseas worker	2.40664	Richer	1	0	1	0	0	1	Doctor	1	1	1	TTBA	0	0	0	Drug Seller	0	0	1
Baseline	25	islam	No formal education	3	DL/R/VP/TW	0.58691	Poorest	1	0	0	0	0	0		0	0	1	TBA	0	0	0	Drug Seller	0	0	1
Baseline	22	islam	Primary(1-5 Class)	2	Farming/Fishing/SL	2.3477	Richer	1	0	0	0	0	0	CHCP	1	0	0	TTBA	0	0	1		0	0	0
Baseline	30	hindu	Primary(1-5 Class)	2	Farming/Fishing/SL	2.30501	Richer	0	0	0	0	0	0	CHCP	1	0	1	TBA	0	0	1		0	0	0
Baseline	20	islam	No formal education	1	DL/R/VP/TW	1.74561	Middle	1	0	0	0	0	0		0	0	0	TBA	0	0	0		0	0	0
Baseline	26	islam	Primary(1-5 Class)	3	Others	3.20879	Richest	0	0	0	0	0	0	Doctor	1	0	0	TBA	0	0	0		0	0	1
Baseline	25	hindu	No formal education	5	Others	0.950046	Poorer	0	0	0	0	0	0	Nurse	1	0	1	TBA	0	0	0		0	0	1
Baseline	29	islam	No formal education	5	DL/R/VP/TW	0.542897	Poorest	0	0	0	0	0	0	Other	0	0	1	TBA	0	0	1	Nurse	1	0	1
Baseline	32	islam	No formal education	7	DL/R/VP/TW	0.755835	Poorest	0	0	0	0	0	0		0	0	0	TBA	0	0	0		0	0	0
Baseline	21	islam	No formal education	1	Farming/Fishing/SL	0.720552	Poorest	0	0	0	0	0	0	Doctor	1	0	1	TBA	0	0	1	Drug Seller	0	0	1
Baseline	25	hindu	Primary(1-5 Class)	3	DL/R/VP/TW	0.757716	Poorest	1	1	1	0	1	1	Nurse	1	0	0	Doctor	1	1	0	Doctor	1	1	0
Baseline	35	islam	No formal education	2	Farming/Fishing/SL	2.21273	Richer	0	0	0	0	0	0		0	0	0	TBA	0	0	0		0	0	1
Baseline	32	islam	Primary(1-5 Class)	4	Farming/Fishing/SL	2.77324	Richest	1	1	1	0	1	1	Doctor	1	0	1	Nurse	1	1	1	Doctor	1	1	1
Baseline	26	islam	No formal education	6	DL/R/VP/TW	0.969326	Poorer	0	0	0	0	0	0	Doctor	1	0	1	TTBA	0	0	0	CHCP	1	0	1
Baseline	30	islam	Primary(1-5 Class)	5	Farming/Fishing/SL	0.186513	Poorest	1	1	0	0	0	1	Nurse	1	0	1	Others	0	0	0		0	0	1
Baseline	19	islam	Primary(1-5 Class)	1	DL/R/VP/TW	1.71329	Middle	0	0	0	0	0	0		0	0	0	TBA	0	0	1	Drug Seller	0	0	1
Baseline	31	islam	Primary(1-5 Class)	6	DL/R/VP/TW	1.12085	Poorer	1	0	0	0	0	0	Doctor	1	1	1	TBA	0	0	0	Doctor	1	1	0
Baseline	30	islam	Primary(1-5 Class)	2	Service/Overseas worker	0.695628	Poorest	1	0	0	1	0	1	Nurse	1	1	1	TTBA	0	0	1	Drug Seller	0	0	1
Baseline	28	islam	No formal education	4	DL/R/VP/TW	0.458244	Poorest	0	0	0	0	0	0		0	0	0	TBA	0	0	0	Drug Seller	0	0	0
Baseline	25	hindu	No formal education	3	DL/R/VP/TW	0.315179	Poorest	0	0	0	0	0	0	Other	0	0	1	TBA	0	0	0		0	0	1
Baseline	24	islam	Junior secondary(6-8 class)	2	Farming/Fishing/SL	2.61243	Richest	1	0	0	0	0	0	Doctor	1	0	1	TTBA	0	0	1	Drug Seller	0	0	1
Baseline	44	islam	No formal education	8	Farming/Fishing/SL	1.27032	Poorer	0	0	0	0	0	0	Doctor	1	0	0	Others	0	0	0	Doctor	1	0	0
Baseline	25	islam	Junior secondary(6-8 class)	2	Farming/Fishing/SL	2.30501	Richer	1	0	0	0	0	0		0	0	0	TBA	0	0	1		0	0	0
Baseline	22	islam	Secondary & higher(9+ Class)	2	Business	3.21758	Richest	0	1	0	0	0	0	Doctor	1	0	1	TBA	0	0	1	Doctor	1	1	1
Baseline	31	islam	No formal education	4	DL/R/VP/TW	0.189625	Poorest	1	1	0	0	0	1		0	0	1	TTBA	0	0	0		0	0	0
Baseline	22	hindu	Primary(1-5 Class)	1	DL/R/VP/TW	1.92406	Middle	0	0	0	0	0	0	Other	0	0	1	TBA	0	0	0		0	0	0
Baseline	34	islam	No formal education	4	DL/R/VP/TW	1.96986	Middle	0	0	0	0	0	0	Doctor	1	0	0	TBA	0	0	0		0	0	0
Baseline	25	islam	Primary(1-5 Class)	4	Business	0.856761	Poorest	1	0	0	0	0	0	Nurse	1	1	1	TBA	0	0	0	Other	0	0	1
Baseline	27	hindu	Primary(1-5 Class)	3	Business	2.01735	Middle	0	1	0	0	0	0	Doctor	1	1	1	TBA	0	0	1		0	0	0
Baseline	25	hindu	No formal education	4	Farming/Fishing/SL	0.364959	Poorest	1	0	0	0	0	0		0	0	1	TBA	0	0	0		0	0	0
Baseline	26	islam	Primary(1-5 Class)	3	Farming/Fishing/SL	1.19664	Poorer	1	1	0	0	0	1	Nurse	1	0	1	TBA	0	0	0		0	0	0
Baseline	35	islam	Primary(1-5 Class)	8	DL/R/VP/TW	0.58691	Poorest	1	1	1	0	1	1		0	0	0	TBA	0	0	0		0	0	0
Baseline	25	islam	Primary(1-5 Class)	4	Business	2.01735	Middle	0	0	0	0	0	0	Doctor	1	0	1	TBA	0	0	0	Other	0	0	1
Baseline	26	islam	Primary(1-5 Class)	3	Farming/Fishing/SL	2.3983	Richer	0	0	0	0	0	0	Doctor	1	0	0	TBA	0	0	0		0	0	0
Baseline	27	islam	No formal education	4	Business	1.78669	Middle	1	0	0	0	0	0	Other	0	0	1	TBA	0	0	1		0	0	0
Baseline	25	hindu	Junior secondary(6-8 class)	3	DL/R/VP/TW	1.02584	Poorer	0	0	0	0	0	0	Doctor	1	0	1	TTBA	0	0	1		0	0	1
Baseline	35	islam	No formal education	8	DL/R/VP/TW	0.438499	Poorest	0	0	0	0	0	0	Doctor	1	0	1	TTBA	0	0	0	Drug Seller	0	0	1
Baseline	30	islam	No formal education	3	Farming/Fishing/SL	0.414231	Poorest	0	0	0	0	0	0		0	0	1	TBA	0	0	0	Drug Seller	0	0	1
Baseline	20	islam	Primary(1-5 Class)	1	Farming/Fishing/SL	1.84932	Middle	0	0	0	0	0	0	Doctor	1	0	1	TTBA	0	0	1	Drug Seller	0	0	1
Baseline	30	islam	No formal education	2	DL/R/VP/TW	1.57481	Poorer	0	0	0	0	0	0	Drug Seller	0	0	1	TTBA	0	0	1	Other	0	0	0
Baseline	40	islam	No formal education	3	DL/R/VP/TW	1.96986	Middle	0	0	0	0	0	0	Doctor	1	0	1	TBA	0	0	0		0	0	1
Baseline	22	islam	No formal education	2	DL/R/VP/TW	1.74332	Middle	0	0	0	0	0	0		0	0	1	TBA	0	0	0		0	0	0
Baseline	22	hindu	Junior secondary(6-8 class)	1	Service/Overseas worker	1.74138	Middle	0	0	0	0	0	0	Other	0	0	1	TTBA	0	0	1	Doctor	1	0	1
Baseline	26	islam	Primary(1-5 Class)	5	Farming/Fishing/SL	1.07102	Poorer	0	0	0	0	0	0		0	0	0	TBA	0	0	0		0	0	1
Baseline	20	islam	No formal education	4	Business	0.410759	Poorest	1	0	0	0	0	0	Drug Seller	0	0	1	TBA	0	0	0		0	0	1
Baseline	32	islam	Junior secondary(6-8 class)	4	Farming/Fishing/SL	2.02738	Middle	0	0	0	0	0	0	Doctor	1	0	1	TBA	0	0	1		0	0	1
Baseline	26	islam	Primary(1-5 Class)	3	Business	2.61179	Richest	1	0	0	0	0	0	Doctor	1	0	1	TTBA	0	0	0		0	0	0
Baseline	21	islam	No formal education	4	DL/R/VP/TW	1.37141	Poorer	1	0	0	0	0	0		0	0	0	TBA	0	0	0		0	0	0
Baseline	21	islam	No formal education	2	DL/R/VP/TW	0.542897	Poorest	1	0	0	0	0	0		0	0	1	Others	0	0	1		0	0	1
Baseline	32	islam	No formal education	7	Business	1.20233	Poorer	0	0	0	0	0	0	Doctor	1	0	1	TTBA	0	0	1	Drug Seller	0	0	1
Baseline	32	islam	Junior secondary(6-8 class)	4	Others	2.566	Richer	1	0	0	0	0	0		0	0	0	TTBA	0	0	1		0	0	0
Baseline	40	islam	No formal education	6	Farming/Fishing/SL	0.70835	Poorest	0	0	0	0	0	0	Doctor	1	0	1	TBA	0	0	1		0	0	1
Baseline	27	islam	Junior secondary(6-8 class)	2	Service/Overseas worker	2.29741	Richer	1	0	0	0	0	0	Drug Seller	0	0	1	TTBA	0	0	0		0	0	1
Baseline	30	islam	No formal education	6	Business	2.45521	Richer	1	0	0	0	0	0		0	0	0	Others	0	0	0		0	0	0
Baseline	25	islam	No formal education	3	Farming/Fishing/SL	0.3927	Poorest	0	0	0	0	0	0	Drug Seller	0	0	1	TBA	0	0	1		0	0	1
Baseline	35	islam	No formal education	9	DL/R/VP/TW	0.3927	Poorest	0	0	0	0	0	0		0	0	0	TBA	0	0	0		0	0	0
Baseline	16	islam	Primary(1-5 Class)	1	DL/R/VP/TW	2.18	Richer	1	0	1	1	1	1		0	0	0	TBA	0	0	0		0	0	0
Baseline	26	islam	No formal education	3	Service/Overseas worker	2.67456	Richest	0	0	0	0	0	0	Doctor	1	0	0	TTBA	0	0	0		0	0	1
Baseline	26	islam	Secondary & higher(9+ Class)	2	Business	2.6687	Richest	1	1	1	0	1	1	Doctor	1	0	1	TBA	0	0	0	Drug Seller	0	0	0
Baseline	45	islam	No formal education	12	Service/Overseas worker	0.364959	Poorest	1	0	0	0	0	0		0	0	1	TBA	0	0	1		0	0	1
Baseline	24	islam	Primary(1-5 Class)	4	Business	0.58691	Poorest	0	0	0	0	0	0		0	0	0	Others	0	0	0	Drug Seller	0	0	1
Baseline	21	islam	Primary(1-5 Class)	2	DL/R/VP/TW	1.12085	Poorer	0	1	0	0	0	0		0	0	1	Others	0	0	1		0	0	1
Baseline	20	hindu	Primary(1-5 Class)	1	DL/R/VP/TW	1.42216	Poorer	0	1	0	0	0	0	Other	0	0	1	TBA	0	0	0	Nurse	1	0	0
Baseline	18	hindu	Junior secondary(6-8 class)	2	Business	2.39568	Richer	0	1	1	0	0	1	Doctor	1	0	1	TBA	0	0	0	Drug Seller	0	0	1
Baseline	26	islam	Primary(1-5 Class)	4	DL/R/VP/TW	2.22749	Richer	0	0	0	1	0	0		0	0	0	TTBA	0	0	1	Drug Seller	0	0	1
Baseline	27	islam	No formal education	2	DL/R/VP/TW	1.59247	Middle	1	1	0	1	1	1		0	0	0	TTBA	0	0	0	Drug Seller	0	0	1
Baseline	22	islam	No formal education	4	DL/R/VP/TW	0.315179	Poorest	0	0	0	0	0	0		0	0	0	Others	0	0	0		0	0	0
Baseline	35	islam	No formal education	6	Service/Overseas worker	2.03516	Middle	1	1	0	0	0	1	Doctor	1	0	1	TBA	0	0	1	Drug Seller	0	0	1
Baseline	23	hindu	Secondary & higher(9+ Class)	1	Business	2.61179	Richest	0	0	0	0	0	0	Doctor	1	1	1	Doctor	1	1	1	Doctor	1	1	0
Baseline	22	islam	No formal education	4	DL/R/VP/TW	0.186513	Poorest	0	0	0	0	0	0		0	0	0	Others	0	0	0	Drug Seller	0	0	1
Baseline	20	islam	Primary(1-5 Class)	1	DL/R/VP/TW	2.44098	Richer	1	1	1	0	1	1		0	0	0	TBA	0	0	0		0	0	0
Baseline	29	islam	No formal education	4	DL/R/VP/TW	1.11952	Poorer	1	1	0	0	0	1		0	0	1	Others	0	0	0	Drug Seller	0	0	1
Baseline	25	hindu	Primary(1-5 Class)	2	DL/R/VP/TW	1.43577	Poorer	1	1	0	0	0	1	Doctor	1	0	1	TBA	0	0	1		0	0	0
Baseline	25	islam	Primary(1-5 Class)	3	Business	2.15224	Richer	0	1	0	0	0	0		0	0	0	TBA	0	0	0		0	0	1
Baseline	30	islam	Primary(1-5 Class)	4	Business	2.28775	Richer	0	0	0	0	0	0	Doctor	1	0	1	TBA	0	0	0	Doctor	1	0	1
Baseline	30	hindu	Primary(1-5 Class)	3	Farming/Fishing/SL	1.04365	Poorer	0	0	0	0	0	0	Other	0	0	1	TBA	0	0	0	Drug Seller	0	0	1
Baseline	29	islam	Primary(1-5 Class)	3	Business	0.58691	Poorest	1	0	0	0	0	0	Doctor	1	0	1	TBA	0	0	1		0	0	1
Baseline	24	islam	Primary(1-5 Class)	3	DL/R/VP/TW	0.186513	Poorest	0	0	0	0	0	0		0	0	0	TTBA	0	0	0		0	0	0
Baseline	19	islam	No formal education	2	Farming/Fishing/SL	1.8539	Middle	0	1	1	1	1	1	Doctor	1	1	1	TBA	0	0	0	Doctor	1	1	1
Baseline	25	islam	Primary(1-5 Class)	1	Business	1.63345	Middle	0	1	0	0	0	0	Doctor	1	0	1	Nurse	1	1	1		0	0	0
Baseline	25	islam	Primary(1-5 Class)	3	Farming/Fishing/SL	1.98018	Middle	0	0	0	0	0	0	Doctor	1	0	1	TBA	0	0	0	Doctor	1	1	1
Baseline	35	islam	Primary(1-5 Class)	5	Farming/Fishing/SL	2.07426	Middle	1	0	0	0	0	0		0	0	0	Others	0	0	0		0	0	0
Baseline	25	hindu	No formal education	3	DL/R/VP/TW	1.79003	Middle	0	0	0	0	0	0	Doctor	1	1	1	TTBA	0	0	0	Doctor	1	1	0
Baseline	25	islam	Primary(1-5 Class)	3	Business	2.13421	Richer	1	0	0	0	0	0	Doctor	1	0	0	TBA	0	0	0	CHCP	1	0	1
Baseline	23	islam	Primary(1-5 Class)	4	DL/R/VP/TW	1.23771	Poorer	0	0	0	0	0	0	Nurse	1	0	1	TBA	0	0	0	Other	0	0	0
Baseline	20	islam	No formal education	3	Business	2.56314	Richer	0	0	0	0	0	0		0	0	1	TTBA	0	0	0		0	0	0
Baseline	27	islam	Junior secondary(6-8 class)	3	DL/R/VP/TW	2.35897	Richer	0	0	0	0	0	0	Nurse	1	1	0	TBA	0	0	1		0	0	0
Baseline	32	hindu	Junior secondary(6-8 class)	4	Service/Overseas worker	2.77375	Richest	1	1	0	0	0	1	Doctor	1	0	1	Nurse	1	1	1	Nurse	1	1	1
Baseline	22	islam	Primary(1-5 Class)	1	Farming/Fishing/SL	2.07426	Middle	0	1	0	0	0	0	Doctor	1	0	1	TTBA	0	0	0		0	0	0
Baseline	18	islam	No formal education	1	DL/R/VP/TW	0.357319	Poorest	1	0	0	0	0	0		0	0	0	TBA	0	0	0	Drug Seller	0	0	1
Baseline	30	hindu	No formal education	3	DL/R/VP/TW	0.6627	Poorest	0	0	0	0	0	0	Doctor	1	0	0	TTBA	0	0	1		0	0	0
Baseline	18	islam	No formal education	2	DL/R/VP/TW	0.3927	Poorest	0	0	0	0	0	0		0	0	0	TTBA	0	0	0		0	0	0
Baseline	25	hindu	No formal education	4	DL/R/VP/TW	0.456916	Poorest	1	1	0	0	0	1	Doctor	1	1	1	TBA	0	0	1		0	0	1
Baseline	24	islam	No formal education	2	DL/R/VP/TW	1.23771	Poorer	1	0	1	0	0	1	Other	0	0	0	TBA	0	0	0		0	0	0
Baseline	26	hindu	No formal education	2	DL/R/VP/TW	0.70484	Poorest	0	0	0	0	0	0	Doctor	1	0	0	TTBA	0	0	0	Doctor	1	1	1
Baseline	28	hindu	Primary(1-5 Class)	3	DL/R/VP/TW	1.26843	Poorer	0	0	0	0	0	0	Doctor	1	0	0	TBA	0	0	0		0	0	0
Baseline	29	islam	Primary(1-5 Class)	4	DL/R/VP/TW	1.17614	Poorer	0	0	0	0	0	0	Doctor	1	0	1	TBA	0	0	1	Drug Seller	0	0	1
Baseline	27	islam	No formal education	4	DL/R/VP/TW	0.812747	Poorest	0	0	0	0	0	0	Other	0	0	1	TBA	0	0	0		0	0	0
Baseline	22	islam	Primary(1-5 Class)	2	DL/R/VP/TW	2.21568	Richer	0	0	0	0	0	0		0	0	0	TBA	0	0	0		0	0	0
Baseline	22	islam	Junior secondary(6-8 class)	1	Farming/Fishing/SL	2.01735	Middle	1	0	0	0	0	0	Doctor	1	0	1	TBA	0	0	0		0	0	0
Baseline	33	islam	No formal education	5	Business	1.53937	Poorer	0	0	0	0	0	0		0	0	1	Others	0	0	1		0	0	0
Baseline	34	islam	No formal education	8	Business	1.24121	Poorer	1	0	0	0	0	0		0	0	1	Others	0	0	1		0	0	0
Baseline	18	islam	Junior secondary(6-8 class)	2	Others	2.34389	Richer	1	0	0	0	0	0	Other	0	0	1	TBA	0	0	1	Doctor	1	0	1
Baseline	32	islam	Primary(1-5 Class)	3	Farming/Fishing/SL	1.40573	Poorer	1	0	0	0	0	0	Drug Seller	0	0	0	TTBA	0	0	0		0	0	0
Baseline	21	islam	Junior secondary(6-8 class)	1	Service/Overseas worker	1.57654	Middle	1	0	0	0	0	0		0	0	1	TBA	0	0	0	Drug Seller	0	0	1
Baseline	30	hindu	Junior secondary(6-8 class)	3	Farming/Fishing/SL	1.59247	Middle	0	0	0	0	0	0	Other	0	0	0	TBA	0	0	0		0	0	0
Baseline	30	islam	No formal education	5	Business	1.82034	Middle	1	0	0	0	0	0		0	0	1	TBA	0	0	0		0	0	0
Baseline	16	islam	Primary(1-5 Class)	1	Service/Overseas worker	2.29741	Richer	1	0	0	0	0	0	Nurse	1	0	0	Nurse	1	1	1	Nurse	1	1	1
Baseline	25	hindu	No formal education	3	DL/R/VP/TW	0.795055	Poorest	0	0	0	0	0	0		0	0	0	Doctor	1	1	1	Doctor	1	1	1
Baseline	28	islam	No formal education	5	DL/R/VP/TW	0.528671	Poorest	1	0	0	0	0	0	Drug Seller	0	0	1	TBA	0	0	0	Drug Seller	0	0	1
Baseline	24	islam	No formal education	3	Business	1.68515	Middle	0	0	0	1	0	0	Drug Seller	0	0	1	TBA	0	0	1		0	0	1
Baseline	27	islam	Junior secondary(6-8 class)	3	Business	3.20423	Richest	0	1	0	0	0	0	Doctor	1	1	1	TTBA	0	0	0	Doctor	1	0	1
Baseline	25	hindu	Junior secondary(6-8 class)	2	DL/R/VP/TW	0.3927	Poorest	0	0	0	0	0	0	Drug Seller	0	0	0	TBA	0	0	0	Drug Seller	0	0	0
Baseline	26	islam	Junior secondary(6-8 class)	4	Others	0.366745	Poorest	0	0	0	0	0	0		0	0	1	TBA	0	0	1		0	0	1
Baseline	24	hindu	Primary(1-5 Class)	2	Others	1.84654	Middle	1	0	0	0	0	0	Doctor	1	1	1	Nurse	1	1	1	Nurse	1	1	0
Baseline	20	islam	Primary(1-5 Class)	1	DL/R/VP/TW	0.812747	Poorest	0	0	0	0	0	0	Other	0	0	1	Others	0	0	1		0	0	0
Baseline	30	islam	Junior secondary(6-8 class)	4	Business	2.99516	Richest	0	1	0	0	0	0	Doctor	1	0	1	TBA	0	0	0	Doctor	1	0	1
Baseline	18	islam	Primary(1-5 Class)	1	Farming/Fishing/SL	2.63154	Richest	1	1	0	0	0	1		0	0	0	TBA	0	0	1		0	0	0
Baseline	30	islam	Junior secondary(6-8 class)	3	DL/R/VP/TW	2.06003	Middle	1	0	1	0	0	1		0	0	0	TBA	0	0	0		0	0	0
Baseline	35	islam	No formal education	5	Farming/Fishing/SL	1.134	Poorer	0	0	0	0	0	0		0	0	1	TBA	0	0	0	Drug Seller	0	0	1
Baseline	38	islam	No formal education	9	Farming/Fishing/SL	1.32493	Poorer	1	0	0	0	0	0	Nurse	1	0	1	TBA	0	0	1		0	0	1
Baseline	20	islam	Primary(1-5 Class)	2	DL/R/VP/TW	0.186513	Poorest	1	0	0	1	0	1		0	0	1	TBA	0	0	0		0	0	0
Baseline	20	islam	Primary(1-5 Class)	1	Farming/Fishing/SL	2.78071	Richest	1	0	0	0	0	0	Doctor	1	1	1	Doctor	0	1	1	Doctor	1	0	1
Baseline	28	islam	No formal education	4	DL/R/VP/TW	0.839195	Poorest	1	0	0	0	0	0		0	0	1	TBA	0	0	0		0	0	1
Baseline	24	islam	No formal education	3	Farming/Fishing/SL	2.59663	Richest	1	0	0	0	0	0		0	0	1	TBA	0	0	0		0	0	0
Baseline	28	islam	No formal education	4	Business	2.18	Richer	0	0	0	0	0	0	Nurse	1	0	1	TTBA	0	0	1	Nurse	1	0	1
Baseline	18	hindu	Primary(1-5 Class)	1	Service/Overseas worker	2.61179	Richest	1	0	0	0	0	0	Doctor	1	1	1	Nurse	1	1	1		0	0	1
Baseline	25	islam	No formal education	2	DL/R/VP/TW	1.25381	Poorer	0	0	0	0	0	0	Nurse	1	0	1	TTBA	0	0	0	Drug Seller	0	0	1
Baseline	23	islam	Primary(1-5 Class)	2	DL/R/VP/TW	0.58691	Poorest	0	0	0	0	0	0		0	0	0	TTBA	0	0	1		0	0	1
Baseline	24	islam	Secondary & higher(9+ Class)	1	Service/Overseas worker	2.90476	Richest	1	1	0	0	0	1	Doctor	1	1	1	TTBA	0	0	1	Doctor	1	1	0
Baseline	26	islam	No formal education	1	DL/R/VP/TW	2.3249	Richer	0	0	0	0	0	0	CHCP	1	0	1	Doctor	1	1	0		0	0	0
Baseline	28	islam	No formal education	7	Business	0.82138	Poorest	0	0	0	0	0	0		0	0	1	TBA	0	0	0	Drug Seller	0	0	1
Baseline	28	islam	Primary(1-5 Class)	4	Business	0.630829	Poorest	1	1	0	0	0	1		0	0	0	TTBA	0	0	0		0	0	0
Baseline	29	islam	Primary(1-5 Class)	5	DL/R/VP/TW	1.30481	Poorer	0	0	0	0	0	0		0	0	1	TTBA	0	0	0	Drug Seller	0	0	1
Baseline	30	islam	No formal education	3	DL/R/VP/TW	0.923848	Poorer	0	1	0	0	0	0	Doctor	1	0	1	TTBA	0	0	1	Doctor	1	0	0
Baseline	22	islam	Secondary & higher(9+ Class)	1	Service/Overseas worker	1.80253	Middle	0	0	0	1	0	0	Doctor	1	0	1	TTBA	0	0	0	Doctor	1	0	1
Baseline	25	islam	No formal education	2	DL/R/VP/TW	1.87658	Middle	1	0	0	0	0	0		0	0	0	TBA	0	0	0	Drug Seller	0	0	1
Baseline	25	islam	No formal education	3	DL/R/VP/TW	0.58503	Poorest	1	0	0	0	0	0		0	0	0	TTBA	0	0	0		0	0	0
Baseline	30	islam	No formal education	6	Farming/Fishing/SL	0.315179	Poorest	1	0	0	0	0	0		0	0	0	TBA	0	0	0	Drug Seller	0	0	1
Baseline	36	islam	No formal education	10	DL/R/VP/TW	0.6627	Poorest	0	0	0	0	0	0		0	0	1	Others	0	0	1		0	0	0
Baseline	22	hindu	Secondary & higher(9+ Class)	1	Farming/Fishing/SL	1.92406	Middle	1	1	0	0	0	1	Doctor	1	0	1	Doctor	1	1	1		0	0	0
Baseline	25	islam	No formal education	3	Farming/Fishing/SL	2.42582	Richer	1	0	0	0	0	0		0	0	0	TBA	0	0	0		0	0	1
Baseline	29	hindu	Junior secondary(6-8 class)	3	DL/R/VP/TW	2.07426	Middle	1	1	0	0	0	1	Doctor	1	0	1	TBA	0	0	1	Drug Seller	0	0	1
Baseline	22	islam	Secondary & higher(9+ Class)	2	Business	2.23166	Richer	1	0	0	0	0	0	Doctor	1	1	0	TTBA	0	0	1	Doctor	1	0	1
Baseline	25	islam	Primary(1-5 Class)	3	Others	1.30481	Poorer	0	0	0	0	0	0	Drug Seller	0	0	0	TTBA	0	0	1	Doctor	1	0	1
Baseline	31	islam	Primary(1-5 Class)	5	Farming/Fishing/SL	2.01602	Middle	0	1	0	0	0	0	Doctor	1	0	1	TBA	0	0	1		0	0	1
Baseline	28	islam	No formal education	5	Farming/Fishing/SL	0.950046	Poorer	0	0	0	0	0	0		0	0	1	Others	0	0	0	Drug Seller	0	0	1
Baseline	25	islam	Primary(1-5 Class)	1	DL/R/VP/TW	1.86176	Middle	1	0	0	1	0	1		0	0	1	TBA	0	0	0		0	0	0
Baseline	27	islam	Secondary & higher(9+ Class)	4	DL/R/VP/TW	2.07426	Middle	1	1	0	0	0	1	Other	0	0	1	TBA	0	0	1		0	0	0
Baseline	22	islam	Primary(1-5 Class)	3	Farming/Fishing/SL	1.48325	Poorer	1	0	0	0	0	0		0	0	1	TTBA	0	0	0		0	0	0
Baseline	30	islam	No formal education	4	Farming/Fishing/SL	0.58503	Poorest	1	0	0	0	0	0		0	0	0	TBA	0	0	0		0	0	0
Baseline	20	hindu	Junior secondary(6-8 class)	1	Farming/Fishing/SL	1.63345	Middle	0	0	0	0	0	0		0	0	1	Others	0	0	1		0	0	0
Baseline	22	islam	Junior secondary(6-8 class)	1	DL/R/VP/TW	3.11825	Richest	0	1	0	0	0	0	Doctor	1	0	0	Doctor	1	1	0	Doctor	1	1	0
Baseline	30	islam	No formal education	7	DL/R/VP/TW	0.58503	Poorest	0	0	0	0	0	0		0	0	1	TBA	0	0	1		0	0	1
Baseline	17	islam	Primary(1-5 Class)	1	Farming/Fishing/SL	1.84654	Middle	0	0	0	0	0	0		0	0	0	TBA	0	0	0		0	0	0
Baseline	30	islam	Primary(1-5 Class)	4	DL/R/VP/TW	2.64592	Richest	1	0	0	0	0	0	Nurse	1	0	1	TBA	0	0	0	Doctor	1	1	1
Baseline	21	islam	No formal education	2	DL/R/VP/TW	0.315179	Poorest	1	0	0	0	0	0		0	0	1	TBA	0	0	0		0	0	0
Baseline	35	islam	No formal education	6	Farming/Fishing/SL	0.855037	Poorest	1	1	0	0	0	1	Doctor	1	0	1	TBA	0	0	1		0	0	1
Baseline	20	islam	Primary(1-5 Class)	2	Farming/Fishing/SL	2.43157	Richer	0	1	0	0	0	0	Other	0	0	1	TTBA	0	0	1	Drug Seller	0	0	1
Baseline	33	islam	No formal education	6	DL/R/VP/TW	0.23053	Poorest	1	0	0	0	0	0	Other	1	0	0	Others	0	0	0		0	0	0
Baseline	28	hindu	Primary(1-5 Class)	3	DL/R/VP/TW	0.678315	Poorest	0	0	0	0	0	0	Nurse	1	0	1	TBA	0	0	0		0	0	0
Baseline	25	hindu	Primary(1-5 Class)	1	DL/R/VP/TW	0.308051	Poorest	0	0	0	0	0	0		0	0	0	Others	0	0	0		0	0	0
Baseline	19	islam	Primary(1-5 Class)	1	DL/R/VP/TW	0.90256	Poorest	0	0	0	0	0	0	Nurse	1	0	0	TBA	0	0	0	Drug Seller	0	0	1
Baseline	22	islam	Secondary & higher(9+ Class)	1	Business	3.23412	Richest	1	1	0	0	0	1	Doctor	1	1	1	Doctor	1	1	1	Doctor	1	0	1
Baseline	20	islam	Primary(1-5 Class)	1	DL/R/VP/TW	2.3983	Richer	1	0	0	0	0	0		0	0	1	TBA	0	0	1		0	0	1
Baseline	21	islam	Primary(1-5 Class)	1	DL/R/VP/TW	0.488279	Poorest	0	0	0	0	0	0	Other	1	1	1	TBA	0	0	0	CHCP	1	0	1
Baseline	21	islam	No formal education	3	Farming/Fishing/SL	1.51417	Poorer	0	0	0	0	0	0		0	0	0	Others	0	0	0		0	0	0
Baseline	19	islam	No formal education	1	Farming/Fishing/SL	1.52594	Poorer	1	0	0	0	0	0		0	0	0	TTBA	0	0	0		0	0	0
Baseline	22	islam	Primary(1-5 Class)	3	Others	0.485985	Poorest	0	0	0	0	0	0	Nurse	1	0	1	TBA	0	0	0	Drug Seller	0	0	1
Baseline	20	islam	No formal education	3	Business	1.65233	Middle	1	0	0	0	0	0	Nurse	1	0	1	TBA	0	0	1		0	0	1
Baseline	30	islam	No formal education	2	DL/R/VP/TW	2.09883	Middle	1	0	0	0	0	0	Nurse	1	0	1	TBA	0	0	0	Drug Seller	0	0	1
Baseline	28	islam	No formal education	3	Business	1.40573	Poorer	0	0	0	0	0	0	Nurse	1	0	1	Drug Seller	0	0	1		0	0	1
Baseline	17	islam	Primary(1-5 Class)	1	Farming/Fishing/SL	0.755986	Poorest	1	1	0	0	0	1	Other	0	0	1	TBA	0	0	1		0	0	1
Baseline	25	islam	No formal education	4	DL/R/VP/TW	0.485985	Poorest	0	0	0	0	0	0		0	0	1	Others	0	0	0		0	0	1
Baseline	22	islam	No formal education	1	Farming/Fishing/SL	0.410759	Poorest	1	0	0	0	0	0	Nurse	1	0	1	TBA	0	0	0		0	0	0
Baseline	22	islam	No formal education	2	Farming/Fishing/SL	1.95911	Middle	1	1	0	0	0	1	Doctor	1	0	0	TBA	0	0	0		0	0	0
Baseline	22	hindu	Junior secondary(6-8 class)	1	Farming/Fishing/SL	1.48325	Poorer	1	1	0	0	0	1		0	0	0	TTBA	0	0	0		0	0	0
Baseline	20	islam	Primary(1-5 Class)	4	DL/R/VP/TW	0.601312	Poorest	1	0	0	0	0	0		0	0	1	TBA	0	0	0		0	0	0
Baseline	25	islam	No formal education	1	Service/Overseas worker	0.458244	Poorest	0	0	0	0	0	0		0	0	1	Doctor	1	1	1	Doctor	1	1	1
Baseline	24	hindu	Secondary & higher(9+ Class)	1	Service/Overseas worker	2.96555	Richest	0	1	0	0	0	0	Doctor	1	0	1	Doctor	1	1	1	Doctor	1	1	0
Baseline	20	islam	Primary(1-5 Class)	1	DL/R/VP/TW	1.7883	Middle	0	0	0	0	0	0	Doctor	1	0	1	TTBA	0	0	1	Drug Seller	0	0	1
Baseline	26	hindu	Junior secondary(6-8 class)	2	Farming/Fishing/SL	1.42501	Poorer	0	0	0	0	0	0	Doctor	1	0	0	TTBA	0	0	0	Other	0	0	1
Baseline	35	islam	No formal education	5	Business	2.2809	Richer	1	0	0	0	0	0	Doctor	1	0	1	TBA	0	0	0		0	0	1
Baseline	27	islam	Primary(1-5 Class)	3	DL/R/VP/TW	1.95911	Middle	0	0	0	1	0	0	Doctor	1	0	1	TTBA	0	0	0	Drug Seller	0	0	1
Baseline	20	hindu	Primary(1-5 Class)	1	Others	2.59532	Richest	1	1	0	0	0	1		0	0	0	TBA	0	0	0		0	0	0
Baseline	35	islam	No formal education	5	Farming/Fishing/SL	0.770867	Poorest	1	0	0	0	0	0		0	0	1	TTBA	0	0	1	Drug Seller	0	0	1
Baseline	25	hindu	Secondary & higher(9+ Class)	3	Farming/Fishing/SL	2.81012	Richest	1	0	0	0	0	0		0	0	1	Drug Seller	0	0	1	Other	0	0	1
Baseline	20	islam	Secondary & higher(9+ Class)	1	Service/Overseas worker	2.8925	Richest	1	0	0	0	0	0	Nurse	1	1	1	TTBA	0	0	0	Drug Seller	0	0	1
Baseline	32	islam	Junior secondary(6-8 class)	5	Farming/Fishing/SL	2.34006	Richer	1	1	0	0	0	1	Drug Seller	0	0	1	Nurse	1	1	1		0	0	1
Baseline	34	hindu	No formal education	5	Others	1.84654	Middle	0	0	0	0	0	0	Doctor	1	0	1	TBA	0	0	1		0	0	1
Baseline	32	hindu	Primary(1-5 Class)	1	Business	0.664431	Poorest	1	0	0	0	0	0	Nurse	1	0	1	Nurse	1	1	1	Nurse	1	1	0
Baseline	30	hindu	Junior secondary(6-8 class)	3	Business	0.934431	Poorer	1	0	1	0	0	1	Doctor	1	0	1	Doctor	1	1	1		0	0	0
Baseline	33	islam	Primary(1-5 Class)	5	Farming/Fishing/SL	2.43447	Richer	1	0	0	0	0	0		0	0	0	TBA	0	0	0		0	0	0
Baseline	18	islam	Junior secondary(6-8 class)	1	DL/R/VP/TW	2.01254	Middle	1	0	0	0	0	0		0	0	1	TBA	0	0	1		0	0	1
Baseline	15	islam	No formal education	1	Farming/Fishing/SL	0.221894	Poorest	0	0	0	0	0	0		0	0	1	Others	0	0	1		0	0	0
Baseline	18	islam	No formal education	1	Others	1.5018	Poorer	0	0	0	0	0	0	Other	0	0	1	TTBA	0	0	0	Drug Seller	0	0	1
Baseline	36	islam	No formal education	6	DL/R/VP/TW	1.36857	Poorer	0	0	1	0	0	0		0	0	0	TBA	0	0	0		0	0	1
Baseline	25	hindu	Primary(1-5 Class)	2	Farming/Fishing/SL	2.47102	Richer	0	0	0	0	0	0	Doctor	1	0	1	TTBA	0	0	1		0	0	1
Baseline	25	islam	Primary(1-5 Class)	5	DL/R/VP/TW	2.96555	Richest	1	1	0	0	0	1	Nurse	1	1	1	Nurse	1	1	1	Nurse	1	1	0
Baseline	21	islam	Primary(1-5 Class)	1	Farming/Fishing/SL	2.22749	Richer	1	0	0	0	0	0		0	0	1	TTBA	0	0	0		0	0	0
Baseline	30	islam	No formal education	3	DL/R/VP/TW	0.918495	Poorest	1	0	0	0	0	0		0	0	0	TTBA	0	0	0		0	0	0
Baseline	28	islam	No formal education	3	DL/R/VP/TW	1.02772	Poorer	1	0	0	0	0	0	Other	0	0	0	TTBA	0	0	0	Drug Seller	0	0	1
Baseline	32	islam	Secondary & higher(9+ Class)	4	Others	3.35131	Richest	0	0	0	0	0	0	Doctor	1	0	1	TTBA	0	0	0		0	0	0
Baseline	30	islam	No formal education	5	Farming/Fishing/SL	0.485985	Poorest	0	0	0	0	0	0	Doctor	1	0	1	TTBA	0	0	0		0	0	0
Baseline	28	islam	Primary(1-5 Class)	3	DL/R/VP/TW	1.57654	Middle	1	0	0	0	0	0		0	0	1	TBA	0	0	1		0	0	0
Baseline	24	islam	Primary(1-5 Class)	2	Farming/Fishing/SL	1.64636	Middle	0	1	0	0	0	0	Other	1	0	1	TBA	0	0	0		0	0	0
Baseline	30	islam	No formal education	7	Farming/Fishing/SL	1.54822	Poorer	0	0	0	0	0	0	Other	0	0	1	Others	0	0	0		0	0	1
Baseline	19	islam	Primary(1-5 Class)	1	DL/R/VP/TW	0.801635	Poorest	1	1	1	0	1	1	Doctor	1	0	1	TBA	0	0	0		0	0	0
Baseline	23	hindu	Primary(1-5 Class)	1	Farming/Fishing/SL	2.01735	Middle	1	1	0	0	0	1	Doctor	1	0	0	TBA	0	0	0		0	0	0
Baseline	23	islam	Primary(1-5 Class)	2	Farming/Fishing/SL	3.08575	Richest	1	1	0	0	0	1	Doctor	1	0	1	TBA	0	0	0	Doctor	1	1	1
Baseline	38	islam	No formal education	9	DL/R/VP/TW	0.916716	Poorest	1	0	0	0	0	0		0	0	0	TBA	0	0	0		0	0	0
Baseline	28	islam	No formal education	5	DL/R/VP/TW	0.186513	Poorest	0	1	0	1	0	1		0	0	1	TBA	0	0	0	Other	0	0	1
Baseline	32	islam	Primary(1-5 Class)	5	Business	2.35334	Richer	1	0	0	0	0	0	Doctor	1	0	1	TTBA	0	0	0		0	0	0
Baseline	20	islam	Primary(1-5 Class)	1	DL/R/VP/TW	0.950046	Poorer	1	1	0	0	0	1	CHCP	1	0	1	TBA	0	0	0		0	0	0
Baseline	20	islam	Primary(1-5 Class)	1	Service/Overseas worker	1.57947	Middle	0	0	0	0	0	0	Doctor	1	0	1	TBA	0	0	1	Drug Seller	0	0	1
Baseline	30	islam	No formal education	3	DL/R/VP/TW	0.3927	Poorest	0	1	0	0	0	0	Nurse	1	0	1	TBA	0	0	0		0	0	0
Baseline	35	islam	No formal education	7	Farming/Fishing/SL	1.96236	Middle	0	0	0	0	0	0		0	0	0	TBA	0	0	0		0	0	0
Baseline	23	islam	Primary(1-5 Class)	2	Farming/Fishing/SL	2.13755	Richer	0	0	0	0	0	0	Doctor	1	0	0	TBA	0	0	1		0	0	1
Baseline	20	islam	Primary(1-5 Class)	2	DL/R/VP/TW	2.33064	Richer	0	0	0	0	0	0		0	0	0	TBA	0	0	0		0	0	1
Baseline	28	hindu	No formal education	2	DL/R/VP/TW	0.84912	Poorest	0	0	0	0	0	0	Doctor	1	0	1	TTBA	0	0	0	Nurse	1	1	0
Baseline	28	hindu	No formal education	3	DL/R/VP/TW	0.438499	Poorest	0	0	0	0	0	0	Drug Seller	0	0	1	TTBA	0	0	0		0	0	0
Baseline	20	islam	Primary(1-5 Class)	2	DL/R/VP/TW	2.01735	Middle	1	1	0	0	0	1	Nurse	1	0	1	TBA	0	0	1		0	0	1
Baseline	27	islam	No formal education	4	Farming/Fishing/SL	1.95911	Middle	1	0	0	0	0	0		0	0	0	TBA	0	0	0		0	0	0
Baseline	22	islam	Primary(1-5 Class)	1	DL/R/VP/TW	1.40332	Poorer	0	0	0	0	0	0	Doctor	1	0	1	TTBA	0	0	0		0	0	0
Baseline	32	hindu	Secondary & higher(9+ Class)	3	Business	3.10309	Richest	1	1	0	0	0	1	Nurse	1	0	0	Doctor	1	1	0	Doctor	1	1	0
Baseline	20	islam	Primary(1-5 Class)	1	Farming/Fishing/SL	2.3983	Richer	0	0	0	0	0	0	Doctor	1	0	1	Others	0	0	0	Doctor	1	1	1
Baseline	23	islam	No formal education	4	Farming/Fishing/SL	2.26817	Richer	0	0	0	0	0	0	Doctor	1	1	0	TBA	0	0	0		0	0	0
Baseline	38	islam	No formal education	9	Others	1.69674	Middle	0	0	0	0	0	0		0	0	0	TBA	0	0	0		0	0	0
Baseline	21	hindu	Primary(1-5 Class)	2	Service/Overseas worker	3.17904	Richest	0	0	0	0	0	0	CHCP	1	0	0	Others	0	0	0		0	0	1
Baseline	20	hindu	Primary(1-5 Class)	1	Farming/Fishing/SL	0.913672	Poorest	1	0	0	0	0	0	Nurse	1	0	1	Doctor	1	1	1	Doctor	1	0	1
Baseline	22	islam	No formal education	2	DL/R/VP/TW	0.84912	Poorest	0	0	0	0	0	0	Doctor	1	0	0	TBA	0	0	0		0	0	0
Baseline	28	islam	No formal education	4	Business	2.3983	Richer	1	0	0	0	0	0	Doctor	1	0	1	TTBA	0	0	1	Nurse	1	1	1
Baseline	25	islam	No formal education	3	DL/R/VP/TW	0.186513	Poorest	1	0	0	0	0	0		0	0	1	TBA	0	0	1		0	0	1
Baseline	20	hindu	Junior secondary(6-8 class)	1	Business	1.13867	Poorer	1	0	0	1	0	1	Drug Seller	0	0	0	TBA	0	0	0		0	0	0
Baseline	35	islam	No formal education	7	Farming/Fishing/SL	2.3983	Richer	0	0	0	0	0	0	Doctor	1	0	1	TBA	0	0	0		0	0	0
Baseline	38	islam	No formal education	7	DL/R/VP/TW	0.264034	Poorest	1	0	0	0	0	0		0	0	1	TTBA	0	0	1		0	0	0
Baseline	28	islam	No formal education	4	Farming/Fishing/SL	2.12656	Richer	0	0	0	0	0	0	Doctor	1	0	1	TBA	0	0	1	Drug Seller	0	0	1
Baseline	38	islam	Primary(1-5 Class)	6	DL/R/VP/TW	1.12085	Poorer	1	0	0	0	0	0	Doctor	1	1	1	TBA	0	0	1		0	0	0
Baseline	30	islam	No formal education	6	DL/R/VP/TW	1.57481	Poorer	1	0	0	0	0	0		0	0	0	TBA	0	0	0		0	0	0
Baseline	25	islam	Primary(1-5 Class)	4	Farming/Fishing/SL	0.567464	Poorest	1	0	0	0	0	0	Nurse	1	0	1	TBA	0	0	0		0	0	1
Baseline	26	islam	Primary(1-5 Class)	2	DL/R/VP/TW	1.46264	Poorer	0	0	0	0	0	0		0	0	1	TBA	0	0	0		0	0	0
Baseline	25	islam	No formal education	2	Business	1.50342	Poorer	0	0	0	0	0	0	Doctor	1	0	0	TTBA	0	0	0	Other	0	0	0
Baseline	27	islam	Secondary & higher(9+ Class)	3	Business	3.12966	Richest	1	0	0	0	0	0	Doctor	1	0	1	TTBA	0	0	0	Drug Seller	0	0	1
Baseline	26	islam	Secondary & higher(9+ Class)	3	Business	2.81012	Richest	1	0	1	0	0	1	Drug Seller	0	0	0	TBA	0	0	0		0	0	0
Baseline	25	hindu	Secondary & higher(9+ Class)	2	DL/R/VP/TW	0.493625	Poorest	0	1	0	0	0	0	Doctor	1	0	1	TBA	0	0	1		0	0	0
Baseline	20	islam	Primary(1-5 Class)	1	DL/R/VP/TW	1.70577	Middle	1	0	0	0	0	0	Doctor	1	0	0	TTBA	0	0	1		0	0	0
Baseline	20	islam	Primary(1-5 Class)	1	DL/R/VP/TW	1.95911	Middle	1	0	0	0	0	0	Doctor	1	1	0	TBA	0	0	0	Doctor	1	1	1
Baseline	22	islam	Primary(1-5 Class)	1	DL/R/VP/TW	1.30481	Poorer	1	0	0	0	0	0	Nurse	1	0	1	TBA	0	0	1		0	0	1
Baseline	24	islam	Primary(1-5 Class)	3	Others	0.757716	Poorest	0	0	0	0	0	0	Drug Seller	0	0	0	TBA	0	0	0		0	0	0
Baseline	22	islam	Primary(1-5 Class)	2	DL/R/VP/TW	1.47258	Poorer	0	0	0	0	0	0	Drug Seller	0	0	1	PCSBA	0	1	1		0	0	0
Baseline	40	islam	No formal education	8	Farming/Fishing/SL	0.448821	Poorest	0	0	0	0	0	0	Other	0	0	0	TBA	0	0	0		0	0	1
Baseline	26	islam	No formal education	4	DL/R/VP/TW	0.866936	Poorest	0	0	0	1	0	0		0	0	0	TBA	0	0	0	Drug Seller	0	0	1
Baseline	31	islam	No formal education	6	DL/R/VP/TW	1.78669	Middle	1	0	0	0	0	0		0	0	1	TBA	0	0	0		0	0	0
Baseline	21	islam	Primary(1-5 Class)	3	Farming/Fishing/SL	1.36172	Poorer	1	0	0	0	0	0		0	0	0	TBA	0	0	0		0	0	0
Baseline	29	islam	No formal education	5	Business	1.28993	Poorer	0	0	0	0	0	0	Drug Seller	0	0	1	TBA	0	0	0		0	0	0
Baseline	33	islam	No formal education	3	DL/R/VP/TW	0.596337	Poorest	0	0	0	0	0	0	Doctor	1	0	1	TBA	0	0	1		0	0	0
Baseline	26	islam	No formal education	2	Farming/Fishing/SL	1.56166	Poorer	1	0	0	0	0	0		0	0	0	TBA	0	0	0		0	0	0
Baseline	20	islam	No formal education	1	Farming/Fishing/SL	1.17776	Poorer	0	0	0	0	0	0	Doctor	1	0	1	TTBA	0	0	1		0	0	1
Baseline	21	islam	No formal education	3	Farming/Fishing/SL	0.967861	Poorer	1	0	0	0	0	0	Other	0	0	0	TBA	0	0	0	Drug Seller	0	0	1
Baseline	29	islam	No formal education	6	DL/R/VP/TW	1.02757	Poorer	1	0	0	0	0	0	Doctor	1	0	1	TBA	0	0	1		0	0	0
Baseline	22	hindu	No formal education	1	Service/Overseas worker	1.57481	Poorer	0	1	0	0	0	0	Doctor	1	0	1	TTBA	0	0	1		0	0	0
Baseline	30	islam	No formal education	4	DL/R/VP/TW	0.357319	Poorest	1	0	0	0	0	0		0	0	0	TTBA	0	0	0		0	0	0
Baseline	30	islam	No formal education	5	Service/Overseas worker	2.99516	Richest	0	0	0	1	0	0	Doctor	1	0	1	TTBA	0	0	0		0	0	0
Baseline	22	islam	No formal education	3	DL/R/VP/TW	1.86263	Middle	1	1	0	0	0	1	Other	0	0	0	TBA	0	0	0	Drug Seller	0	0	1
Baseline	27	hindu	Secondary & higher(9+ Class)	2	Others	2.48273	Richer	0	0	0	0	0	0	CHCP	1	0	0	TTBA	0	0	0		0	0	0
Baseline	22	islam	Primary(1-5 Class)	3	Farming/Fishing/SL	1.53199	Poorer	1	0	0	0	0	0	Nurse	1	0	1	TTBA	0	0	0	Nurse	1	1	0
Baseline	25	islam	Primary(1-5 Class)	4	DL/R/VP/TW	0.364959	Poorest	1	0	0	0	0	0		0	0	0	TBA	0	0	0		0	0	0
Baseline	24	islam	Primary(1-5 Class)	1	DL/R/VP/TW	1.1937	Poorer	0	0	0	0	0	0	Other	0	0	1	Nurse	1	1	1	Nurse	1	1	1
Baseline	23	islam	Primary(1-5 Class)	3	Service/Overseas worker	2.16188	Richer	1	1	0	0	0	1		0	0	0	TBA	0	0	1	Nurse	1	1	1
Baseline	28	hindu	Primary(1-5 Class)	2	Farming/Fishing/SL	1.90623	Middle	1	0	1	0	0	1		0	0	1	TTBA	0	0	0	Drug Seller	0	0	0
Baseline	22	hindu	No formal education	5	Farming/Fishing/SL	1.02584	Poorer	1	0	0	0	0	0	Other	0	0	1	TBA	0	0	0	Doctor	1	0	1
Baseline	23	hindu	Secondary & higher(9+ Class)	1	Farming/Fishing/SL	2.59663	Richest	0	0	0	0	0	0		0	0	0	TTBA	0	0	0		0	0	0
Baseline	30	hindu	Primary(1-5 Class)	2	Farming/Fishing/SL	2.5185	Richer	0	0	0	0	0	0	Doctor	1	1	1	TBA	0	0	0	Drug Seller	0	0	1
Baseline	34	islam	No formal education	7	Business	2.65929	Richest	0	0	0	0	0	0	Drug Seller	0	0	1	TTBA	0	0	1		0	0	1
Baseline	25	islam	Secondary & higher(9+ Class)	3	Farming/Fishing/SL	2.81012	Richest	1	0	0	0	0	0		0	0	0	TTBA	0	0	0		0	0	0
Baseline	38	islam	Primary(1-5 Class)	9	Farming/Fishing/SL	1.30481	Poorer	1	0	0	0	0	0	Other	0	0	0	Doctor	1	1	1		0	0	0
Baseline	18	islam	Junior secondary(6-8 class)	1	Farming/Fishing/SL	2.23084	Richer	1	0	0	0	0	0	Nurse	1	0	1	Nurse	1	1	1	Nurse	1	1	1
Baseline	30	islam	No formal education	6	Farming/Fishing/SL	2.42582	Richer	1	0	0	0	0	0		0	0	1	TTBA	0	0	0		0	0	0
Baseline	26	islam	Junior secondary(6-8 class)	4	Service/Overseas worker	2.63931	Richest	0	0	0	0	0	0	CHCP	1	0	1	TTBA	0	0	0	CHCP	1	0	1
Baseline	20	islam	Primary(1-5 Class)	2	Farming/Fishing/SL	0.58503	Poorest	0	0	0	0	0	0	Doctor	1	1	1	TBA	0	0	0		0	0	0
Baseline	31	islam	No formal education	5	DL/R/VP/TW	1.0491	Poorer	1	0	0	0	0	0		0	0	0	TBA	0	0	0		0	0	1
Baseline	27	islam	No formal education	6	Farming/Fishing/SL	2.2843	Richer	0	1	0	0	0	0		0	0	1	TBA	0	0	0		0	0	0
Baseline	25	hindu	Primary(1-5 Class)	4	DL/R/VP/TW	2.01735	Middle	1	0	0	0	0	0	Other	0	0	0	TTBA	0	0	0	Drug Seller	0	0	1
Baseline	19	islam	Primary(1-5 Class)	1	Farming/Fishing/SL	2.01735	Middle	1	0	0	0	0	0		0	0	0	TBA	0	0	1	Doctor	1	0	1
Baseline	25	hindu	Primary(1-5 Class)	5	Farming/Fishing/SL	0.71023	Poorest	1	1	0	0	0	1		0	0	0	TBA	0	0	0	Drug Seller	0	0	1
Baseline	25	hindu	Primary(1-5 Class)	2	Farming/Fishing/SL	0.755835	Poorest	0	0	0	0	0	0	Doctor	1	1	1	TBA	0	0	1		0	0	1
Baseline	22	islam	No formal education	3	DL/R/VP/TW	0.757716	Poorest	0	0	0	0	0	0	Doctor	1	0	1	TBA	0	0	0		0	0	0
Baseline	20	islam	Primary(1-5 Class)	1	Farming/Fishing/SL	1.47467	Poorer	0	0	0	0	0	0	Doctor	1	0	1	Doctor	1	1	0	Doctor	1	1	1
Baseline	24	islam	No formal education	2	DL/R/VP/TW	0.186513	Poorest	0	0	0	0	0	0	Drug Seller	0	0	0	TTBA	0	0	0	TBA/TTBA	0	0	1
Baseline	20	islam	Primary(1-5 Class)	2	DL/R/VP/TW	2.60237	Richest	0	0	0	0	0	0	Doctor	1	0	1	TBA	0	0	1	Doctor	1	0	0
Baseline	37	islam	Primary(1-5 Class)	9	Farming/Fishing/SL	2.3983	Richer	0	0	0	0	0	0	Doctor	1	0	1	Nurse	1	1	1		0	0	0
Baseline	23	islam	Primary(1-5 Class)	2	Farming/Fishing/SL	2.3983	Richer	1	0	0	0	0	0		0	0	1	TTBA	0	0	1		0	0	0
Baseline	21	islam	Primary(1-5 Class)	10	DL/R/VP/TW	3.02744	Richest	1	0	0	0	0	0	Doctor	1	1	1	Doctor	1	1	0	Doctor	1	1	0
Baseline	22	islam	Secondary & higher(9+ Class)	2	Farming/Fishing/SL	1.80253	Middle	1	0	0	0	0	0		0	0	0	TBA	0	0	1		0	0	0
Baseline	21	islam	Primary(1-5 Class)	3	DL/R/VP/TW	1.134	Poorer	0	0	0	0	0	0		0	0	1	TTBA	0	0	0	Drug Seller	0	0	1
Baseline	22	hindu	Primary(1-5 Class)	2	DL/R/VP/TW	0.7085	Poorest	0	0	0	0	0	0	Doctor	1	1	1	TTBA	0	0	0		0	0	0
Baseline	22	hindu	Primary(1-5 Class)	2	DL/R/VP/TW	1.74561	Middle	1	0	0	0	0	0		0	0	0	TBA	0	0	0		0	0	0
Baseline	25	islam	No formal education	8	DL/R/VP/TW	0.70177	Poorest	0	1	0	0	0	0	Drug Seller	0	0	1	TBA	0	0	0	Drug Seller	0	0	1
Baseline	26	islam	No formal education	4	DL/R/VP/TW	2.12656	Richer	0	0	0	0	0	0		0	0	1	TBA	0	0	0		0	0	1
Baseline	26	islam	No formal education	5	Business	3.17904	Richest	1	0	0	0	0	0	Doctor	1	0	1	Doctor	1	1	1	Doctor	1	1	0
Baseline	22	islam	Primary(1-5 Class)	2	Others	0.764471	Poorest	1	0	0	0	0	0	Nurse	1	1	0	TBA	0	0	0		0	0	0
Baseline	21	islam	Primary(1-5 Class)	1	Service/Overseas worker	2.36931	Richer	1	0	0	0	0	0		0	0	0	Nurse	1	1	1		0	0	0
Baseline	20	islam	No formal education	2	DL/R/VP/TW	0.678315	Poorest	0	0	0	0	0	0	Other	0	0	1	Others	0	0	0		0	0	0
Baseline	30	islam	Secondary & higher(9+ Class)	3	Service/Overseas worker	2.44098	Richer	1	0	1	0	0	1		0	0	0	TBA	0	0	0		0	0	0
Baseline	28	islam	Primary(1-5 Class)	3	DL/R/VP/TW	1.57481	Poorer	0	0	0	0	0	0		0	0	0	TTBA	0	0	0		0	0	0
Baseline	20	islam	No formal education	2	DL/R/VP/TW	0.90256	Poorest	0	1	0	1	0	1	Doctor	1	0	1	TTBA	0	0	1	Drug Seller	0	0	1
Baseline	22	islam	Junior secondary(6-8 class)	1	Farming/Fishing/SL	2.3983	Richer	1	1	0	0	0	1	Other	0	0	0	TBA	0	0	1		0	0	0
Baseline	25	islam	Secondary & higher(9+ Class)	2	Service/Overseas worker	2.53457	Richer	0	0	0	0	0	0	Doctor	1	0	1	TBA	0	0	1	Doctor	1	1	1
Baseline	22	islam	No formal education	1	DL/R/VP/TW	0.84912	Poorest	0	0	0	0	0	0		0	0	0	TBA	0	0	0		0	0	0
Baseline	20	islam	Primary(1-5 Class)	1	Farming/Fishing/SL	2.01735	Middle	0	0	0	0	0	0		0	0	0	TBA	0	0	0		0	0	0
Baseline	21	islam	No formal education	2	Farming/Fishing/SL	2.28775	Richer	1	0	0	0	0	0		0	0	1	TTBA	0	0	0		0	0	0
Baseline	20	islam	Primary(1-5 Class)	2	DL/R/VP/TW	1.51106	Poorer	1	1	0	0	0	1	Drug Seller	0	0	1	TBA	0	0	0		0	0	0
Baseline	23	hindu	Primary(1-5 Class)	1	Farming/Fishing/SL	2.23084	Richer	1	0	0	0	0	0	Other	0	0	1	TBA	0	0	0	Drug Seller	0	0	1
Baseline	25	islam	No formal education	3	Others	2.61179	Richest	0	0	0	0	0	0	Doctor	1	0	1	TBA	0	0	1		0	0	1
Baseline	25	islam	Secondary & higher(9+ Class)	3	Business	2.95341	Richest	0	1	0	0	0	0	Drug Seller	0	0	1	TBA	0	0	1		0	0	0
Baseline	35	hindu	Secondary & higher(9+ Class)	6	Farming/Fishing/SL	2.77663	Richest	0	0	0	1	0	0	Doctor	1	0	1	TBA	0	0	0	Doctor	1	0	1
Baseline	30	islam	Primary(1-5 Class)	3	DL/R/VP/TW	0.315179	Poorest	0	0	0	0	0	0		0	0	1	TBA	0	0	0		0	0	0
Baseline	30	islam	No formal education	7	DL/R/VP/TW	1.37314	Poorer	0	0	0	0	0	0	Drug Seller	0	0	1	TTBA	0	0	1	Drug Seller	0	0	1
Baseline	20	islam	Primary(1-5 Class)	1	DL/R/VP/TW	1.95911	Middle	0	0	0	0	0	0	Doctor	1	0	0	Others	0	0	1		0	0	0
Baseline	29	islam	Primary(1-5 Class)	5	DL/R/VP/TW	0.84912	Poorest	0	0	0	0	0	0	Nurse	1	0	1	TTBA	0	0	0	Drug Seller	0	0	1
Baseline	20	islam	No formal education	1	DL/R/VP/TW	1.40573	Poorer	1	0	0	0	0	0		0	0	0	TTBA	0	0	0		0	0	0
Baseline	19	islam	Primary(1-5 Class)	1	DL/R/VP/TW	2.29741	Richer	0	0	0	0	0	0	Other	0	0	1	TTBA	0	0	1	Doctor	1	0	1
Baseline	21	islam	Primary(1-5 Class)	2	DL/R/VP/TW	2.14094	Richer	0	0	0	0	0	0	Doctor	1	0	1	Doctor	1	1	1	Doctor	1	1	1
Baseline	40	islam	No formal education	4	DL/R/VP/TW	2.45521	Richer	0	0	0	0	0	0		0	0	1	TBA	0	0	0	Nurse	1	0	1
Baseline	21	hindu	Primary(1-5 Class)	1	Others	2.28775	Richer	0	0	0	0	0	0		0	0	1	TBA	0	0	1		0	0	0
Baseline	30	islam	No formal education	6	Farming/Fishing/SL	0.58691	Poorest	1	0	0	0	0	0		0	0	1	TBA	0	0	0		0	0	1
Baseline	21	islam	Junior secondary(6-8 class)	2	Business	2.59663	Richest	1	0	0	0	0	0		0	0	1	Nurse	1	1	1	Drug Seller	0	0	1
Baseline	38	islam	Primary(1-5 Class)	8	Farming/Fishing/SL	0.926791	Poorer	0	0	0	0	0	0		0	0	0	Others	0	0	0		0	0	0
Baseline	24	islam	No formal education	1	DL/R/VP/TW	0.962515	Poorer	0	0	0	0	0	0	CHCP	1	0	1	Others	0	0	0		0	0	0
Baseline	28	islam	Primary(1-5 Class)	4	DL/R/VP/TW	1.29757	Poorer	0	0	0	0	0	0	Doctor	1	1	1	Nurse	1	1	1	Doctor	1	1	1
Baseline	24	islam	Primary(1-5 Class)	2	Business	0.765521	Poorest	1	0	1	0	0	1		0	0	1	TTBA	0	0	1		0	0	0
Baseline	30	islam	No formal education	2	Farming/Fishing/SL	1.57108	Poorer	0	0	0	0	0	0	Doctor	1	0	1	TBA	0	0	0		0	0	1
Baseline	22	islam	No formal education	2	Business	2.70283	Richest	1	0	0	0	0	0	Other	0	0	0	TBA	0	0	0	Drug Seller	0	0	1
Baseline	24	islam	Primary(1-5 Class)	3	Others	2.72118	Richest	1	1	0	0	0	1	Drug Seller	0	0	1	TBA	0	0	0	Drug Seller	0	0	1
Baseline	26	islam	No formal education	4	DL/R/VP/TW	0.705142	Poorest	0	0	0	0	0	0	Doctor	1	0	1	Others	0	0	0		0	0	0
Baseline	24	islam	Primary(1-5 Class)	4	Farming/Fishing/SL	0.213316	Poorest	0	0	0	1	0	0	Other	1	0	0	TTBA	0	0	0		0	0	1
Baseline	37	islam	No formal education	6	Others	0.221894	Poorest	1	0	0	0	0	0		0	0	1	TBA	0	0	1	Other	0	0	1
Baseline	26	hindu	Primary(1-5 Class)	2	Farming/Fishing/SL	1.75326	Middle	0	0	0	0	0	0	Doctor	1	1	1	Nurse	1	1	1	Doctor	1	1	1
Baseline	18	islam	Primary(1-5 Class)	1	Business	2.7077	Richest	1	0	1	0	0	1	Doctor	1	0	1	Nurse	0	1	1		0	0	0
Baseline	20	islam	Junior secondary(6-8 class)	1	Others	1.95593	Middle	1	0	0	0	0	0	Nurse	1	0	1	TBA	0	0	1	Doctor	1	0	1
Baseline	27	islam	Primary(1-5 Class)	5	Others	0.824294	Poorest	1	0	0	0	0	0	Other	1	1	1	TBA	0	0	1	Drug Seller	0	0	1
Baseline	23	islam	No formal education	3	DL/R/VP/TW	0.757716	Poorest	1	1	0	0	0	1	Nurse	1	1	1	TBA	0	0	1	Nurse	1	0	1
Baseline	20	hindu	Junior secondary(6-8 class)	1	DL/R/VP/TW	0.0932281	Poorest	1	0	0	0	0	0	Doctor	1	0	0	TBA	0	0	0	Drug Seller	0	0	1
Baseline	30	islam	Secondary & higher(9+ Class)	5	Farming/Fishing/SL	1.30477	Poorer	0	0	0	0	0	0	Doctor	1	0	0	TTBA	0	0	0	Doctor	1	0	1
Baseline	35	islam	No formal education	7	Farming/Fishing/SL	0.542897	Poorest	0	1	0	0	0	0	Nurse	1	0	0	TTBA	0	0	1		0	0	1
Baseline	25	hindu	Primary(1-5 Class)	2	Farming/Fishing/SL	1.75326	Middle	1	1	0	0	0	1	Doctor	1	0	1	TBA	0	0	0		0	0	0
Baseline	36	islam	No formal education	6	Others	2.06675	Middle	1	0	1	0	0	1		0	0	0	TTBA	0	0	0	Doctor	1	1	1
Baseline	22	islam	No formal education	2	Farming/Fishing/SL	2.26963	Richer	0	0	0	0	0	0	Nurse	1	0	0	TBA	0	0	0		0	0	0
Baseline	23	hindu	Primary(1-5 Class)	2	Others	1.84654	Middle	1	1	0	0	0	1	Nurse	1	0	1	TBA	0	0	0		0	0	1
Baseline	35	islam	No formal education	6	DL/R/VP/TW	1.23305	Poorer	0	0	0	0	0	0	Doctor	1	0	1	TBA	0	0	1	Doctor	1	0	0
Baseline	30	islam	No formal education	2	Farming/Fishing/SL	1.30481	Poorer	0	0	0	0	0	0		0	0	0	TBA	0	0	0		0	0	0
Baseline	22	islam	Primary(1-5 Class)	2	Farming/Fishing/SL	1.84694	Middle	0	1	1	0	0	1	Nurse	1	0	1	TBA	0	0	0		0	0	0
Baseline	27	hindu	Secondary & higher(9+ Class)	2	DL/R/VP/TW	1.10524	Poorer	0	1	0	0	0	0	CHCP	1	1	0	Nurse	1	1	1	Nurse	1	1	0
Baseline	23	hindu	Junior secondary(6-8 class)	1	DL/R/VP/TW	0.58503	Poorest	0	1	0	0	0	0	Nurse	1	1	1	Others	0	0	0	Other	0	0	1
Baseline	31	islam	No formal education	5	Farming/Fishing/SL	0.357319	Poorest	1	0	0	0	0	0		0	0	1	TBA	0	0	0	Drug Seller	0	0	1
Baseline	18	hindu	Secondary & higher(9+ Class)	1	Business	1.07337	Poorer	1	0	0	0	0	0	Doctor	1	0	1	TBA	0	0	1		0	0	1
Baseline	25	islam	Secondary & higher(9+ Class)	2	DL/R/VP/TW	0.221894	Poorest	0	0	0	0	0	0	Doctor	1	1	1	TBA	0	0	0		0	0	1
Baseline	16	islam	No formal education	1	Farming/Fishing/SL	0.630829	Poorest	0	0	0	0	0	0		0	0	1	TBA	0	0	1	Drug Seller	0	0	1
Baseline	27	hindu	Junior secondary(6-8 class)	3	Farming/Fishing/SL	1.30481	Poorer	1	1	0	0	0	1	Doctor	1	0	1	Doctor	1	1	0	Doctor	1	1	0
Baseline	23	islam	Primary(1-5 Class)	4	DL/R/VP/TW	1.55569	Poorer	0	0	0	0	0	0	Doctor	1	0	1	Nurse	0	1	0	Doctor	1	0	1
Baseline	35	islam	No formal education	10	Farming/Fishing/SL	1.01431	Poorer	1	0	0	0	0	0		0	0	1	TBA	0	0	1		0	0	1
Baseline	20	islam	Junior secondary(6-8 class)	1	Service/Overseas worker	2.76147	Richest	1	1	0	0	0	1	Doctor	1	1	1	TBA	0	0	0	Doctor	1	0	1
Baseline	22	hindu	Junior secondary(6-8 class)	2	DL/R/VP/TW	1.12085	Poorer	1	0	0	0	0	0	Doctor	1	0	1	TBA	0	0	0		0	0	1
Baseline	32	islam	No formal education	5	DL/R/VP/TW	1.15104	Poorer	1	0	0	0	0	0	Drug Seller	0	0	1	TBA	0	0	0		0	0	1
Baseline	20	islam	No formal education	1	DL/R/VP/TW	1.31245	Poorer	0	1	1	0	0	1		0	0	0	Doctor	1	1	1		0	0	0
Baseline	25	islam	No formal education	4	Others	1.12085	Poorer	1	0	0	0	0	0	Nurse	1	0	0	TBA	0	0	1		0	0	1
Baseline	37	islam	No formal education	4	Farming/Fishing/SL	1.76574	Middle	1	0	0	0	0	0		0	0	0	TTBA	0	0	1		0	0	0
Baseline	25	islam	No formal education	5	DL/R/VP/TW	0.315179	Poorest	0	0	0	0	0	0	Other	0	0	0	TTBA	0	0	0		0	0	1
Baseline	23	islam	Junior secondary(6-8 class)	3	Service/Overseas worker	2.76147	Richest	1	0	1	0	0	1	Doctor	1	1	0	Doctor	1	1	1		0	0	0
Baseline	33	islam	Secondary & higher(9+ Class)	3	Service/Overseas worker	2.56314	Richer	1	0	0	0	0	0	Doctor	1	1	1	TBA	0	0	0		0	0	0
Baseline	21	islam	Primary(1-5 Class)	2	Farming/Fishing/SL	1.40573	Poorer	0	0	0	0	0	0		0	0	1	TBA	0	0	1		0	0	0
Baseline	40	islam	No formal education	6	Farming/Fishing/SL	0.55754	Poorest	0	1	0	0	0	0	Doctor	1	0	1	TTBA	0	0	1		0	0	0
Baseline	25	islam	Primary(1-5 Class)	2	DL/R/VP/TW	0.3927	Poorest	0	0	1	0	0	0		0	0	0	TBA	0	0	1		0	0	1
Baseline	37	islam	No formal education	9	Business	1.60578	Middle	0	0	0	0	0	0		0	0	0	Others	0	0	1		0	0	0
Baseline	28	islam	Primary(1-5 Class)	3	Farming/Fishing/SL	1.57654	Middle	0	0	0	0	0	0	Doctor	1	0	0	Others	0	0	0		0	0	0
Baseline	23	islam	No formal education	2	Farming/Fishing/SL	1.94261	Middle	1	0	0	0	0	0	Doctor	1	1	1	TBA	0	0	0		0	0	1
Baseline	20	islam	No formal education	2	DL/R/VP/TW	0.877922	Poorest	0	0	0	0	0	0		0	0	0	Others	0	0	0		0	0	0
Baseline	32	islam	No formal education	8	DL/R/VP/TW	0.267694	Poorest	0	0	0	0	0	0		0	0	0	TTBA	0	0	0	Drug Seller	0	0	1
Baseline	22	islam	Primary(1-5 Class)	1	Farming/Fishing/SL	2.50756	Richer	1	0	0	0	0	0	Doctor	1	0	0	TTBA	0	0	0	Doctor	1	0	1
Baseline	26	hindu	Primary(1-5 Class)	2	Farming/Fishing/SL	1.92406	Middle	1	1	0	0	0	1	Doctor	1	0	1	Doctor	1	1	0	Drug Seller	0	0	1
Baseline	35	islam	No formal education	5	Farming/Fishing/SL	0.73827	Poorest	1	0	0	0	0	0	Doctor	1	0	1	Doctor	1	1	1	Doctor	1	0	1
Baseline	28	hindu	Secondary & higher(9+ Class)	1	Service/Overseas worker	3.20865	Richest	1	1	1	0	1	1	Doctor	1	1	0	Doctor	1	1	1	Doctor	1	1	0
Baseline	40	islam	Secondary & higher(9+ Class)	5	Service/Overseas worker	2.85941	Richest	0	0	0	0	0	0	Doctor	1	0	1	Doctor	1	1	1	Doctor	1	0	1
Baseline	27	islam	Secondary & higher(9+ Class)	2	Service/Overseas worker	2.9331	Richest	0	1	1	0	0	1	Doctor	1	1	0	Doctor	1	1	0	Doctor	1	1	0
Baseline	23	islam	Primary(1-5 Class)	1	Service/Overseas worker	2.56314	Richer	0	0	0	0	0	0	Doctor	1	0	1	Doctor	1	1	1	Doctor	1	1	0
Baseline	30	hindu	Primary(1-5 Class)	4	DL/R/VP/TW	1.57654	Middle	0	1	0	0	0	0	Doctor	1	1	1	Doctor	1	1	1	Drug Seller	0	0	0
Baseline	22	hindu	Junior secondary(6-8 class)	1	Business	3.31658	Richest	1	0	1	0	0	1	Doctor	1	1	1	Doctor	1	1	0		0	0	0
Baseline	26	hindu	Junior secondary(6-8 class)	1	Service/Overseas worker	1.73965	Middle	1	1	0	0	0	1	Doctor	1	1	0	Doctor	1	1	1		0	0	0
Baseline	26	hindu	Junior secondary(6-8 class)	1	Farming/Fishing/SL	1.85563	Middle	0	0	0	0	0	0	Doctor	1	1	1	Doctor	1	1	1	Doctor	1	0	0
Baseline	26	hindu	Primary(1-5 Class)	2	Others	2.13755	Richer	1	1	0	0	0	1	Doctor	1	0	0	Doctor	1	1	1		0	0	0
Baseline	25	islam	Primary(1-5 Class)	1	DL/R/VP/TW	1.12085	Poorer	1	0	1	0	0	1	Nurse	1	0	1	Doctor	1	1	1	Doctor	1	1	1
Baseline	24	islam	Primary(1-5 Class)	3	Farming/Fishing/SL	2.6687	Richest	1	0	0	0	0	0	Doctor	1	1	0	Doctor	1	1	0		0	0	0
Baseline	34	islam	Primary(1-5 Class)	5	Farming/Fishing/SL	2.86653	Richest	1	0	0	0	0	0	Doctor	1	0	0	Doctor	1	1	0	Nurse	1	1	0
Baseline	22	islam	Junior secondary(6-8 class)	1	Service/Overseas worker	2.01735	Middle	0	0	0	0	0	0	Doctor	1	0	1	Doctor	1	1	1	Doctor	1	0	0
Baseline	25	islam	Junior secondary(6-8 class)	2	Farming/Fishing/SL	2.61179	Richest	1	0	1	0	0	1	Nurse	1	0	1	Doctor	1	1	1	Doctor	1	1	1
Baseline	28	islam	Junior secondary(6-8 class)	3	DL/R/VP/TW	1.46837	Poorer	1	0	1	0	0	1	Doctor	1	0	1	Doctor	1	1	1	Doctor	1	0	0
Baseline	28	hindu	Junior secondary(6-8 class)	2	Farming/Fishing/SL	1.40852	Poorer	0	1	0	0	0	0	Doctor	1	1	1	Doctor	1	1	0	Doctor	1	1	1
Baseline	25	islam	Secondary & higher(9+ Class)	2	Service/Overseas worker	2.46985	Richer	1	1	0	0	0	1	Doctor	1	1	1	Doctor	1	1	1		0	0	0
Baseline	31	islam	No formal education	7	Business	2.6687	Richest	0	1	0	0	0	0	Drug Seller	0	0	1	Doctor	1	1	1		0	0	1
Baseline	18	islam	Secondary & higher(9+ Class)	1	Business	1.84654	Middle	1	1	0	0	0	1	Other	0	0	1	Doctor	1	1	1	Doctor	1	1	0
Baseline	22	hindu	Secondary & higher(9+ Class)	2	Farming/Fishing/SL	2.23084	Richer	0	1	1	0	0	1	Other	0	0	1	Doctor	1	1	0	Doctor	1	0	1
Baseline	22	islam	Primary(1-5 Class)	1	Service/Overseas worker	2.98071	Richest	1	1	0	0	0	1	Doctor	1	0	1	Doctor	1	1	1	Doctor	1	1	1
Midline	32	islam	Secondary & higher(9+ Class)	3	Farming/Fishing/SL	2.22749	Richer	1	0	0	0	0	0	Doctor	1	0	1	Doctor	1	1	1		0	0	0
Midline	20	islam	Primary(1-5 Class)	2	Service/Overseas worker	2.14094	Richer	1	0	0	0	0	0	PCSBA	1	0	1	Doctor	1	1	0	Nurse	1	1	0
Midline	30	islam	Primary(1-5 Class)	2	Farming/Fishing/SL	2.60237	Richest	0	0	0	0	0	0	Doctor	1	1	1	Doctor	1	1	0	Doctor	1	1	0
Midline	23	islam	Primary(1-5 Class)	3	DL/R/VP/TW	1.32003	Poorer	0	0	0	0	0	0	CHCP	1	0	0	TTBA	0	0	0		0	0	0
Midline	28	islam	No formal education	4	Farming/Fishing/SL	1.79905	Middle	0	0	0	0	0	0		0	0	0	TBA	0	0	0		0	0	0
Midline	22	islam	Primary(1-5 Class)	2	Farming/Fishing/SL	2.56314	Richer	1	0	0	0	0	0	PCSBA	1	0	0	TBA	0	0	0		0	0	1
Midline	26	islam	Primary(1-5 Class)	3	Farming/Fishing/SL	1.57947	Middle	1	1	0	0	0	1	PCSBA	1	0	0	PCSBA	0	1	0	PCSBA	1	1	0
Midline	24	hindu	Junior secondary(6-8 class)	2	Farming/Fishing/SL	2.51565	Richer	1	1	1	0	1	1	Doctor	1	1	1	TBA	0	0	1		0	0	1
Midline	30	islam	Primary(1-5 Class)	1	Service/Overseas worker	2.19112	Richer	1	0	0	0	0	0	Nurse	1	0	1	Nurse	1	1	1	Nurse	1	1	0
Midline	25	islam	Secondary & higher(9+ Class)	1	Service/Overseas worker	3.23731	Richest	1	0	1	0	0	1	Doctor	1	1	0	PCSBA	0	1	1	Doctor	1	1	0
Midline	18	islam	Junior secondary(6-8 class)	1	DL/R/VP/TW	1.21022	Poorer	1	0	0	0	0	0	Doctor	1	0	0	Nurse	1	1	0		0	0	0
Midline	24	islam	No formal education	1	DL/R/VP/TW	1.94261	Middle	1	0	0	0	0	0		0	0	1	Nurse	1	1	0	Doctor	1	1	1
Midline	20	islam	Primary(1-5 Class)	1	DL/R/VP/TW	1.13867	Poorer	1	0	0	0	0	0		0	0	1	Nurse	1	1	1	Doctor	1	1	0
Midline	18	islam	Secondary & higher(9+ Class)	2	Farming/Fishing/SL	1.97658	Middle	1	0	1	0	0	1	PCSBA	1	1	0	PCSBA	0	1	0	PCSBA	1	1	1
Midline	21	islam	Junior secondary(6-8 class)	2	Service/Overseas worker	2.12656	Richer	0	1	0	1	0	1	Nurse	1	0	0	Others	0	0	0		0	0	0
Midline	20	islam	Primary(1-5 Class)	1	DL/R/VP/TW	2.45521	Richer	0	0	0	0	0	0	CHCP	0	0	0	Nurse	1	1	1	Nurse	1	1	0
Midline	23	hindu	Primary(1-5 Class)	3	Business	2.3983	Richer	1	0	0	0	0	0	Doctor	1	0	1	TBA	0	0	0		0	0	0
Midline	22	islam	No formal education	1	Farming/Fishing/SL	2.60237	Richest	0	0	0	0	0	0	Doctor	1	0	1	TBA	0	0	0		0	0	0
Midline	21	hindu	Primary(1-5 Class)	1	DL/R/VP/TW	1.92406	Middle	1	1	1	0	1	1	Doctor	1	0	1	TBA	0	0	0		0	0	0
Midline	18	hindu	Primary(1-5 Class)	1	Service/Overseas worker	2.02407	Middle	0	0	0	0	0	0	Doctor	1	0	1	Nurse	1	1	0		0	0	0
Midline	30	islam	No formal education	6	DL/R/VP/TW	0.458244	Poorest	0	0	0	0	0	0		0	0	1	TBA	0	0	0		0	0	0
Midline	27	hindu	Junior secondary(6-8 class)	2	Farming/Fishing/SL	2.45521	Richer	1	0	0	1	0	1		0	0	0	TBA	0	0	0		0	0	0
Midline	25	islam	Primary(1-5 Class)	1	Farming/Fishing/SL	3.00123	Richest	1	0	0	0	0	0	Doctor	1	0	0	TTBA	0	0	0	Drug Seller	0	0	1
Midline	30	islam	Junior secondary(6-8 class)	2	DL/R/VP/TW	2.65929	Richest	1	1	0	0	0	1	PCSBA	1	0	1	Others	1	0	0	Other	1	1	1
Midline	28	islam	No formal education	3	Farming/Fishing/SL	0.976571	Poorer	1	1	0	1	1	1	Other	0	0	1	TBA	0	0	0	Drug Seller	0	0	0
Midline	23	islam	Primary(1-5 Class)	1	Business	2.56314	Richer	1	1	0	0	0	1	Doctor	1	0	0	TTBA	0	0	0	Doctor	1	1	0
Midline	34	islam	No formal education	5	Farming/Fishing/SL	1.02315	Poorer	1	0	0	1	0	1	Other	0	0	0	Others	0	0	0	Drug Seller	0	0	1
Midline	29	islam	No formal education	2	Farming/Fishing/SL	2.63586	Richest	1	1	1	0	1	1	Nurse	1	0	0	TTBA	1	0	1		0	0	0
Midline	30	islam	No formal education	6	DL/R/VP/TW	0.767142	Poorest	0	1	0	0	0	0	Doctor	1	1	0	PCSBA	1	1	0	PCSBA	1	0	0
Midline	26	hindu	Primary(1-5 Class)	3	Farming/Fishing/SL	1.57654	Middle	0	0	0	0	0	0	CHCP	0	0	0	TBA	0	0	0		0	0	0
Midline	24	hindu	Junior secondary(6-8 class)	3	Farming/Fishing/SL	1.99952	Middle	1	0	0	0	0	0	Doctor	1	0	0	Nurse	1	1	0	Doctor	1	1	0
Midline	36	islam	Junior secondary(6-8 class)	3	Business	2.91998	Richest	1	1	1	1	1	1	Doctor	1	1	1	Nurse	1	1	0	Doctor	1	1	0
Midline	21	islam	Junior secondary(6-8 class)	2	DL/R/VP/TW	2.35098	Richer	0	0	0	0	0	0	Doctor	1	0	1	TTBA	0	0	0		0	0	0
Midline	23	islam	Primary(1-5 Class)	4	DL/R/VP/TW	2.39233	Richer	1	1	0	0	0	1	Doctor	1	0	1	TTBA	0	0	0		0	0	0
Midline	30	islam	No formal education	4	DL/R/VP/TW	1.08685	Poorer	0	0	0	0	0	0	PCSBA	1	0	0	TTBA	0	0	0		0	0	0
Midline	20	islam	Junior secondary(6-8 class)	1	DL/R/VP/TW	2.26963	Richer	1	0	0	0	0	0	Doctor	1	0	0	TBA	0	0	0		0	0	1
Midline	16	islam	Primary(1-5 Class)	1	DL/R/VP/TW	2.99516	Richest	1	1	0	0	0	1	Nurse	1	0	0	TTBA	0	0	0	Drug Seller	0	0	0
Midline	21	islam	Junior secondary(6-8 class)	2	DL/R/VP/TW	2.62972	Richest	1	1	0	1	1	1	Nurse	1	0	1	TTBA	0	0	0		0	0	0
Midline	20	islam	No formal education	1	Farming/Fishing/SL	2.38699	Richer	1	0	0	0	0	0		0	0	0	TBA	0	0	0		0	0	0
Midline	40	islam	Junior secondary(6-8 class)	5	Farming/Fishing/SL	2.10745	Middle	1	0	0	1	0	1	Doctor	1	0	1	Doctor	1	1	1	Doctor	1	1	0
Midline	20	islam	Junior secondary(6-8 class)	1	Farming/Fishing/SL	2.45521	Richer	1	0	0	0	0	0	Doctor	1	0	1	TBA	0	0	0		0	0	0
Midline	25	islam	Primary(1-5 Class)	3	DL/R/VP/TW	1.91	Middle	0	0	0	0	0	0		0	0	0	TBA	0	0	0		0	0	1
Midline	21	islam	Primary(1-5 Class)	2	DL/R/VP/TW	1.27239	Poorer	0	0	0	1	0	0		0	0	0	Others	0	0	0		0	0	0
Midline	22	islam	Primary(1-5 Class)	2	Farming/Fishing/SL	1.74561	Middle	1	1	0	0	0	1	Doctor	1	0	0	TBA	0	0	0		0	0	0
Midline	25	islam	Junior secondary(6-8 class)	1	Business	2.75514	Richest	1	1	0	0	0	1	Doctor	1	0	1	Doctor	1	1	1	Doctor	1	1	1
Midline	26	islam	Primary(1-5 Class)	3	Farming/Fishing/SL	2.47753	Richer	1	0	0	1	0	1		0	0	0	TTBA	0	0	0	Drug Seller	0	0	0
Midline	26	islam	No formal education	7	DL/R/VP/TW	0.690064	Poorest	1	0	0	0	0	0		0	0	0	Others	0	0	0		0	0	0
Midline	22	islam	Primary(1-5 Class)	1	DL/R/VP/TW	1.94261	Middle	1	1	0	0	0	1	Doctor	1	0	0	TBA	0	0	0		0	0	0
Midline	29	islam	No formal education	4	DL/R/VP/TW	1.50007	Poorer	1	0	0	0	0	0	Doctor	1	0	0	TBA	0	0	0	Drug Seller	0	0	0
Midline	27	islam	Primary(1-5 Class)	4	Business	1.35216	Poorer	1	0	0	0	0	0	PCSBA	1	0	0	TTBA	0	0	0		0	0	0
Midline	33	islam	No formal education	6	DL/R/VP/TW	2.51565	Richer	1	0	0	0	0	0	Drug Seller	0	0	0	TBA	0	0	0		0	0	0
Midline	25	islam	Primary(1-5 Class)	3	DL/R/VP/TW	2.2844	Richer	0	1	0	0	0	0		0	0	0	TTBA	0	0	0		0	0	0
Midline	27	islam	Secondary & higher(9+ Class)	2	Farming/Fishing/SL	3.18483	Richest	1	0	0	0	0	0	Doctor	1	0	1	TTBA	0	0	0		0	0	1
Midline	28	islam	Secondary & higher(9+ Class)	3	Service/Overseas worker	1.51123	Poorer	0	0	0	1	0	0	Doctor	1	0	0	TTBA	0	0	0	Drug Seller	0	0	0
Midline	19	islam	Primary(1-5 Class)	1	DL/R/VP/TW	2.79683	Richest	1	1	0	1	1	1	Nurse	1	0	0	TBA	0	0	0		0	0	0
Midline	19	islam	Secondary & higher(9+ Class)	1	Business	1.53352	Poorer	1	1	0	0	0	1	Doctor	1	0	0	TTBA	0	0	0		0	0	0
Midline	33	islam	Primary(1-5 Class)	4	DL/R/VP/TW	2.01657	Middle	1	0	1	0	0	1	Nurse	1	0	1	PCSBA	0	1	1		0	0	0
Midline	23	islam	Primary(1-5 Class)	2	Service/Overseas worker	1.94261	Middle	1	1	0	0	0	1	Other	0	0	0	TTBA	0	0	0	Other	0	0	1
Midline	26	islam	Primary(1-5 Class)	3	Business	2.2	Richer	1	1	0	0	0	1	Doctor	1	1	1	Others	1	0	1	Doctor	1	0	1
Midline	24	islam	No formal education	3	Business	1.63345	Middle	1	0	0	0	0	0	Doctor	1	0	0	PCSBA	0	1	0	Drug Seller	0	0	0
Midline	28	hindu	Junior secondary(6-8 class)	3	Service/Overseas worker	2.3983	Richer	1	0	0	0	0	0	Other	0	0	1	Doctor	1	1	1		0	0	1
Midline	21	islam	Primary(1-5 Class)	2	Farming/Fishing/SL	2.03516	Middle	0	0	0	1	0	0	PCSBA	1	1	0	Others	0	0	1		0	0	1
Midline	24	hindu	Primary(1-5 Class)	3	Farming/Fishing/SL	1.51106	Poorer	1	0	0	0	0	0	Doctor	1	0	1	Nurse	1	1	0	Doctor	1	1	1
Midline	22	islam	Primary(1-5 Class)	2	DL/R/VP/TW	2.29905	Richer	0	1	1	0	0	1	Other	0	0	0	Others	0	0	0		0	0	1
Midline	29	hindu	Secondary & higher(9+ Class)	2	Business	2.27834	Richer	1	0	1	0	0	1	Doctor	1	1	0	PCSBA	0	1	0	Doctor	1	0	0
Midline	36	hindu	No formal education	2	Farming/Fishing/SL	1.17776	Poorer	0	1	1	0	0	1	Doctor	1	0	0	Doctor	1	1	0	Doctor	1	1	0
Midline	19	islam	Primary(1-5 Class)	2	DL/R/VP/TW	2.3983	Richer	1	0	0	0	0	0	Doctor	1	0	0	Nurse	0	1	0		0	0	0
Midline	24	hindu	Secondary & higher(9+ Class)	1	Farming/Fishing/SL	2.30501	Richer	1	1	0	1	1	1	PCSBA	1	0	0	TTBA	0	0	1		0	0	0
Midline	24	islam	Primary(1-5 Class)	4	DL/R/VP/TW	0.824294	Poorest	1	1	0	0	0	1	Other	0	0	0	Others	0	0	0	Other	0	0	0
Midline	20	islam	Primary(1-5 Class)	2	Service/Overseas worker	2.82534	Richest	1	1	0	0	0	1	PCSBA	1	0	0	PCSBA	0	1	0		0	0	0
Midline	18	islam	No formal education	1	DL/R/VP/TW	0.848182	Poorest	1	0	0	0	0	0	Doctor	1	0	0	TBA	0	0	0	Drug Seller	0	0	0
Midline	26	islam	Secondary & higher(9+ Class)	2	Service/Overseas worker	2.80071	Richest	1	0	0	0	0	0	Doctor	1	0	1	TTBA	0	0	0	CHCP	1	1	1
Midline	26	islam	Primary(1-5 Class)	3	DL/R/VP/TW	1.19852	Poorer	1	0	0	0	0	0	Doctor	1	1	1	TTBA	0	0	0	Nurse	1	1	1
Midline	20	islam	Primary(1-5 Class)	2	DL/R/VP/TW	2.24566	Richer	0	0	0	0	0	0		0	0	0	Others	0	0	0		0	0	0
Midline	19	islam	Primary(1-5 Class)	1	Business	2.76722	Richest	1	0	1	0	0	1	Doctor	1	1	0	TTBA	0	0	0	Drug Seller	0	0	0
Midline	38	islam	No formal education	6	Farming/Fishing/SL	2.01735	Middle	0	0	0	0	0	0	Doctor	1	0	1	TBA	0	0	0		0	0	0
Midline	20	islam	Primary(1-5 Class)	1	DL/R/VP/TW	2.04142	Middle	1	0	0	0	0	0	Doctor	1	0	0	TBA	0	0	0	Drug Seller	0	0	0
Midline	34	hindu	Primary(1-5 Class)	3	Farming/Fishing/SL	1.40573	Poorer	1	0	0	0	0	0	CHCP	0	0	1	TTBA	0	0	0		0	0	0
Midline	30	islam	Junior secondary(6-8 class)	3	DL/R/VP/TW	0.757716	Poorest	1	0	0	0	0	0	Nurse	1	0	1	Nurse	1	1	1	Nurse	1	1	1
Midline	26	islam	No formal education	4	DL/R/VP/TW	1.55871	Poorer	1	0	0	0	0	0	Doctor	1	0	1	Others	0	0	0		0	0	0
Midline	30	islam	Primary(1-5 Class)	5	Farming/Fishing/SL	2.7679	Richest	1	0	0	0	0	0	CHCP	0	0	0	TTBA	0	0	0		0	0	0
Midline	26	islam	No formal education	1	Business	1.95749	Middle	1	0	0	0	0	0		0	0	0	TBA	0	0	0		0	0	0
Midline	22	islam	Secondary & higher(9+ Class)	1	Business	2.44487	Richer	1	0	0	1	0	1	Doctor	1	0	0	Doctor	1	1	1	Doctor	1	1	1
Midline	24	islam	Primary(1-5 Class)	3	Service/Overseas worker	2.46488	Richer	1	1	1	0	1	1	PCSBA	1	0	0	TBA	0	0	0	Drug Seller	0	0	0
Midline	32	islam	Primary(1-5 Class)	6	DL/R/VP/TW	1.65421	Middle	1	0	0	0	0	0	Other	0	0	1	Others	0	0	0	Drug Seller	0	0	0
Midline	36	islam	No formal education	10	DL/R/VP/TW	0.519979	Poorest	1	0	0	0	0	0	Nurse	1	0	0	TBA	0	0	0		0	0	0
Midline	21	islam	Primary(1-5 Class)	2	DL/R/VP/TW	0.81945	Poorest	1	1	0	0	0	1	Nurse	1	0	1	TTBA	0	0	0		0	0	1
Midline	20	hindu	Secondary & higher(9+ Class)	1	Service/Overseas worker	2.76147	Richest	1	0	0	0	0	0	Doctor	1	1	0	Doctor	1	1	0	Doctor	1	1	0
Midline	27	islam	Secondary & higher(9+ Class)	2	Business	2.65929	Richest	1	1	1	0	1	1	Doctor	1	0	1	Nurse	1	1	0	Doctor	1	1	0
Midline	18	islam	Junior secondary(6-8 class)	1	Farming/Fishing/SL	2.3983	Richer	1	0	0	1	0	1	Doctor	1	0	1	TTBA	0	0	1		0	0	0
Midline	21	islam	Primary(1-5 Class)	1	Farming/Fishing/SL	1.57947	Middle	0	0	0	0	0	0	Doctor	1	0	1	TBA	0	0	1		0	0	1
Midline	22	hindu	Secondary & higher(9+ Class)	1	Business	2.81012	Richest	1	1	0	0	0	1	Doctor	1	0	0	Doctor	1	1	0	Doctor	1	1	0
Midline	27	islam	Junior secondary(6-8 class)	2	Business	2.79683	Richest	1	1	1	0	1	1	Doctor	1	0	0	TTBA	0	0	0	Drug Seller	1	0	1
Midline	37	islam	No formal education	5	Farming/Fishing/SL	2.81293	Richest	0	1	1	0	0	1	Doctor	1	0	1	TTBA	0	0	0	Drug Seller	0	0	1
Midline	27	islam	Primary(1-5 Class)	3	DL/R/VP/TW	1.84654	Middle	1	0	0	0	0	0	Doctor	1	0	0	TBA	0	0	0	Drug Seller	0	0	0
Midline	24	islam	Junior secondary(6-8 class)	1	Farming/Fishing/SL	3.17073	Richest	1	0	0	0	0	0	Doctor	1	0	0	TTBA	0	0	0	Drug Seller	0	0	1
Midline	39	islam	Junior secondary(6-8 class)	3	Service/Overseas worker	3.15557	Richest	1	0	0	0	0	0	Doctor	1	0	0	Doctor	1	1	1	Doctor	1	1	0
Midline	33	islam	No formal education	3	DL/R/VP/TW	1.37314	Poorer	1	0	0	0	0	0	CHCP	0	0	0	TBA	0	0	0		0	0	0
Midline	25	islam	No formal education	3	Farming/Fishing/SL	2.133	Richer	0	0	0	0	0	0	Other	0	0	1	TBA	0	0	0		0	0	1
Midline	28	hindu	Primary(1-5 Class)	2	DL/R/VP/TW	1.02757	Poorer	1	0	0	0	0	0		0	0	0	TBA	0	0	0		0	0	0
Midline	21	islam	Junior secondary(6-8 class)	1	DL/R/VP/TW	3.41836	Richest	1	1	0	0	0	1	Doctor	1	0	1	Doctor	1	1	0	Doctor	1	1	0
Midline	24	islam	Primary(1-5 Class)	1	Business	2.0534	Middle	1	0	0	0	0	0	Drug Seller	0	0	0	TBA	0	0	0	Drug Seller	0	0	0
Midline	24	islam	Secondary & higher(9+ Class)	2	Farming/Fishing/SL	2.59663	Richest	1	1	0	0	0	1	Nurse	1	0	0	Doctor	1	1	0		0	0	1
Midline	25	islam	No formal education	1	Service/Overseas worker	1.95749	Middle	1	1	0	0	0	1	Doctor	1	0	1	Others	0	0	0	Doctor	1	0	1
Midline	20	islam	No formal education	2	Farming/Fishing/SL	1.10524	Poorer	1	1	0	0	0	1	PCSBA	1	0	1	TBA	0	0	0		0	0	0
Midline	21	islam	Primary(1-5 Class)	1	Farming/Fishing/SL	0.997896	Poorer	1	1	0	0	0	1	Doctor	1	0	0	TBA	0	0	0		0	0	1
Midline	28	islam	Primary(1-5 Class)	4	Farming/Fishing/SL	0.757716	Poorest	1	1	0	0	0	1	Doctor	1	0	1	TBA	0	0	0		0	0	0
Midline	25	islam	No formal education	2	Farming/Fishing/SL	1.02757	Poorer	1	1	0	0	0	1	Doctor	1	0	1	TBA	0	0	0		0	0	0
Midline	20	islam	Junior secondary(6-8 class)	1	Business	2.51736	Richer	0	0	0	0	0	0	Doctor	1	1	1	Doctor	1	1	1		0	0	1
Midline	25	islam	Junior secondary(6-8 class)	1	Farming/Fishing/SL	2.32641	Richer	0	0	0	0	0	0		0	0	0	Others	0	0	1		0	0	0
Midline	24	islam	Primary(1-5 Class)	5	DL/R/VP/TW	2.6687	Richest	1	0	0	0	0	0	CHCP	1	0	1	TTBA	0	0	0		0	0	0
Midline	25	islam	Primary(1-5 Class)	1	DL/R/VP/TW	0.983703	Poorer	0	0	1	1	0	1		0	0	1	TTBA	0	0	1		0	0	0
Midline	19	islam	Primary(1-5 Class)	1	Farming/Fishing/SL	1.331	Poorer	1	0	0	0	0	0	Doctor	1	1	0	TTBA	0	0	0		0	0	0
Midline	35	islam	No formal education	7	Farming/Fishing/SL	1.73554	Middle	1	0	0	0	0	0	Other	0	0	0	Others	0	0	0	Other	0	0	1
Midline	31	islam	No formal education	5	DL/R/VP/TW	0.757716	Poorest	1	0	0	1	0	1	PCSBA	1	0	0	TBA	0	0	0	Drug Seller	0	0	1
Midline	21	islam	Junior secondary(6-8 class)	2	Farming/Fishing/SL	2.22749	Richer	1	0	0	1	0	1	Doctor	1	1	1	TBA	0	0	0		0	0	1
Midline	26	islam	Primary(1-5 Class)	3	Farming/Fishing/SL	2.98071	Richest	1	0	0	0	0	0	Doctor	1	0	0	TTBA	0	0	0	Drug Seller	0	0	1
Midline	38	islam	No formal education	8	DL/R/VP/TW	1.15182	Poorer	1	0	0	0	0	0	CHCP	1	0	1	TBA	0	0	0		0	0	1
Midline	31	islam	Primary(1-5 Class)	2	Farming/Fishing/SL	2.62602	Richest	1	0	0	0	0	0	Doctor	1	0	0	Doctor	1	1	1	Doctor	1	1	0
Midline	21	islam	Primary(1-5 Class)	2	DL/R/VP/TW	1.331	Poorer	1	0	0	0	0	0	CHCP	1	0	0	TTBA	0	0	0	Drug Seller	0	0	0
Midline	26	islam	Primary(1-5 Class)	3	Service/Overseas worker	2.22749	Richer	1	0	0	0	0	0	Nurse	1	1	1	PCSBA	0	1	1		0	0	0
Midline	26	islam	Junior secondary(6-8 class)	1	Farming/Fishing/SL	2.3983	Richer	0	1	0	0	0	0	Doctor	1	0	1	TTBA	0	0	0	Doctor	1	0	1
Midline	25	islam	No formal education	3	Farming/Fishing/SL	1.5018	Poorer	1	1	0	0	0	1	Nurse	1	1	0	TBA	0	0	1		0	0	0
Midline	24	islam	Primary(1-5 Class)	3	Service/Overseas worker	2.81587	Richest	1	1	0	0	0	1		0	0	0	TTBA	0	0	0		0	0	0
Midline	29	islam	Primary(1-5 Class)	2	Others	2.85762	Richest	1	1	0	0	0	1	Doctor	1	0	1	TBA	0	0	1	Doctor	1	1	1
Midline	32	islam	No formal education	6	DL/R/VP/TW	2.03516	Middle	1	0	0	0	0	0	PCSBA	1	0	0	PCSBA	0	1	0	Other	0	0	1
Midline	23	islam	Secondary & higher(9+ Class)	2	Service/Overseas worker	2.95724	Richest	0	0	0	0	0	0	Doctor	1	0	0	Nurse	1	1	0	Nurse	1	1	0
Midline	32	islam	Primary(1-5 Class)	4	Business	1.13867	Poorer	0	0	0	0	0	0		0	0	0	TBA	0	0	0		0	0	0
Midline	20	hindu	No formal education	1	Farming/Fishing/SL	2.45521	Richer	1	1	0	0	0	1	Doctor	1	1	1	Doctor	1	1	0	Doctor	1	1	1
Midline	32	hindu	Primary(1-5 Class)	3	Farming/Fishing/SL	1.02757	Poorer	0	0	0	0	0	0		0	0	0	Others	1	0	1	Other	0	0	1
Midline	22	hindu	Primary(1-5 Class)	2	Farming/Fishing/SL	1.74561	Middle	1	0	0	0	0	0	Doctor	1	0	1	TBA	0	0	0		0	0	0
Midline	27	islam	No formal education	4	DL/R/VP/TW	2.47102	Richer	1	0	0	0	0	0	Doctor	1	1	1	Doctor	1	1	1	Nurse	1	1	1
Midline	25	hindu	Secondary & higher(9+ Class)	1	Service/Overseas worker	2.23084	Richer	1	0	0	0	0	0	Doctor	1	1	1	Doctor	1	1	0	Doctor	1	1	0
Midline	31	islam	No formal education	6	DL/R/VP/TW	1.13867	Poorer	1	0	0	1	0	1	PCSBA	1	0	0	Nurse	1	1	1	Doctor	1	1	0
Midline	26	islam	Primary(1-5 Class)	4	Farming/Fishing/SL	2.36113	Richer	1	1	0	1	1	1	Other	0	0	0	TTBA	0	0	0	Doctor	1	0	1
Midline	20	islam	Primary(1-5 Class)	1	DL/R/VP/TW	2.3983	Richer	1	0	0	0	0	0	Doctor	1	1	1	TBA	0	0	1		0	0	0
Midline	23	islam	Primary(1-5 Class)	2	DL/R/VP/TW	1.25732	Poorer	1	0	0	0	0	0	PCSBA	1	0	0	Others	1	0	0	Other	0	0	0
Midline	26	islam	Primary(1-5 Class)	2	Farming/Fishing/SL	2.18	Richer	1	0	0	0	0	0	Doctor	1	0	1	TBA	0	0	1		0	0	0
Midline	22	islam	Junior secondary(6-8 class)	2	Farming/Fishing/SL	3.07077	Richest	1	0	0	1	0	1	Doctor	1	0	1	TTBA	0	0	0		0	0	1
Midline	25	islam	Primary(1-5 Class)	3	DL/R/VP/TW	2.24566	Richer	1	0	0	0	0	0	Drug Seller	0	0	0	Others	0	0	0		0	0	0
Midline	29	islam	Primary(1-5 Class)	3	DL/R/VP/TW	0.58503	Poorest	0	0	0	0	0	0		0	0	0	TBA	0	0	1		0	0	1
Midline	32	islam	Primary(1-5 Class)	4	Farming/Fishing/SL	2.33064	Richer	1	0	0	0	0	0	Drug Seller	0	0	1	TBA	0	0	0		0	0	0
Midline	30	islam	No formal education	4	DL/R/VP/TW	2.38756	Richer	0	0	1	0	0	0	Doctor	1	0	1	Doctor	1	1	0	Doctor	1	1	1
Midline	24	islam	Primary(1-5 Class)	1	Service/Overseas worker	2.90476	Richest	1	0	0	0	0	0	Doctor	1	0	1	Doctor	1	1	1	Doctor	1	1	1
Midline	24	islam	Secondary & higher(9+ Class)	1	Business	2.90476	Richest	1	1	1	0	1	1	Doctor	1	0	0	Doctor	1	1	1	Doctor	1	1	1
Midline	37	islam	Primary(1-5 Class)	4	Farming/Fishing/SL	2.46488	Richer	1	1	0	0	0	1	Doctor	1	0	1	PCSBA	0	1	1	PCSBA	1	1	1
Midline	35	islam	No formal education	6	DL/R/VP/TW	1.331	Poorer	1	0	0	0	0	0	Doctor	1	1	1	Nurse	1	1	0	Nurse	1	1	0
Midline	30	islam	No formal education	5	Business	0.71023	Poorest	1	0	0	0	0	0	Nurse	1	0	0	Others	0	0	0		0	0	0
Midline	25	islam	Primary(1-5 Class)	3	Business	1.8642	Middle	1	0	0	0	0	0	Doctor	1	0	0	TBA	0	0	0	Doctor	1	1	1
Midline	32	hindu	No formal education	6	Farming/Fishing/SL	1.40852	Poorer	1	0	0	0	0	0	Doctor	1	0	0	TBA	0	0	0		0	0	0
Midline	34	islam	Junior secondary(6-8 class)	6	Business	2.36192	Richer	1	1	0	0	0	1	Doctor	1	1	1	Doctor	1	1	1	Doctor	1	1	1
Midline	25	islam	Primary(1-5 Class)	3	Farming/Fishing/SL	2.45521	Richer	1	1	0	0	0	1	Doctor	1	1	1	PCSBA	0	1	0	PCSBA	1	1	1
Midline	36	islam	Primary(1-5 Class)	7	Service/Overseas worker	2.31153	Richer	1	0	0	0	0	0	Doctor	1	0	0	Doctor	1	1	1	Doctor	1	1	0
Midline	19	islam	Primary(1-5 Class)	1	Service/Overseas worker	2.5643	Richer	1	1	0	0	0	1	Doctor	1	0	0	TBA	0	0	0	Drug Seller	0	0	0
Midline	30	islam	Primary(1-5 Class)	4	DL/R/VP/TW	1.45081	Poorer	1	0	0	0	0	0	Doctor	1	0	1	TTBA	0	0	1		0	0	1
Midline	19	islam	Primary(1-5 Class)	2	Farming/Fishing/SL	2.3983	Richer	1	0	0	0	0	0	CHCP	0	0	0	TBA	0	0	1		0	0	0
Midline	26	islam	Primary(1-5 Class)	3	Business	0.485985	Poorest	1	0	0	0	0	0	PCSBA	1	0	0	TBA	0	0	0		0	0	0
Midline	24	islam	Primary(1-5 Class)	3	DL/R/VP/TW	1.57947	Middle	1	1	0	0	0	1		0	0	0	TTBA	0	0	0		0	0	0
Midline	22	islam	Primary(1-5 Class)	1	Farming/Fishing/SL	1.70296	Middle	1	1	0	1	1	1	Doctor	1	1	1	Others	0	0	0		0	0	0
Midline	22	islam	Primary(1-5 Class)	2	Farming/Fishing/SL	3.01032	Richest	0	0	0	0	0	0	Doctor	1	1	0	PCSBA	0	1	0		0	0	0
Midline	20	islam	Primary(1-5 Class)	1	DL/R/VP/TW	2.61179	Richest	0	0	0	0	0	0		0	0	0	TBA	0	0	0		0	0	1
Midline	20	islam	Secondary & higher(9+ Class)	1	Farming/Fishing/SL	2.3983	Richer	0	0	0	0	0	0	Doctor	1	0	1	Doctor	1	1	1	Doctor	1	1	0
Midline	26	islam	Junior secondary(6-8 class)	2	Service/Overseas worker	3.10309	Richest	1	0	0	0	0	0	Doctor	1	0	0	Doctor	1	1	1	Doctor	1	1	0
Midline	24	islam	Secondary & higher(9+ Class)	1	Farming/Fishing/SL	3.23851	Richest	1	1	0	0	0	1	Doctor	1	1	1	Doctor	1	1	1	Doctor	1	1	1
Midline	25	islam	Primary(1-5 Class)	3	Farming/Fishing/SL	3.03319	Richest	1	0	1	0	0	1		0	0	0	TBA	0	0	0		0	0	0
Midline	26	islam	No formal education	3	Farming/Fishing/SL	1.94261	Middle	1	0	0	0	0	0		0	0	0	TTBA	0	0	0		0	0	0
Midline	21	islam	Primary(1-5 Class)	2	DL/R/VP/TW	2.81012	Richest	0	0	0	0	0	0	Doctor	1	0	0	TBA	0	0	0		0	0	0
Midline	25	islam	Secondary & higher(9+ Class)	3	Service/Overseas worker	2.61179	Richest	1	1	1	0	1	1	Doctor	1	1	0	TBA	0	0	0	Doctor	1	0	1
Midline	25	islam	Primary(1-5 Class)	4	Business	1.87151	Middle	1	1	0	0	0	1	Doctor	1	0	1	TBA	0	0	0		0	0	0
Midline	22	islam	Primary(1-5 Class)	1	Others	2.61179	Richest	1	0	0	0	0	0		0	0	0	Nurse	1	1	0	Nurse	1	1	0
Midline	32	islam	No formal education	3	DL/R/VP/TW	1.57947	Middle	0	0	0	0	0	0		0	0	0	TBA	0	0	0	Doctor	1	0	0
Midline	22	islam	Primary(1-5 Class)	1	DL/R/VP/TW	2.76722	Richest	0	0	0	0	0	0	Nurse	1	0	0	Nurse	1	1	0	Nurse	1	1	0
Midline	21	islam	Primary(1-5 Class)	1	DL/R/VP/TW	2.98071	Richest	1	0	0	0	0	0		0	0	1	TBA	0	0	0	Drug Seller	0	0	0
Midline	20	islam	Primary(1-5 Class)	1	Service/Overseas worker	2.98071	Richest	1	1	0	0	0	1	Doctor	1	0	0	Nurse	1	1	0	Nurse	1	1	0
Midline	26	islam	Primary(1-5 Class)	5	Service/Overseas worker	2.3983	Richer	1	0	0	0	0	0		0	0	0	TBA	0	0	0	Drug Seller	0	0	1
Midline	30	islam	Primary(1-5 Class)	5	DL/R/VP/TW	2.22749	Richer	1	1	0	0	0	1	Doctor	1	0	1	Nurse	1	1	1	Nurse	1	1	0
Midline	20	islam	Primary(1-5 Class)	1	Farming/Fishing/SL	2.3983	Richer	1	1	0	0	0	1	PCSBA	1	0	0	PCSBA	0	1	1	TBA/TTBA	0	0	0
Midline	30	islam	Primary(1-5 Class)	3	DL/R/VP/TW	2.45521	Richer	1	1	0	0	0	1	Doctor	1	1	1	Doctor	1	1	0	Doctor	1	1	0
Midline	28	islam	Primary(1-5 Class)	3	DL/R/VP/TW	0.654411	Poorest	1	0	0	0	0	0	PCSBA	1	0	0	Doctor	1	1	1	Doctor	1	1	0
Midline	23	islam	Primary(1-5 Class)	2	Farming/Fishing/SL	2.3983	Richer	1	1	0	0	0	1	PCSBA	1	0	1	Nurse	1	1	0		0	0	0
Midline	27	islam	Primary(1-5 Class)	2	DL/R/VP/TW	2.02677	Middle	1	0	0	0	0	0	PCSBA	1	0	0	TTBA	0	0	0		0	0	0
Midline	27	islam	No formal education	2	Farming/Fishing/SL	3.06621	Richest	1	1	0	0	0	1	Doctor	1	0	0	Doctor	1	1	0	Doctor	1	1	0
Midline	23	islam	Junior secondary(6-8 class)	2	Farming/Fishing/SL	2.50334	Richer	1	0	0	0	0	0	Doctor	1	0	0	TBA	0	0	0		0	0	0
Midline	24	islam	Primary(1-5 Class)	2	Business	1.13867	Poorer	0	0	0	0	0	0	Doctor	1	0	0	TBA	0	0	0		0	0	0
Midline	29	islam	Primary(1-5 Class)	4	Business	2.52793	Richer	1	0	0	0	0	0	PCSBA	1	0	0	PCSBA	0	1	0		0	0	0
Midline	24	islam	No formal education	2	DL/R/VP/TW	0.602845	Poorest	0	0	0	0	0	0	CHCP	0	0	0	TBA	0	0	0		0	0	0
Midline	43	islam	Primary(1-5 Class)	6	Farming/Fishing/SL	2.90476	Richest	1	0	0	0	0	0	Doctor	1	1	1	Doctor	1	1	1	Nurse	1	1	0
Midline	20	islam	Secondary & higher(9+ Class)	1	Business	3.18483	Richest	1	1	1	0	1	1	Doctor	1	0	0	Doctor	1	1	0	Nurse	1	1	1
Midline	29	islam	Primary(1-5 Class)	3	Farming/Fishing/SL	1.57947	Middle	0	0	0	0	0	0	PCSBA	1	0	0	TTBA	0	0	0		0	0	0
Midline	23	islam	Primary(1-5 Class)	1	Business	1.20833	Poorer	1	1	0	0	0	1	PCSBA	1	0	0	Nurse	1	1	1		0	0	0
Midline	25	islam	Junior secondary(6-8 class)	1	DL/R/VP/TW	3.1595	Richest	1	0	0	0	0	0	Doctor	1	0	0	Doctor	1	1	1	Doctor	1	1	0
Midline	28	islam	No formal education	2	DL/R/VP/TW	0.0932281	Poorest	1	0	0	0	0	0		0	0	0	TTBA	0	0	0	Drug Seller	0	0	0
Midline	24	islam	Primary(1-5 Class)	1	DL/R/VP/TW	2.3983	Richer	1	0	0	0	0	0	Doctor	1	0	1	Doctor	1	1	1	Nurse	1	1	0
Midline	27	islam	No formal education	5	DL/R/VP/TW	1.18135	Poorer	1	0	0	0	0	0		0	0	0	TBA	0	0	0		0	0	0
Midline	22	islam	No formal education	1	DL/R/VP/TW	2.51565	Richer	0	0	0	0	0	0	Doctor	1	0	0	Doctor	1	1	0	Doctor	1	1	0
Midline	24	islam	Primary(1-5 Class)	2	Farming/Fishing/SL	3.11825	Richest	1	1	1	0	1	1	Doctor	1	0	0	Doctor	1	1	0	Doctor	1	1	0
Midline	38	islam	Primary(1-5 Class)	10	DL/R/VP/TW	1.30351	Poorer	1	0	0	0	0	0	PCSBA	1	0	0	Nurse	1	1	0	Nurse	1	1	0
Midline	32	islam	Primary(1-5 Class)	5	DL/R/VP/TW	1.13867	Poorer	1	1	0	0	0	1		0	0	1	TBA	0	0	0		0	0	0
Midline	29	islam	Secondary & higher(9+ Class)	3	Service/Overseas worker	3.1595	Richest	1	1	0	0	0	1	Doctor	1	0	0	Doctor	1	1	0	Nurse	1	1	0
Midline	29	islam	No formal education	3	Farming/Fishing/SL	0.62905	Poorest	1	0	0	0	0	0	PCSBA	1	0	0	Nurse	1	1	0		0	0	0
Midline	20	islam	No formal education	1	Others	3.1595	Richest	1	1	0	0	0	1	PCSBA	1	0	0	PCSBA	0	1	0	PCSBA	1	1	0
Midline	20	islam	Primary(1-5 Class)	1	Farming/Fishing/SL	1.7592	Middle	0	0	0	0	0	0	Nurse	1	0	0	Others	0	0	1	Nurse	1	1	0
Midline	37	islam	No formal education	2	Farming/Fishing/SL	2.45521	Richer	0	0	0	0	0	0		0	0	0	TTBA	0	0	0		0	0	0
Midline	43	islam	No formal education	3	Service/Overseas worker	2.96117	Richest	0	0	0	0	0	0		0	0	0	Nurse	1	1	0	Nurse	1	1	0
Midline	25	islam	Secondary & higher(9+ Class)	2	Others	3.37299	Richest	0	0	1	0	0	0	Doctor	1	0	0	TBA	0	0	0		0	0	0
Midline	31	islam	No formal education	8	Farming/Fishing/SL	3.17904	Richest	0	0	0	0	0	0	Doctor	1	0	1	Doctor	1	1	0	Doctor	1	1	0
Midline	20	islam	No formal education	3	DL/R/VP/TW	2.13755	Richer	1	0	1	0	0	1	Doctor	1	0	0	PCSBA	0	1	1		0	0	0
Midline	26	islam	Primary(1-5 Class)	2	Farming/Fishing/SL	2.22268	Richer	1	0	0	1	0	1	Doctor	1	0	0	Doctor	1	1	0	Doctor	1	1	0
Midline	31	islam	Primary(1-5 Class)	2	Service/Overseas worker	2.45521	Richer	1	1	0	1	1	1	Doctor	1	1	1	TTBA	0	0	0		0	0	0
Midline	24	islam	Primary(1-5 Class)	1	DL/R/VP/TW	2.34485	Richer	1	1	0	0	0	1	Doctor	1	1	0	TTBA	0	0	0	Doctor	1	1	1
Midline	19	islam	Primary(1-5 Class)	2	Farming/Fishing/SL	2.3983	Richer	1	0	0	0	0	0	Doctor	1	0	1	TTBA	0	0	1		0	0	0
Midline	25	islam	Junior secondary(6-8 class)	2	Service/Overseas worker	2.87226	Richest	0	0	0	0	0	0	Doctor	1	0	1	Doctor	1	1	0	Doctor	1	1	0
Midline	31	islam	No formal education	4	Farming/Fishing/SL	2.3983	Richer	1	1	0	0	0	1	Doctor	1	1	0	Nurse	1	1	1	Nurse	1	1	0
Midline	18	islam	Primary(1-5 Class)	1	DL/R/VP/TW	2.03709	Middle	1	0	0	0	0	0	PCSBA	1	0	1	Nurse	1	1	0	Nurse	1	1	0
Midline	21	islam	Junior secondary(6-8 class)	1	DL/R/VP/TW	2.96555	Richest	1	1	0	0	0	1	Doctor	1	0	0	Doctor	1	1	0		0	0	0
Midline	24	islam	Primary(1-5 Class)	2	Service/Overseas worker	2.36142	Richer	1	0	0	0	0	0	Doctor	1	0	0	TBA	0	0	1		0	0	0
Midline	22	islam	Primary(1-5 Class)	1	DL/R/VP/TW	2.01735	Middle	0	0	0	0	0	0	Doctor	1	0	1	TBA	0	0	0		0	0	0
Midline	23	islam	Junior secondary(6-8 class)	2	Farming/Fishing/SL	3.02196	Richest	1	0	0	0	0	0	Nurse	1	0	0	Nurse	1	1	0	Nurse	1	1	0
Midline	17	islam	Primary(1-5 Class)	1	DL/R/VP/TW	2.3983	Richer	1	1	0	1	1	1		0	0	1	Nurse	1	1	1	Doctor	1	1	0
Midline	19	islam	Primary(1-5 Class)	1	DL/R/VP/TW	2.21301	Richer	1	0	1	0	0	1	Doctor	1	0	1	TTBA	0	0	1		0	0	0
Midline	20	islam	No formal education	2	Farming/Fishing/SL	2.17634	Richer	1	0	0	0	0	0		0	0	0	Nurse	1	1	1		0	0	0
Midline	30	islam	Primary(1-5 Class)	5	DL/R/VP/TW	1.52905	Poorer	0	0	0	0	0	0		0	0	0	TBA	0	0	0	Drug Seller	0	0	0
Midline	24	islam	Primary(1-5 Class)	2	DL/R/VP/TW	2.12656	Richer	1	1	0	0	0	1		0	0	0	TTBA	0	0	0		0	0	0
Midline	30	islam	Junior secondary(6-8 class)	3	Business	3.32551	Richest	1	1	0	0	0	1	Doctor	1	0	1	Doctor	1	1	0	Nurse	1	1	0
Midline	27	islam	No formal education	2	DL/R/VP/TW	0.357319	Poorest	0	0	0	0	0	0		0	0	1	TTBA	0	0	0	Drug Seller	0	0	1
Midline	21	islam	Primary(1-5 Class)	1	Service/Overseas worker	1.29757	Poorer	1	0	0	0	0	0	Doctor	1	0	0	Doctor	1	1	0	Doctor	1	1	0
Midline	28	islam	Secondary & higher(9+ Class)	4	Farming/Fishing/SL	2.22749	Richer	1	1	1	1	1	1	Doctor	1	0	1	TBA	0	0	0	CHCP	1	1	0
Midline	33	islam	Junior secondary(6-8 class)	4	Farming/Fishing/SL	1.337	Poorer	0	1	0	0	0	0	Doctor	1	0	0	TBA	0	0	0		0	0	0
Midline	25	islam	Primary(1-5 Class)	2	Farming/Fishing/SL	2.22749	Richer	0	0	0	0	0	0	PCSBA	1	0	0	TBA	0	0	0		0	0	0
Midline	27	islam	Junior secondary(6-8 class)	2	Farming/Fishing/SL	1.13867	Poorer	0	1	0	1	0	1	Doctor	1	0	0	TBA	0	0	0	Doctor	1	0	1
Midline	38	islam	Primary(1-5 Class)	6	Farming/Fishing/SL	1.21446	Poorer	1	0	0	1	0	1	Doctor	1	0	0	TTBA	0	0	0		0	0	0
Midline	32	islam	Primary(1-5 Class)	4	Service/Overseas worker	3.17466	Richest	1	1	0	1	1	1		0	0	0	Others	0	0	0		0	0	0
Midline	21	islam	Secondary & higher(9+ Class)	1	Business	3.23545	Richest	1	1	0	1	1	1	Doctor	1	0	0	Others	0	0	0		0	0	0
Midline	22	islam	Primary(1-5 Class)	1	DL/R/VP/TW	2.3983	Richer	0	0	0	0	0	0	Doctor	1	0	0	Others	0	0	0		0	0	0
Midline	25	islam	Junior secondary(6-8 class)	2	Farming/Fishing/SL	2.3983	Richer	0	1	1	1	1	1	PCSBA	1	0	0	TBA	0	0	0		0	0	0
Midline	21	islam	Secondary & higher(9+ Class)	1	DL/R/VP/TW	2.26411	Richer	1	0	0	0	0	0	Doctor	1	0	0	Nurse	1	1	0		0	0	0
Midline	18	islam	Primary(1-5 Class)	1	Business	2.22749	Richer	1	1	0	0	0	1	Doctor	1	0	0	Nurse	1	1	0	Nurse	1	1	0
Midline	33	islam	No formal education	4	DL/R/VP/TW	2.13505	Richer	1	0	0	0	0	0	Doctor	1	0	0	PCSBA	0	1	0		0	0	0
Midline	20	islam	Junior secondary(6-8 class)	2	DL/R/VP/TW	2.26785	Richer	1	0	0	0	0	0	PCSBA	1	0	0	TBA	0	0	0		0	0	0
Midline	30	islam	Primary(1-5 Class)	5	Business	2.3983	Richer	0	0	0	1	0	0	CHCP	0	0	0	PCSBA	0	1	0		0	0	0
Midline	21	islam	Primary(1-5 Class)	1	Farming/Fishing/SL	3.1613	Richest	1	0	0	0	0	0	Doctor	1	0	0	Doctor	1	1	1	Doctor	1	1	0
Midline	32	islam	Primary(1-5 Class)	3	Service/Overseas worker	3.07563	Richest	1	1	1	0	1	1	Doctor	1	0	0	Doctor	1	1	0	Doctor	1	1	0
Midline	25	islam	No formal education	3	Farming/Fishing/SL	2.62121	Richest	1	1	0	0	0	1		0	0	0	TTBA	0	0	0		0	0	0
Midline	21	islam	Primary(1-5 Class)	1	Farming/Fishing/SL	2.56314	Richer	1	1	0	0	0	1	Doctor	1	0	1	Doctor	1	1	1	Doctor	1	1	0
Midline	20	islam	Primary(1-5 Class)	1	Farming/Fishing/SL	2.98071	Richest	1	1	0	0	0	1	Doctor	1	0	0	TTBA	0	0	1	Drug Seller	0	0	1
Midline	22	islam	Junior secondary(6-8 class)	1	Service/Overseas worker	2.77663	Richest	1	1	0	0	0	1	Doctor	1	1	0	Doctor	1	1	0	Doctor	1	1	0
Midline	34	islam	No formal education	5	DL/R/VP/TW	0.174409	Poorest	0	0	0	0	0	0		0	0	0	TBA	0	0	0		0	0	0
Midline	18	islam	Junior secondary(6-8 class)	1	Business	2.93945	Richest	1	1	1	1	1	1	Doctor	1	1	0	Nurse	1	1	1	Doctor	1	1	0
Midline	28	islam	Primary(1-5 Class)	6	DL/R/VP/TW	0.0932281	Poorest	1	1	1	0	1	1	Doctor	1	0	1	TBA	0	0	0		0	0	0
Midline	22	islam	Secondary & higher(9+ Class)	2	Service/Overseas worker	3.17904	Richest	1	1	1	0	1	1	Doctor	1	0	0	TBA	0	0	0		0	0	0
Midline	21	islam	Junior secondary(6-8 class)	1	Service/Overseas worker	2.77663	Richest	0	0	0	0	0	0	Doctor	1	0	1	TTBA	0	0	0	Doctor	1	1	0
Midline	24	islam	No formal education	3	Others	1.74431	Middle	1	0	1	0	0	1	Doctor	1	0	1	TTBA	0	0	0	Drug Seller	0	0	1
Midline	25	islam	Primary(1-5 Class)	2	DL/R/VP/TW	2.3477	Richer	1	0	0	0	0	0	Doctor	1	0	0	TBA	0	0	0		0	0	0
Midline	31	islam	Primary(1-5 Class)	3	Business	2.18	Richer	0	0	0	0	0	0	PCSBA	1	0	0	TBA	0	0	0		0	0	0
Midline	29	islam	No formal education	3	Farming/Fishing/SL	1.62339	Middle	0	0	0	0	0	0	PCSBA	1	0	0	TBA	0	0	0		0	0	0
Midline	27	islam	Primary(1-5 Class)	4	Farming/Fishing/SL	2.98071	Richest	1	0	0	0	0	0	Doctor	1	0	1	TBA	0	0	1		0	0	0
Midline	30	islam	Primary(1-5 Class)	2	Others	2.56314	Richer	1	0	0	0	0	0	Doctor	1	0	1	TBA	0	0	0		0	0	0
Midline	22	islam	Primary(1-5 Class)	1	Farming/Fishing/SL	2.45521	Richer	1	0	0	0	0	0	Doctor	1	0	1	Doctor	1	1	1	Doctor	1	0	0
Midline	25	islam	Primary(1-5 Class)	4	DL/R/VP/TW	0.585047	Poorest	1	1	1	0	1	1		0	0	0	Others	0	0	0		0	0	0
Midline	21	islam	Junior secondary(6-8 class)	1	Farming/Fishing/SL	3.03137	Richest	1	0	0	0	0	0		0	0	0	TBA	0	0	0	Drug Seller	0	0	0
Midline	20	hindu	No formal education	1	Farming/Fishing/SL	1.5018	Poorer	1	0	0	0	0	0	Drug Seller	0	0	1	TBA	0	0	1		0	0	0
Midline	27	islam	No formal education	3	Farming/Fishing/SL	2.52381	Richer	1	0	0	0	0	0		0	0	0	TBA	0	0	0	TBA/TTBA	0	0	0
Midline	31	islam	Secondary & higher(9+ Class)	3	Business	3.10309	Richest	1	0	0	0	0	0	Doctor	1	0	0	Nurse	1	1	1	Doctor	1	1	0
Midline	24	islam	Primary(1-5 Class)	3	Farming/Fishing/SL	2.81955	Richest	1	1	0	0	0	1	Doctor	1	1	0	Doctor	1	1	1	Doctor	1	1	0
Midline	23	islam	No formal education	2	DL/R/VP/TW	1.81687	Middle	1	1	0	0	0	1	Doctor	1	0	0	TTBA	0	0	0		0	0	0
Midline	23	islam	No formal education	1	DL/R/VP/TW	1.7611	Middle	1	0	0	0	0	0	Doctor	1	1	0	Nurse	1	1	1		0	0	1
Midline	24	islam	No formal education	1	Farming/Fishing/SL	2.86669	Richest	1	0	0	0	0	0	Doctor	1	0	0	PCSBA	0	1	0		0	0	0
Midline	31	islam	No formal education	2	Farming/Fishing/SL	1.51417	Poorer	0	1	0	0	0	0		0	0	0	Nurse	1	1	0	Nurse	1	1	0
Midline	27	islam	Secondary & higher(9+ Class)	1	Service/Overseas worker	3.37299	Richest	1	1	0	0	0	1	Doctor	1	0	0	Doctor	1	1	0		0	0	0
Midline	30	islam	Primary(1-5 Class)	3	DL/R/VP/TW	1.56299	Poorer	1	1	0	0	0	1	PCSBA	1	1	1	TBA	0	0	0		0	0	0
Midline	24	islam	Primary(1-5 Class)	3	Business	2.96284	Richest	0	0	0	0	0	0		0	0	0	TBA	0	0	0		0	0	0
Midline	25	islam	Primary(1-5 Class)	2	DL/R/VP/TW	1.81713	Middle	0	0	0	0	0	0	PCSBA	1	0	0	TBA	0	0	0		0	0	0
Midline	23	islam	Primary(1-5 Class)	1	DL/R/VP/TW	2.23692	Richer	0	0	0	0	0	0	PCSBA	1	0	0	PCSBA	0	1	0		0	0	0
Midline	23	islam	Primary(1-5 Class)	2	DL/R/VP/TW	2.51565	Richer	1	0	0	0	0	0	Doctor	1	1	0	TBA	0	0	0	Doctor	1	0	0
Midline	30	islam	No formal education	5	Farming/Fishing/SL	1.7718	Middle	1	0	0	0	0	0		0	0	0	TBA	0	0	0		0	0	0
Midline	23	islam	Primary(1-5 Class)	2	DL/R/VP/TW	2.36192	Richer	1	0	0	0	0	0		0	0	0	TBA	0	0	0		0	0	1
Midline	24	islam	Secondary & higher(9+ Class)	1	Farming/Fishing/SL	3.1595	Richest	1	1	0	0	0	1	Doctor	1	1	0	Doctor	1	1	1	Doctor	1	1	0
Midline	25	islam	Primary(1-5 Class)	2	DL/R/VP/TW	1.12148	Poorer	1	0	1	0	0	1	PCSBA	1	0	0	PCSBA	0	1	0		0	0	1
Midline	28	islam	Primary(1-5 Class)	2	Farming/Fishing/SL	3.20879	Richest	1	1	0	0	0	1	Doctor	1	0	0	Doctor	1	1	0	Doctor	1	1	0
Midline	18	islam	Primary(1-5 Class)	2	DL/R/VP/TW	0.186513	Poorest	0	0	0	0	0	0		0	0	0	TBA	0	0	0		0	0	0
Midline	32	islam	No formal education	5	DL/R/VP/TW	2.13918	Richer	1	0	0	0	0	0	PCSBA	1	0	1	TBA	0	0	0		0	0	1
Midline	20	islam	Primary(1-5 Class)	1	DL/R/VP/TW	1.94261	Middle	0	0	0	0	0	0	PCSBA	1	0	0	PCSBA	0	1	0	PCSBA	1	1	0
Midline	23	islam	Primary(1-5 Class)	3	DL/R/VP/TW	2.26963	Richer	0	0	0	0	0	0	Nurse	1	0	0	TBA	0	0	0		0	0	1
Midline	27	islam	No formal education	3	DL/R/VP/TW	1.92406	Middle	0	0	0	0	0	0	PCSBA	1	0	0	TTBA	0	0	0		0	0	0
Midline	21	islam	Primary(1-5 Class)	2	DL/R/VP/TW	2.3983	Richer	1	1	0	0	0	1	Doctor	1	1	0	Doctor	1	1	0	Doctor	1	1	0
Midline	30	islam	Primary(1-5 Class)	5	Farming/Fishing/SL	1.74561	Middle	0	0	0	0	0	0	Drug Seller	0	0	1	TTBA	0	0	1	Drug Seller	0	0	1
Midline	20	islam	Secondary & higher(9+ Class)	1	Service/Overseas worker	3.01032	Richest	1	1	0	0	0	1	Doctor	1	1	0	Doctor	1	1	0	Doctor	1	1	0
Midline	40	islam	No formal education	5	DL/R/VP/TW	0.458244	Poorest	1	0	0	1	0	1		0	0	0	TBA	0	0	0		0	0	0
Midline	26	islam	No formal education	2	Farming/Fishing/SL	2.3983	Richer	1	0	0	0	0	0	Doctor	1	0	1	TTBA	0	0	1		0	0	0
Midline	28	islam	No formal education	5	DL/R/VP/TW	1.46837	Poorer	1	0	1	0	0	1	Doctor	1	1	0	PCSBA	0	1	0		0	0	0
Midline	30	islam	Primary(1-5 Class)	3	Farming/Fishing/SL	3.50727	Richest	1	1	0	0	0	1		0	0	0	Nurse	1	1	0	Doctor	1	1	0
Midline	20	islam	Secondary & higher(9+ Class)	1	Farming/Fishing/SL	2.09207	Middle	1	0	1	0	0	1		0	0	0	TTBA	0	0	0		0	0	1
Midline	27	islam	Primary(1-5 Class)	2	Farming/Fishing/SL	2.45521	Richer	0	0	0	0	0	0	Doctor	1	1	1	TTBA	0	0	0	Doctor	1	0	1
Midline	27	islam	Primary(1-5 Class)	5	Service/Overseas worker	2.65354	Richest	0	0	1	0	0	0	PCSBA	1	0	1	TBA	0	0	1		0	0	1
Midline	27	islam	Primary(1-5 Class)	5	Farming/Fishing/SL	2.12656	Richer	1	0	0	0	0	0	Doctor	1	1	0	TBA	0	0	0	Drug Seller	0	0	0
Midline	33	islam	Junior secondary(6-8 class)	2	DL/R/VP/TW	2.3983	Richer	1	0	0	0	0	0	Doctor	1	1	0	Doctor	1	1	0	Doctor	1	1	0
Midline	21	islam	Primary(1-5 Class)	1	Farming/Fishing/SL	3.31658	Richest	1	1	0	0	0	1	Doctor	1	0	1	Doctor	1	1	1	Doctor	1	1	0
Midline	22	islam	No formal education	2	Farming/Fishing/SL	2.56314	Richer	1	0	0	0	0	0	Doctor	1	0	0	Doctor	1	1	0	Doctor	1	1	0
Midline	27	islam	Primary(1-5 Class)	3	Service/Overseas worker	2.3983	Richer	1	0	0	0	0	0	Doctor	1	0	0	TBA	0	0	0	Doctor	1	0	1
Midline	24	islam	Primary(1-5 Class)	3	DL/R/VP/TW	2.22749	Richer	1	0	1	0	0	1	Doctor	1	0	1	Others	0	0	0	Doctor	1	0	1
Midline	26	islam	No formal education	4	Service/Overseas worker	2.3983	Richer	1	1	1	0	1	1	Doctor	1	1	0	Nurse	1	1	1		0	0	0
Midline	24	islam	Primary(1-5 Class)	3	Farming/Fishing/SL	1.62201	Middle	0	0	0	0	0	0		0	0	0	TBA	0	0	0		0	0	0
Midline	21	islam	Secondary & higher(9+ Class)	1	Business	2.70995	Richest	0	0	0	0	0	0	Doctor	1	1	1	Doctor	1	1	1	Nurse	1	1	0
Midline	20	islam	Primary(1-5 Class)	1	Service/Overseas worker	2.70995	Richest	0	1	0	0	0	0	Doctor	1	1	0	Nurse	1	1	1	Nurse	1	1	0
Midline	18	islam	Primary(1-5 Class)	1	Business	1.68186	Middle	1	0	0	0	0	0		0	0	1	Nurse	1	1	1		0	0	0
Midline	23	islam	Primary(1-5 Class)	2	Service/Overseas worker	2.56314	Richer	0	0	0	0	0	0	PCSBA	1	0	0	TBA	0	0	0		0	0	0
Midline	20	islam	Primary(1-5 Class)	1	DL/R/VP/TW	1.84046	Middle	1	1	0	0	0	1	Nurse	1	1	1	TBA	0	0	0	CHCP	1	0	1
Midline	24	islam	Primary(1-5 Class)	1	Service/Overseas worker	1.68452	Middle	0	0	0	0	0	0	Doctor	1	0	0	TBA	0	0	0	Drug Seller	0	0	0
Midline	23	islam	Secondary & higher(9+ Class)	1	Others	3.42728	Richest	0	0	0	0	0	0	Doctor	1	0	0	Doctor	1	1	1	Nurse	1	1	0
Midline	20	islam	Primary(1-5 Class)	1	DL/R/VP/TW	2.86669	Richest	1	1	0	0	0	1	Doctor	1	0	1	TTBA	0	0	0		0	0	0
Midline	15	islam	Secondary & higher(9+ Class)	1	Service/Overseas worker	3.44249	Richest	1	1	1	0	1	1	Doctor	1	0	0	Doctor	1	1	0	Nurse	1	1	0
Midline	36	islam	Primary(1-5 Class)	3	Farming/Fishing/SL	2.76722	Richest	1	0	0	0	0	0	Doctor	1	1	1	TTBA	0	0	0	Doctor	1	1	0
Midline	26	islam	Primary(1-5 Class)	2	DL/R/VP/TW	2.44098	Richer	1	1	0	0	0	1	PCSBA	1	0	0	TBA	0	0	0		0	0	0
Midline	21	islam	Primary(1-5 Class)	1	DL/R/VP/TW	2.26963	Richer	1	1	0	0	0	1	Doctor	1	0	1	Doctor	1	1	0	Doctor	1	1	0
Midline	25	islam	Junior secondary(6-8 class)	2	Business	3.17908	Richest	0	1	0	0	0	0	Doctor	1	0	0	TTBA	0	0	0		0	0	1
Midline	25	islam	No formal education	4	DL/R/VP/TW	0.84912	Poorest	1	0	0	0	0	0		0	0	0	TTBA	0	0	0		0	0	1
Midline	32	islam	Primary(1-5 Class)	3	DL/R/VP/TW	2.35081	Richer	0	0	0	0	0	0		0	0	0	TBA	0	0	0		0	0	0
Midline	31	islam	Primary(1-5 Class)	3	DL/R/VP/TW	2.22749	Richer	1	0	0	0	0	0	Doctor	1	0	0	TBA	0	0	0		0	0	0
Midline	27	islam	Primary(1-5 Class)	3	DL/R/VP/TW	2.67837	Richest	1	1	0	1	1	1	Doctor	1	0	1	TBA	0	0	0		0	0	0
Midline	22	islam	Primary(1-5 Class)	1	Farming/Fishing/SL	1.93168	Middle	1	0	0	1	0	1	Doctor	1	0	0	TTBA	0	0	0	Doctor	1	1	0
Midline	27	islam	Primary(1-5 Class)	5	Business	1.99952	Middle	1	0	0	0	0	0	Doctor	1	0	1	Nurse	1	1	0		0	0	1
Midline	23	islam	Junior secondary(6-8 class)	2	Business	3.3318	Richest	1	0	0	0	0	0		0	0	0	Others	0	0	0		0	0	0
Midline	33	islam	Primary(1-5 Class)	3	Service/Overseas worker	3.36587	Richest	1	1	0	1	1	1	Doctor	1	0	0	Nurse	1	1	0	Nurse	1	1	1
Midline	25	islam	No formal education	1	Service/Overseas worker	2.45521	Richer	1	1	0	0	0	1	Doctor	1	0	1	Doctor	1	1	0	Doctor	1	1	0
Midline	22	islam	Junior secondary(6-8 class)	3	DL/R/VP/TW	2.85727	Richest	1	0	0	0	0	0	Doctor	1	1	0	Nurse	1	1	0	Nurse	1	1	0
Midline	24	islam	Secondary & higher(9+ Class)	2	Service/Overseas worker	3.42547	Richest	1	1	0	0	0	1	Doctor	1	0	0	Nurse	1	1	0		0	0	0
Midline	26	islam	Junior secondary(6-8 class)	1	Farming/Fishing/SL	3.01032	Richest	1	1	0	0	0	1	Doctor	1	1	1	TTBA	0	0	0		0	0	0
Midline	25	islam	Junior secondary(6-8 class)	3	DL/R/VP/TW	1.36336	Poorer	0	0	0	0	0	0		0	0	1	TBA	0	0	0		0	0	1
Midline	30	islam	Junior secondary(6-8 class)	3	Business	2.90476	Richest	1	0	0	0	0	0	Doctor	1	0	1	Doctor	1	1	0	Doctor	1	1	0
Midline	40	islam	No formal education	11	DL/R/VP/TW	1.06986	Poorer	1	0	0	0	0	0	PCSBA	1	0	1	Doctor	1	1	1	Doctor	1	0	0
Midline	15	islam	Junior secondary(6-8 class)	1	DL/R/VP/TW	1.19023	Poorer	1	1	0	0	0	1	PCSBA	1	0	0	PCSBA	0	1	0		0	0	0
Midline	28	islam	No formal education	4	Farming/Fishing/SL	2.73201	Richest	1	1	0	0	0	1	PCSBA	1	0	1	PCSBA	0	1	0		0	0	0
Midline	32	islam	No formal education	4	Farming/Fishing/SL	1.25087	Poorer	1	1	0	0	0	1	PCSBA	1	0	0	Nurse	1	1	0	Nurse	1	1	0
Midline	21	islam	Primary(1-5 Class)	1	Farming/Fishing/SL	2.61179	Richest	0	0	0	0	0	0	PCSBA	1	0	0	Others	0	0	0		0	0	0
Midline	22	islam	No formal education	3	Farming/Fishing/SL	2.65354	Richest	0	1	0	0	0	0	Doctor	1	0	1	PCSBA	0	1	1	PCSBA	1	1	1
Midline	22	islam	Primary(1-5 Class)	1	Farming/Fishing/SL	3.43957	Richest	1	0	0	0	0	0	Doctor	1	0	0	Doctor	1	1	1	Doctor	1	1	0
Midline	23	islam	Junior secondary(6-8 class)	3	Service/Overseas worker	2.81968	Richest	1	0	0	0	0	0	Doctor	1	1	0	Doctor	1	1	0	Nurse	1	1	0
Midline	25	islam	Primary(1-5 Class)	2	DL/R/VP/TW	2.22749	Richer	1	1	0	0	0	1	Doctor	1	0	0	TBA	0	0	0		0	0	0
Midline	26	islam	Secondary & higher(9+ Class)	2	Farming/Fishing/SL	2.77663	Richest	1	0	0	0	0	0	Doctor	1	0	0	Doctor	1	1	0	Nurse	1	1	1
Midline	19	islam	Junior secondary(6-8 class)	1	Service/Overseas worker	2.92091	Richest	1	0	0	0	0	0	Doctor	1	0	0	TTBA	0	0	0		0	0	0
Midline	21	islam	Secondary & higher(9+ Class)	1	Farming/Fishing/SL	2.81788	Richest	1	0	0	0	0	0	Doctor	1	1	0	Doctor	1	1	0	Nurse	1	1	0
Midline	23	islam	Junior secondary(6-8 class)	2	Service/Overseas worker	3.32899	Richest	1	0	0	0	0	0	Doctor	1	0	0	Nurse	1	1	1	TBA/TTBA	0	0	0
Midline	23	islam	Secondary & higher(9+ Class)	1	Service/Overseas worker	2.60237	Richest	1	1	0	0	0	1	Doctor	1	1	0	Doctor	1	1	0	Doctor	1	1	0
Midline	23	islam	Primary(1-5 Class)	2	DL/R/VP/TW	2.85941	Richest	1	0	0	0	0	0	Doctor	1	0	0	TBA	0	0	0		0	0	0
Midline	27	islam	Primary(1-5 Class)	3	DL/R/VP/TW	2.34006	Richer	1	0	0	0	0	0		0	0	0	TBA	0	0	0		0	0	1
Midline	32	islam	Secondary & higher(9+ Class)	4	Farming/Fishing/SL	2.81587	Richest	1	0	0	0	0	0	PCSBA	1	0	0	Nurse	1	1	0		0	0	0
Midline	27	islam	Junior secondary(6-8 class)	2	Farming/Fishing/SL	3.10369	Richest	1	0	0	0	0	0	PCSBA	1	0	0	TBA	0	0	0	Drug Seller	0	0	0
Midline	21	islam	Primary(1-5 Class)	1	DL/R/VP/TW	2.71398	Richest	1	1	0	0	0	1	Doctor	1	0	0	Doctor	1	1	1	Nurse	1	1	0
Midline	36	islam	No formal education	7	DL/R/VP/TW	3.11201	Richest	0	0	0	0	0	0	Doctor	1	0	0	TBA	0	0	0		0	0	0
Midline	33	hindu	No formal education	3	Farming/Fishing/SL	0.980231	Poorer	0	0	0	0	0	0	Doctor	1	0	0	TBA	0	0	0		0	0	0
Midline	20	islam	Junior secondary(6-8 class)	1	Business	3.37299	Richest	1	1	1	0	1	1	Doctor	1	1	1	Doctor	1	1	1	Nurse	1	1	0
Midline	28	islam	Junior secondary(6-8 class)	3	Service/Overseas worker	3.1767	Richest	0	0	0	0	0	0	Doctor	1	1	0	Nurse	1	1	0	Doctor	1	1	0
Midline	28	islam	Primary(1-5 Class)	2	DL/R/VP/TW	2.36142	Richer	1	1	0	0	0	1		0	0	0	TTBA	0	0	0	Drug Seller	0	0	0
Midline	18	islam	Primary(1-5 Class)	1	DL/R/VP/TW	2.56314	Richer	0	0	0	0	0	0	PCSBA	1	0	0	PCSBA	0	1	0		0	0	0
Midline	34	islam	Primary(1-5 Class)	5	DL/R/VP/TW	2.73395	Richest	1	0	0	0	0	0		0	0	0	TTBA	0	0	0		0	0	0
Midline	38	islam	Primary(1-5 Class)	4	Others	0.357319	Poorest	0	0	0	0	0	0	Doctor	1	0	1	TTBA	0	0	0		0	0	0
Midline	22	islam	Junior secondary(6-8 class)	1	DL/R/VP/TW	2.18219	Richer	0	0	0	0	0	0	Doctor	1	1	1	Doctor	1	1	1	Doctor	1	1	0
Midline	30	islam	Primary(1-5 Class)	5	Farming/Fishing/SL	0.757716	Poorest	0	0	0	0	0	0	Doctor	1	0	1	Doctor	1	1	1		0	0	0
Midline	21	islam	Secondary & higher(9+ Class)	1	Business	2.56314	Richer	0	0	0	0	0	0	Doctor	1	0	1	Doctor	1	1	1	Doctor	1	1	0
Midline	29	islam	Junior secondary(6-8 class)	3	Farming/Fishing/SL	2.76722	Richest	1	1	1	0	1	1	Doctor	1	1	1	Nurse	1	1	0	Nurse	1	1	1
Midline	25	islam	Primary(1-5 Class)	2	Farming/Fishing/SL	2.79683	Richest	0	0	0	0	0	0		0	0	0	TTBA	0	0	0	Drug Seller	0	0	0
Midline	26	islam	Junior secondary(6-8 class)	2	Others	2.45521	Richer	1	1	0	0	0	1	Doctor	1	0	0	TBA	0	0	0	Drug Seller	0	0	0
Midline	19	islam	Primary(1-5 Class)	1	Others	2.90476	Richest	1	1	0	0	0	1	Doctor	1	0	0	Doctor	1	1	0	Doctor	1	1	0
Midline	30	islam	Primary(1-5 Class)	3	Others	3.43245	Richest	1	1	0	1	1	1		0	0	1	TBA	0	0	1		0	0	0
Midline	23	islam	Junior secondary(6-8 class)	2	DL/R/VP/TW	2.97496	Richest	1	1	0	0	0	1		0	0	0	TBA	0	0	0		0	0	0
Midline	27	islam	No formal education	3	DL/R/VP/TW	0.967861	Poorer	0	0	0	0	0	0		0	0	0	Others	0	0	0		0	0	0
Midline	25	islam	Primary(1-5 Class)	2	Others	2.84339	Richest	1	0	0	0	0	0		0	0	0	TBA	0	0	0		0	0	0
Midline	28	islam	Primary(1-5 Class)	2	DL/R/VP/TW	2.62972	Richest	1	0	0	1	0	1	Doctor	1	0	0	TBA	0	0	0		0	0	0
Midline	22	islam	Primary(1-5 Class)	2	DL/R/VP/TW	2.3983	Richer	1	0	0	0	0	0	Doctor	1	0	0	TBA	0	0	0		0	0	0
Midline	27	islam	Primary(1-5 Class)	3	DL/R/VP/TW	0.62905	Poorest	1	0	0	0	0	0	Doctor	1	0	0	TTBA	0	0	0		0	0	1
Midline	34	islam	No formal education	3	DL/R/VP/TW	2.03516	Middle	1	0	0	0	0	0	Doctor	1	0	1	TBA	0	0	0		0	0	1
Midline	24	islam	Primary(1-5 Class)	2	DL/R/VP/TW	1.84654	Middle	1	1	0	1	1	1	Other	0	0	1	TTBA	0	0	0		0	0	0
Midline	22	islam	Secondary & higher(9+ Class)	2	Farming/Fishing/SL	3.10309	Richest	0	0	0	0	0	0	Doctor	1	0	0	TBA	0	0	0		0	0	0
Midline	18	islam	Primary(1-5 Class)	1	Service/Overseas worker	3.1595	Richest	1	1	0	0	0	1	Doctor	1	1	1	Doctor	1	1	0	Doctor	1	1	1
Midline	20	islam	Primary(1-5 Class)	2	DL/R/VP/TW	1.01	Poorer	1	1	0	0	0	1	Doctor	1	0	0	Nurse	1	1	0	Doctor	1	1	0
Midline	28	hindu	Secondary & higher(9+ Class)	1	Business	3.31658	Richest	1	1	1	0	1	1	Doctor	1	0	1	Doctor	1	1	1	Nurse	1	1	1
Midline	39	islam	No formal education	6	DL/R/VP/TW	1.5018	Poorer	1	1	0	0	0	1	PCSBA	1	1	0	Nurse	1	1	1	Nurse	1	1	0
Midline	20	hindu	Junior secondary(6-8 class)	1	Service/Overseas worker	0.967861	Poorer	1	0	0	0	0	0	Drug Seller	0	0	0	TTBA	1	0	1		0	0	0
Midline	29	islam	Secondary & higher(9+ Class)	3	Business	2.86396	Richest	1	1	1	0	1	1	Doctor	1	0	0	Others	0	0	0		0	0	0
Midline	23	islam	Secondary & higher(9+ Class)	1	Business	3.44591	Richest	1	1	1	0	1	1	Doctor	1	1	1	Doctor	1	1	1	Doctor	1	1	0
Midline	20	islam	Primary(1-5 Class)	1	Farming/Fishing/SL	1.5018	Poorer	0	0	0	0	0	0	Doctor	1	1	1	TBA	0	0	1		0	0	1
Midline	21	islam	Primary(1-5 Class)	1	DL/R/VP/TW	2.3983	Richer	0	0	0	0	0	0	Doctor	1	1	1	PCSBA	0	1	1	PCSBA	1	0	1
Midline	29	islam	Primary(1-5 Class)	4	Business	2.35081	Richer	1	1	1	0	1	1	PCSBA	1	1	1	PCSBA	0	1	0	PCSBA	1	1	0
Midline	28	islam	Primary(1-5 Class)	4	DL/R/VP/TW	2.01735	Middle	1	1	0	0	0	1		0	0	0	Nurse	1	1	1		0	0	1
Midline	24	hindu	Junior secondary(6-8 class)	3	Business	3.12504	Richest	0	0	0	1	0	0	Doctor	1	1	1	Others	0	0	0		0	0	0
Midline	17	islam	Primary(1-5 Class)	1	DL/R/VP/TW	0.824294	Poorest	0	0	0	1	0	0		0	0	0	TTBA	0	0	0		0	0	0
Midline	26	islam	Junior secondary(6-8 class)	4	Farming/Fishing/SL	2.97496	Richest	1	0	0	0	0	0	Other	0	0	0	TBA	0	0	0		0	0	1
Midline	25	islam	Junior secondary(6-8 class)	1	Farming/Fishing/SL	2.31444	Richer	1	1	0	0	0	1	PCSBA	1	1	0	TBA	0	0	0	Drug Seller	0	0	0
Midline	26	islam	Primary(1-5 Class)	4	DL/R/VP/TW	2.27834	Richer	1	0	0	0	0	0		0	0	1	Doctor	1	1	0	Doctor	1	1	0
Midline	32	islam	No formal education	4	Business	1.67088	Middle	1	1	0	0	0	1	PCSBA	1	1	0	Nurse	1	1	0		0	0	0
Midline	29	islam	Junior secondary(6-8 class)	5	Farming/Fishing/SL	2.33432	Richer	1	0	0	0	0	0	PCSBA	1	0	1	TBA	0	0	0		0	0	0
Midline	25	islam	Primary(1-5 Class)	2	Farming/Fishing/SL	2.86717	Richest	1	1	0	0	0	1	Doctor	1	1	0	TBA	0	0	0		0	0	1
Midline	22	islam	Junior secondary(6-8 class)	2	Farming/Fishing/SL	2.81147	Richest	0	0	0	0	0	0	Nurse	1	1	1	Doctor	1	1	1	Doctor	1	1	1
Midline	20	islam	Primary(1-5 Class)	1	DL/R/VP/TW	2.3983	Richer	0	1	0	0	0	0	PCSBA	1	1	1	Others	0	0	0		0	0	0
Midline	20	islam	No formal education	2	DL/R/VP/TW	2.22749	Richer	1	0	0	0	0	0	Doctor	1	0	0	Nurse	1	1	1		0	0	0
Midline	28	islam	Primary(1-5 Class)	5	Farming/Fishing/SL	2.3983	Richer	0	0	0	0	0	0	PCSBA	1	1	0	PCSBA	0	1	0	PCSBA	1	1	0
Midline	23	islam	Primary(1-5 Class)	2	DL/R/VP/TW	0.73827	Poorest	0	0	0	0	0	0	PCSBA	1	1	1	TTBA	0	0	0		0	0	1
Midline	20	islam	Junior secondary(6-8 class)	1	Farming/Fishing/SL	3.50727	Richest	1	1	0	0	0	1	Doctor	1	1	1	Doctor	1	1	1	Doctor	1	1	0
Midline	25	islam	Primary(1-5 Class)	3	Others	2.96117	Richest	0	0	0	0	0	0	PCSBA	1	0	1	TBA	0	0	0		0	0	0
Midline	22	islam	Primary(1-5 Class)	1	DL/R/VP/TW	1.76279	Middle	1	0	0	0	0	0	Doctor	1	0	1	TTBA	0	0	0		0	0	1
Midline	32	hindu	Secondary & higher(9+ Class)	2	Service/Overseas worker	3.17904	Richest	1	0	0	0	0	0	Doctor	1	1	1	Doctor	1	1	0	Doctor	1	1	0
Midline	20	islam	Junior secondary(6-8 class)	1	Farming/Fishing/SL	2.60237	Richest	1	1	0	0	0	1	Doctor	1	0	1	Nurse	1	1	0	Nurse	1	1	0
Midline	24	islam	Junior secondary(6-8 class)	2	Farming/Fishing/SL	2.59663	Richest	1	1	1	0	1	1	Doctor	1	0	0	Others	0	0	0		0	0	0
Midline	27	islam	Secondary & higher(9+ Class)	2	Service/Overseas worker	2.65947	Richest	1	1	0	0	0	1	Doctor	1	1	1	Doctor	1	1	0		0	0	0
Midline	26	islam	Junior secondary(6-8 class)	1	Farming/Fishing/SL	3.1595	Richest	1	1	0	0	0	1	Doctor	1	0	0	Doctor	1	1	0	Doctor	1	1	0
Midline	24	islam	No formal education	2	DL/R/VP/TW	0.315179	Poorest	0	0	0	0	0	0		0	0	0	TTBA	0	0	1		0	0	0
Midline	23	islam	Primary(1-5 Class)	2	DL/R/VP/TW	2.22749	Richer	1	0	0	0	0	0	Doctor	1	0	1	TTBA	0	0	1		0	0	1
Midline	28	islam	Secondary & higher(9+ Class)	3	Business	2.94337	Richest	1	1	0	0	0	1	Doctor	1	0	0	Doctor	1	1	0	Doctor	1	1	0
Midline	30	islam	No formal education	2	DL/R/VP/TW	2.3983	Richer	0	0	0	0	0	0		0	0	0	TTBA	0	0	0		0	0	0
Midline	25	islam	No formal education	1	DL/R/VP/TW	2.03328	Middle	0	0	0	0	0	0	Nurse	1	0	0	Doctor	1	1	0	Doctor	1	1	0
Midline	19	islam	Primary(1-5 Class)	1	Farming/Fishing/SL	2.3983	Richer	1	1	0	0	0	1	Doctor	1	0	0	TBA	0	0	0		0	0	0
Midline	26	islam	Primary(1-5 Class)	2	Service/Overseas worker	3.12325	Richest	1	1	1	0	1	1	Doctor	1	1	1	Doctor	1	1	0	Doctor	1	1	0
Midline	23	islam	Primary(1-5 Class)	1	Farming/Fishing/SL	2.67837	Richest	0	0	0	0	0	0	Doctor	1	0	0	TBA	0	0	0	Drug Seller	0	0	0
Midline	25	islam	No formal education	4	DL/R/VP/TW	2.04766	Middle	1	1	0	0	0	1	Doctor	1	0	0	Nurse	1	1	0	Nurse	1	1	0
Midline	19	islam	Junior secondary(6-8 class)	1	Service/Overseas worker	2.91368	Richest	1	1	1	0	1	1	Doctor	1	0	1	Nurse	1	1	0	Doctor	1	1	1
Midline	16	islam	Primary(1-5 Class)	1	Farming/Fishing/SL	2.52179	Richer	0	0	0	0	0	0	CHCP	0	0	0	TBA	0	0	0		0	0	0
Midline	15	islam	Primary(1-5 Class)	2	Business	3.36907	Richest	1	0	1	0	0	1	Doctor	1	0	0	Doctor	1	1	0	Doctor	1	1	0
Midline	39	islam	Primary(1-5 Class)	8	Business	1.13867	Poorer	1	1	0	0	0	1	Doctor	1	0	1	TBA	0	0	0	Doctor	1	0	1
Midline	30	islam	Primary(1-5 Class)	8	DL/R/VP/TW	1.32565	Poorer	0	0	0	1	0	0	Other	0	0	1	Others	0	0	0		0	0	0
Midline	24	islam	Secondary & higher(9+ Class)	3	DL/R/VP/TW	1.6523	Middle	1	1	0	1	1	1	Doctor	1	0	0	TTBA	0	0	0		0	0	0
Midline	26	islam	Primary(1-5 Class)	5	Business	1.79905	Middle	0	1	1	1	1	1	Other	0	0	0	TTBA	0	0	0		0	0	1
Midline	24	islam	Secondary & higher(9+ Class)	1	Business	3.44249	Richest	1	1	1	0	1	1	Doctor	1	0	0	Doctor	1	1	0	Doctor	1	1	0
Midline	22	islam	Junior secondary(6-8 class)	5	Farming/Fishing/SL	2.03644	Middle	0	1	0	1	0	1	Doctor	1	0	1	TBA	0	0	0		0	0	0
Midline	27	islam	Primary(1-5 Class)	3	Farming/Fishing/SL	2.59183	Richest	1	0	0	0	0	0	PCSBA	1	0	0	TBA	0	0	0		0	0	0
Midline	34	islam	No formal education	8	DL/R/VP/TW	1.02772	Poorer	1	0	0	0	0	0	PCSBA	1	0	1	TBA	0	0	0		0	0	0
Midline	27	islam	No formal education	4	DL/R/VP/TW	1.74561	Middle	1	0	0	1	0	1	PCSBA	1	0	0	Others	0	0	0		0	0	0
Midline	26	islam	Junior secondary(6-8 class)	4	Farming/Fishing/SL	1.90345	Middle	0	0	0	1	0	0	Doctor	1	0	0	Others	0	0	0		0	0	0
Midline	23	islam	Primary(1-5 Class)	3	Service/Overseas worker	1.97239	Middle	1	0	0	0	0	0	Other	0	0	0	TBA	0	0	0		0	0	0
Midline	27	islam	No formal education	4	DL/R/VP/TW	2.3983	Richer	1	0	0	1	0	1	Doctor	1	0	1	TBA	0	0	0		0	0	0
Midline	17	islam	Primary(1-5 Class)	1	Farming/Fishing/SL	1.83917	Middle	1	1	0	0	0	1		0	0	0	TBA	0	0	0		0	0	0
Midline	28	islam	Primary(1-5 Class)	6	DL/R/VP/TW	2.44098	Richer	1	0	0	0	0	0	Other	0	0	0	Nurse	1	1	1	Nurse	1	1	1
Midline	26	islam	Secondary & higher(9+ Class)	1	Farming/Fishing/SL	2.97496	Richest	1	0	0	0	0	0	Doctor	1	1	1	Doctor	1	1	1	Doctor	1	1	0
Midline	27	islam	Junior secondary(6-8 class)	3	Service/Overseas worker	3.04729	Richest	1	0	0	1	0	1	Doctor	1	1	1	TBA	0	0	0	Doctor	1	1	1
Midline	20	islam	Junior secondary(6-8 class)	1	Service/Overseas worker	2.3983	Richer	1	1	0	0	0	1	Doctor	1	1	0	TBA	0	0	0	Doctor	1	0	0
Midline	19	islam	Secondary & higher(9+ Class)	1	Service/Overseas worker	3.11825	Richest	1	0	0	0	0	0	Doctor	1	1	1	Doctor	1	1	1	Doctor	1	1	1
Midline	30	islam	Primary(1-5 Class)	3	Service/Overseas worker	3.16967	Richest	0	1	0	0	0	0	PCSBA	1	0	0	PCSBA	1	1	1		0	0	0
Midline	36	islam	Primary(1-5 Class)	5	Service/Overseas worker	2.41142	Richer	1	0	0	0	0	0	Doctor	1	0	0	TTBA	0	0	0	Doctor	1	0	1
Midline	25	islam	No formal education	2	DL/R/VP/TW	1.68576	Middle	1	1	0	0	0	1	Doctor	1	0	0	TTBA	0	0	0	Doctor	1	0	0
Midline	22	islam	Primary(1-5 Class)	1	Farming/Fishing/SL	2.65354	Richest	0	0	0	1	0	0	Doctor	1	1	1	Doctor	1	1	1	Doctor	1	1	1
Midline	25	islam	Secondary & higher(9+ Class)	2	Service/Overseas worker	2.24077	Richer	1	1	0	0	0	1	Doctor	1	1	1	TBA	0	0	0	Drug Seller	0	0	1
Midline	27	islam	No formal education	5	Business	3.26506	Richest	1	1	0	1	1	1	Other	0	0	0	TTBA	0	0	0	Drug Seller	0	0	0
Midline	32	islam	No formal education	7	DL/R/VP/TW	1.5018	Poorer	0	0	0	0	0	0		0	0	0	TBA	0	0	0		0	0	1
Midline	26	islam	No formal education	4	DL/R/VP/TW	0.549648	Poorest	1	1	0	1	1	1	PCSBA	1	0	0	TTBA	0	0	0		0	0	0
Midline	20	islam	Primary(1-5 Class)	1	DL/R/VP/TW	1.13867	Poorer	0	0	0	0	0	0	Nurse	1	0	0	TBA	0	0	0		0	0	0
Midline	28	islam	No formal education	2	Business	1.95749	Middle	1	1	0	0	0	1	PCSBA	1	0	0	TTBA	0	0	1		0	0	1
Midline	20	islam	Junior secondary(6-8 class)	2	Farming/Fishing/SL	2.56314	Richer	0	1	1	0	0	1	Nurse	1	0	1	PCSBA	0	1	0	PCSBA	1	0	0
Midline	25	islam	Junior secondary(6-8 class)	2	DL/R/VP/TW	2.3983	Richer	1	1	1	1	1	1	Doctor	1	1	0	TBA	0	0	0	PCSBA	1	0	0
Midline	29	islam	No formal education	4	Business	2.40473	Richer	1	1	0	0	0	1	Doctor	1	0	1	TBA	0	0	0		0	0	1
Midline	20	islam	Primary(1-5 Class)	2	DL/R/VP/TW	1.54015	Poorer	1	0	0	0	0	0	Nurse	1	0	0	TBA	0	0	0		0	0	0
Midline	31	islam	No formal education	4	Service/Overseas worker	2.09883	Middle	0	0	0	0	0	0	Doctor	1	0	1	TBA	0	0	0		0	0	1
Midline	25	islam	No formal education	3	DL/R/VP/TW	0.992185	Poorer	0	0	0	0	0	0	PCSBA	1	0	1	Others	0	0	0		0	0	0
Midline	35	islam	No formal education	4	Farming/Fishing/SL	1.40852	Poorer	1	0	0	0	0	0	PCSBA	1	1	0	Others	0	0	0	PCSBA	1	0	0
Midline	23	islam	No formal education	2	Others	2.00997	Middle	1	1	0	1	1	1	PCSBA	1	0	0	TBA	0	0	0		0	0	0
Midline	38	islam	No formal education	6	Business	1.84075	Middle	1	0	0	0	0	0	Nurse	1	0	0	TTBA	0	0	0		0	0	1
Midline	25	islam	No formal education	4	DL/R/VP/TW	1.59435	Middle	0	0	0	0	0	0	Doctor	1	0	0	Others	0	0	0		0	0	0
Midline	31	islam	No formal education	4	DL/R/VP/TW	1.12793	Poorer	0	0	0	0	0	0	PCSBA	1	0	0	TTBA	0	0	1		0	0	0
Midline	23	islam	Primary(1-5 Class)	2	Farming/Fishing/SL	2.77663	Richest	1	1	0	0	0	1	Doctor	1	0	0	TBA	0	0	0		0	0	0
Midline	24	islam	Primary(1-5 Class)	2	DL/R/VP/TW	0.448821	Poorest	1	1	0	1	1	1	Nurse	1	0	0	TBA	0	0	0		0	0	0
Midline	18	islam	Primary(1-5 Class)	1	DL/R/VP/TW	0.515156	Poorest	1	1	0	1	1	1		0	0	0	TBA	0	0	0		0	0	0
Midline	25	islam	Primary(1-5 Class)	2	Service/Overseas worker	3.42228	Richest	1	1	1	0	1	1	Doctor	1	0	0	Doctor	1	1	0	Doctor	1	1	0
Midline	37	islam	Primary(1-5 Class)	8	Business	3.00457	Richest	1	1	0	0	0	1		0	0	1	TTBA	0	0	0	Drug Seller	0	0	1
Midline	24	islam	Junior secondary(6-8 class)	2	Business	2.3983	Richer	1	1	0	0	0	1	PCSBA	1	0	0	PCSBA	0	1	0	PCSBA	1	0	0
Midline	29	islam	Primary(1-5 Class)	5	Business	3.10309	Richest	0	0	0	0	0	0	PCSBA	1	0	1	PCSBA	0	1	1		0	0	0
Midline	24	islam	Primary(1-5 Class)	2	Service/Overseas worker	3.4375	Richest	1	1	0	0	0	1	Doctor	1	1	0	Doctor	1	1	0	Doctor	1	1	0
Midline	19	islam	Primary(1-5 Class)	2	DL/R/VP/TW	2.3983	Richer	1	0	0	0	0	0		0	0	0	TBA	0	0	0		0	0	1
Midline	23	islam	Junior secondary(6-8 class)	2	Business	2.6687	Richest	1	1	1	1	1	1	Doctor	1	0	0	TBA	0	0	0		0	0	0
Midline	29	islam	Junior secondary(6-8 class)	3	DL/R/VP/TW	1.39085	Poorer	0	0	0	0	0	0	Other	0	0	0	TTBA	0	0	0		0	0	0
Midline	20	islam	No formal education	1	DL/R/VP/TW	0.438499	Poorest	0	0	0	0	0	0		0	0	0	Nurse	1	1	0	Doctor	1	1	1
Midline	26	islam	Primary(1-5 Class)	3	DL/R/VP/TW	2.73992	Richest	0	0	0	1	0	0	Other	0	0	0	TTBA	0	0	0		0	0	1
Midline	25	islam	No formal education	2	DL/R/VP/TW	1.48152	Poorer	1	1	0	1	1	1	Doctor	1	0	0	TBA	0	0	0		0	0	0
Midline	28	islam	Primary(1-5 Class)	3	Farming/Fishing/SL	2.60237	Richest	1	0	0	1	0	1	Doctor	1	0	0	TTBA	0	0	0		0	0	0
Midline	20	islam	No formal education	2	DL/R/VP/TW	2.13421	Richer	1	1	0	1	1	1	Other	0	0	0	TTBA	0	0	0		0	0	1
Midline	23	islam	No formal education	2	Farming/Fishing/SL	1.32262	Poorer	0	0	0	1	0	0	PCSBA	1	0	0	TBA	0	0	1		0	0	1
Midline	20	islam	No formal education	1	Business	2.61179	Richest	0	0	0	0	0	0	Nurse	1	0	1	TBA	0	0	1		0	0	0
Midline	24	islam	Primary(1-5 Class)	2	Farming/Fishing/SL	2.81587	Richest	1	0	0	1	0	1	PCSBA	1	0	0	TTBA	0	0	0	PCSBA	1	0	0
Midline	27	islam	No formal education	4	DL/R/VP/TW	0.73827	Poorest	0	0	0	0	0	0		0	0	0	TBA	0	0	0		0	0	1
Midline	34	islam	Primary(1-5 Class)	6	Service/Overseas worker	2.97134	Richest	1	0	0	1	0	1	Other	0	0	0	Others	0	0	0		0	0	0
Midline	26	islam	Primary(1-5 Class)	3	Business	2.22749	Richer	1	0	0	1	0	1	Other	0	0	0	TTBA	0	0	0		0	0	0
Midline	22	islam	Primary(1-5 Class)	2	DL/R/VP/TW	0.967861	Poorer	0	0	0	1	0	0	PCSBA	1	0	0	PCSBA	0	1	0		0	0	0
Midline	17	islam	Junior secondary(6-8 class)	1	Business	2.95939	Richest	1	0	0	1	0	1	Other	0	0	1	TTBA	0	0	1		0	0	0
Midline	25	islam	Junior secondary(6-8 class)	3	Farming/Fishing/SL	2.35081	Richer	0	0	0	1	0	0	Doctor	1	0	1	TTBA	0	0	0		0	0	1
Midline	20	islam	Junior secondary(6-8 class)	1	Farming/Fishing/SL	1.25732	Poorer	0	0	0	0	0	0	PCSBA	1	0	1	TBA	0	0	0		0	0	0
Midline	18	islam	Junior secondary(6-8 class)	1	Business	2.82805	Richest	0	0	0	0	0	0		0	0	0	TBA	0	0	0		0	0	0
Midline	23	islam	Secondary & higher(9+ Class)	2	Business	2.57629	Richest	1	0	0	0	0	0	Doctor	1	0	1	TTBA	0	0	1		0	0	0
Midline	20	islam	Primary(1-5 Class)	1	DL/R/VP/TW	1.95749	Middle	1	0	0	0	0	0		0	0	1	Nurse	0	1	1	Drug Seller	0	0	1
Midline	31	islam	No formal education	4	DL/R/VP/TW	0.757716	Poorest	0	1	0	1	0	1	PCSBA	1	1	0	TTBA	0	0	0		0	0	0
Midline	31	islam	Primary(1-5 Class)	6	Farming/Fishing/SL	1.30774	Poorer	1	1	0	0	0	1	Doctor	1	1	1	TBA	0	0	0		0	0	1
Midline	25	islam	No formal education	5	DL/R/VP/TW	1.57947	Middle	1	1	0	0	0	1	Other	0	0	0	TBA	0	0	1		0	0	0
Midline	24	islam	Secondary & higher(9+ Class)	1	Service/Overseas worker	2.77663	Richest	1	0	0	0	0	0	Doctor	1	1	0	PCSBA	0	1	1	PCSBA	1	1	0
Midline	19	islam	Primary(1-5 Class)	1	Farming/Fishing/SL	2.23692	Richer	1	1	0	1	1	1	Doctor	1	0	0	TTBA	0	0	1		0	0	1
Midline	29	islam	No formal education	3	DL/R/VP/TW	0.800402	Poorest	1	0	0	1	0	1	Nurse	1	0	1	TTBA	0	0	0		0	0	0
Midline	19	islam	Primary(1-5 Class)	2	Farming/Fishing/SL	1.39085	Poorer	1	0	0	1	0	1	Doctor	1	0	1	TTBA	0	0	1		0	0	1
Midline	34	islam	No formal education	7	Business	2.6687	Richest	0	0	0	0	0	0		0	0	0	TBA	0	0	1		0	0	0
Midline	23	islam	Primary(1-5 Class)	2	Farming/Fishing/SL	2.28775	Richer	0	0	0	0	0	0	Other	0	0	0	Others	0	0	1		0	0	0
Midline	25	islam	Primary(1-5 Class)	3	DL/R/VP/TW	0.765521	Poorest	1	0	0	0	0	0	Nurse	1	0	0	TTBA	0	0	0		0	0	0
Midline	28	islam	Primary(1-5 Class)	4	DL/R/VP/TW	2.3983	Richer	1	0	0	1	0	1	Doctor	1	0	0	TTBA	0	0	0		0	0	0
Midline	34	islam	Primary(1-5 Class)	5	Others	1.92406	Middle	1	1	0	0	0	1	Doctor	1	0	0	TTBA	0	0	0		0	0	0
Midline	23	islam	Primary(1-5 Class)	2	Farming/Fishing/SL	1.75326	Middle	1	1	0	0	0	1	Doctor	1	0	0	TBA	0	0	0		0	0	0
Midline	29	islam	No formal education	4	DL/R/VP/TW	2.22749	Richer	0	1	0	1	0	1	Other	0	0	0	TTBA	0	0	0		0	0	0
Midline	34	islam	No formal education	5	Farming/Fishing/SL	2.13421	Richer	1	1	0	1	1	1	Doctor	1	0	0	TTBA	0	0	0		0	0	0
Midline	24	islam	Secondary & higher(9+ Class)	2	Business	3.45479	Richest	1	0	0	1	0	1	Doctor	1	0	0	TTBA	0	0	0		0	0	0
Midline	18	islam	Primary(1-5 Class)	1	DL/R/VP/TW	1.19852	Poorer	0	1	0	1	0	1	Doctor	1	1	1	TBA	0	0	0		0	0	0
Midline	24	islam	Secondary & higher(9+ Class)	1	Service/Overseas worker	3.31658	Richest	1	1	1	0	1	1	Doctor	1	1	0	Doctor	1	1	1	Doctor	1	1	0
Midline	19	islam	Primary(1-5 Class)	2	Others	0.879305	Poorest	1	0	0	0	0	0		0	0	0	TTBA	0	0	1		0	0	1
Midline	21	islam	Junior secondary(6-8 class)	2	Business	3.06673	Richest	1	0	0	1	0	1	Other	0	0	0	TTBA	0	0	0		0	0	0
Midline	23	islam	Secondary & higher(9+ Class)	1	Service/Overseas worker	2.93866	Richest	1	1	1	1	1	1	Doctor	1	1	0	PCSBA	0	1	0	PCSBA	1	0	1
Midline	28	islam	Secondary & higher(9+ Class)	4	Service/Overseas worker	3.03083	Richest	0	1	0	1	0	1	Doctor	1	1	1	Doctor	1	1	1	Doctor	1	0	1
Midline	24	islam	No formal education	4	Business	2.99466	Richest	1	0	0	1	0	1	Other	0	0	0	TBA	0	0	0	Other	0	0	1
Midline	26	islam	No formal education	1	DL/R/VP/TW	2.86703	Richest	1	0	0	0	0	0	Doctor	1	0	1	Doctor	1	1	1	Doctor	1	1	0
Midline	22	islam	Primary(1-5 Class)	2	DL/R/VP/TW	2.3983	Richer	0	0	0	0	0	0	Nurse	1	0	1	TBA	0	0	1		0	0	0
Midline	23	islam	Primary(1-5 Class)	2	DL/R/VP/TW	1.5018	Poorer	1	1	0	0	0	1	PCSBA	1	0	1	Others	0	0	0		0	0	0
Midline	33	islam	Primary(1-5 Class)	7	Others	2.51565	Richer	1	0	0	0	0	0	PCSBA	1	0	1	TTBA	0	0	0		0	0	1
Midline	29	islam	Primary(1-5 Class)	3	Farming/Fishing/SL	2.17098	Richer	1	0	0	1	0	1	PCSBA	1	0	1	TTBA	0	0	0		0	0	0
Midline	25	islam	No formal education	2	Others	2.3983	Richer	1	0	1	0	0	1	PCSBA	1	0	1	TTBA	0	0	0		0	0	0
Midline	31	islam	No formal education	4	DL/R/VP/TW	0.458244	Poorest	1	1	1	0	1	1	PCSBA	1	1	0	TTBA	0	0	0	Doctor	1	0	1
Midline	18	islam	Primary(1-5 Class)	1	DL/R/VP/TW	1.46075	Poorer	0	0	0	1	0	0	Nurse	1	0	0	PCSBA	0	1	1		0	0	0
Midline	20	islam	No formal education	1	Business	2.59663	Richest	0	1	0	0	0	0	Other	0	0	0	TBA	0	0	0		0	0	0
Midline	20	islam	No formal education	3	DL/R/VP/TW	0.303868	Poorest	1	0	0	1	0	1		0	0	0	TBA	0	0	0		0	0	0
Midline	22	islam	No formal education	2	DL/R/VP/TW	2.85762	Richest	1	1	0	1	1	1	PCSBA	1	0	0	Others	0	0	1		0	0	0
Midline	20	islam	Primary(1-5 Class)	1	Others	1.39585	Poorer	1	0	0	0	0	0	Other	0	0	0	TBA	0	0	0		0	0	0
Midline	14	islam	Primary(1-5 Class)	3	DL/R/VP/TW	1.98018	Middle	1	1	0	1	1	1	Other	0	0	0	Others	0	0	0		0	0	0
Midline	21	islam	Primary(1-5 Class)	3	DL/R/VP/TW	2.35081	Richer	0	0	0	0	0	0	Nurse	1	0	1	TBA	0	0	0		0	0	1
Midline	21	islam	Primary(1-5 Class)	1	Service/Overseas worker	2.10753	Middle	1	0	0	1	0	1	Doctor	1	0	1	PCSBA	0	1	0		0	0	0
Midline	25	islam	No formal education	4	DL/R/VP/TW	1.08474	Poorer	1	0	0	0	0	0	Doctor	1	0	0	Others	0	0	0		0	0	0
Midline	20	islam	Primary(1-5 Class)	2	DL/R/VP/TW	1.57654	Middle	1	1	0	0	0	1	PCSBA	1	0	0	TBA	0	0	0		0	0	0
Midline	23	islam	Primary(1-5 Class)	2	Farming/Fishing/SL	1.42355	Poorer	1	1	0	0	0	1	PCSBA	1	0	0	Others	0	0	0		0	0	0
Midline	33	islam	Primary(1-5 Class)	4	Business	3.0769	Richest	0	0	0	0	0	0	Doctor	1	0	0	TTBA	0	0	0		0	0	0
Midline	28	islam	Primary(1-5 Class)	2	DL/R/VP/TW	2.25208	Richer	1	0	0	0	0	0		0	0	0	TBA	0	0	0		0	0	0
Midline	21	islam	Secondary & higher(9+ Class)	1	DL/R/VP/TW	2.76147	Richest	1	1	0	0	0	1	Doctor	1	1	1	Doctor	1	1	0	Doctor	1	1	0
Midline	20	islam	Primary(1-5 Class)	4	DL/R/VP/TW	1.57654	Middle	0	1	0	0	0	0		0	0	1	TBA	0	0	0		0	0	0
Midline	21	islam	Primary(1-5 Class)	1	Farming/Fishing/SL	1.58663	Middle	1	0	0	0	0	0	Other	0	0	0	TBA	0	0	0		0	0	0
Midline	31	islam	No formal education	6	Farming/Fishing/SL	1.94261	Middle	0	0	0	1	0	0	PCSBA	1	0	0	PCSBA	0	1	0		0	0	0
Midline	21	islam	No formal education	2	Farming/Fishing/SL	1.01	Poorer	1	0	0	0	0	0		0	0	0	TTBA	0	0	0		0	0	0
Midline	23	islam	Secondary & higher(9+ Class)	2	Business	2.59663	Richest	0	0	0	1	0	0	Other	0	0	0	PCSBA	0	1	0		0	0	0
Midline	26	islam	Secondary & higher(9+ Class)	2	Business	3.44069	Richest	1	0	0	0	0	0	Doctor	1	1	1	Doctor	1	1	0	Nurse	1	1	1
Midline	25	islam	No formal education	6	Farming/Fishing/SL	1.97579	Middle	1	1	0	0	0	1	PCSBA	1	1	0	PCSBA	0	1	0		0	0	0
Midline	16	islam	Junior secondary(6-8 class)	1	Business	3.24124	Richest	1	0	0	0	0	0	Doctor	1	0	0	Others	0	0	0		0	0	0
Midline	29	islam	No formal education	5	Farming/Fishing/SL	1.9211	Middle	1	0	0	0	0	0	Doctor	1	0	1	TBA	0	0	0		0	0	1
Midline	19	islam	Primary(1-5 Class)	1	DL/R/VP/TW	2.59663	Richest	0	0	0	1	0	0		0	0	0	TTBA	0	0	0		0	0	1
Midline	30	islam	Primary(1-5 Class)	5	Farming/Fishing/SL	1.57947	Middle	0	0	0	0	0	0		0	0	0	TBA	0	0	0	Doctor	1	0	1
Midline	26	islam	Secondary & higher(9+ Class)	2	Service/Overseas worker	2.53806	Richer	1	0	0	0	0	0	Doctor	1	1	1	Doctor	1	1	0	Doctor	1	1	0
Midline	18	islam	Primary(1-5 Class)	1	Business	2.61179	Richest	1	0	0	0	0	0	Doctor	1	0	1	Others	0	0	1	Other	0	0	1
Midline	35	islam	No formal education	6	Business	3.31658	Richest	0	0	0	0	0	0	Doctor	1	0	0	TBA	0	0	0		0	0	0
Midline	37	islam	No formal education	5	Business	3.00589	Richest	0	0	0	0	0	0		0	0	0	TBA	0	0	0		0	0	0
Midline	25	islam	No formal education	2	Farming/Fishing/SL	2.6687	Richest	1	0	0	0	0	0	Other	0	0	0	TBA	0	0	0		0	0	0
Midline	20	islam	Junior secondary(6-8 class)	1	Farming/Fishing/SL	2.22749	Richer	1	1	1	0	1	1	Doctor	1	0	0	Nurse	1	1	1	Nurse	1	1	0
Midline	29	islam	Junior secondary(6-8 class)	5	DL/R/VP/TW	2.61179	Richest	1	0	0	0	0	0	PCSBA	1	0	0	TBA	0	0	0		0	0	0
Midline	20	islam	Primary(1-5 Class)	1	Farming/Fishing/SL	1.84654	Middle	0	0	0	1	0	0	PCSBA	1	0	1	TBA	0	0	0		0	0	1
Midline	39	islam	No formal education	7	Farming/Fishing/SL	2.93825	Richest	1	0	0	0	0	0	PCSBA	1	0	1	TBA	0	0	0		0	0	1
Midline	28	islam	Secondary & higher(9+ Class)	3	Farming/Fishing/SL	3.16754	Richest	0	0	0	0	0	0	Nurse	1	1	0	PCSBA	0	1	0	PCSBA	1	0	0
Midline	30	islam	No formal education	8	DL/R/VP/TW	2.09883	Middle	0	0	1	0	0	0	Doctor	1	0	1	TBA	0	0	1		0	0	1
Midline	26	islam	Primary(1-5 Class)	4	Business	2.71398	Richest	0	1	1	0	0	1	Nurse	1	1	1	Nurse	0	1	0		0	0	0
Midline	25	islam	Primary(1-5 Class)	3	DL/R/VP/TW	0.539425	Poorest	0	0	0	0	0	0	Other	0	0	1	TBA	0	0	0		0	0	1
Midline	19	islam	Primary(1-5 Class)	1	DL/R/VP/TW	1.57654	Middle	0	1	0	0	0	0		0	0	0	TTBA	0	0	0		0	0	0
Midline	33	islam	Primary(1-5 Class)	6	DL/R/VP/TW	2.00919	Middle	0	1	0	0	0	0	Nurse	1	1	1	TTBA	0	0	0		0	0	0
Midline	32	islam	Primary(1-5 Class)	7	Business	3.20865	Richest	1	0	0	0	0	0	Doctor	1	0	1	TBA	0	0	0		0	0	1
Midline	22	islam	Junior secondary(6-8 class)	2	Farming/Fishing/SL	1.74561	Middle	1	1	0	0	0	1		0	0	0	TBA	0	0	0		0	0	0
Midline	23	islam	Primary(1-5 Class)	3	DL/R/VP/TW	2.01735	Middle	0	1	0	1	0	1	Doctor	1	1	1	TTBA	0	0	0	Doctor	1	0	1
Midline	18	islam	Primary(1-5 Class)	2	DL/R/VP/TW	0.485985	Poorest	1	0	0	1	0	1	Doctor	1	0	0	Others	0	0	0	Other	0	0	0
Midline	18	islam	Secondary & higher(9+ Class)	1	Business	3.39222	Richest	1	0	0	0	0	0	Doctor	1	0	1	TTBA	0	0	0	Doctor	1	0	1
Midline	32	islam	Primary(1-5 Class)	6	Business	2.64663	Richest	0	0	0	0	0	0	Doctor	1	0	1	Others	0	0	0		0	0	0
Midline	24	islam	Primary(1-5 Class)	3	Business	0.883212	Poorest	1	1	0	0	0	1		0	0	0	TTBA	0	0	0		0	0	0
Midline	24	islam	No formal education	3	Business	2.3983	Richer	0	1	0	0	0	0	PCSBA	1	0	0	TTBA	0	0	0		0	0	0
Midline	32	hindu	Junior secondary(6-8 class)	6	DL/R/VP/TW	1.39085	Poorer	0	1	0	1	0	1	Nurse	1	0	0	TTBA	0	0	0		0	0	0
Midline	40	islam	Primary(1-5 Class)	9	Farming/Fishing/SL	2.55489	Richer	0	0	0	0	0	0		0	0	1	TBA	0	0	0		0	0	0
Midline	17	islam	Primary(1-5 Class)	1	DL/R/VP/TW	1.18672	Poorer	0	0	0	0	0	0	PCSBA	1	0	0	TBA	0	0	0		0	0	0
Midline	21	islam	Primary(1-5 Class)	4	DL/R/VP/TW	1.57654	Middle	0	0	0	0	0	0	Other	0	0	0	TBA	0	0	0		0	0	0
Midline	22	islam	Primary(1-5 Class)	1	DL/R/VP/TW	2.35081	Richer	0	0	0	0	0	0	Nurse	1	0	1	TTBA	0	0	0		0	0	0
Midline	22	islam	Primary(1-5 Class)	2	Others	0.485985	Poorest	1	0	0	0	0	0	PCSBA	1	0	1	Others	0	0	0		0	0	1
Midline	33	islam	No formal education	8	Business	2.83136	Richest	0	1	0	1	0	1	PCSBA	1	1	0	TBA	0	0	0	Doctor	1	0	0
Midline	32	islam	Primary(1-5 Class)	6	Business	2.10745	Middle	1	0	0	0	0	0	PCSBA	1	0	1	TBA	0	0	0		0	0	0
Midline	33	islam	Primary(1-5 Class)	5	Farming/Fishing/SL	2.90476	Richest	0	0	0	0	0	0	Doctor	1	0	0	Others	0	0	0		0	0	1
Midline	28	islam	Junior secondary(6-8 class)	7	DL/R/VP/TW	1.45432	Poorer	0	0	0	0	0	0		0	0	1	TTBA	0	0	0		0	0	0
Midline	23	islam	Primary(1-5 Class)	4	DL/R/VP/TW	1.25543	Poorer	0	1	0	0	0	0	Other	0	0	1	TTBA	0	0	1	CHCP	1	0	0
Midline	18	islam	Junior secondary(6-8 class)	1	Business	2.46488	Richer	1	1	0	0	0	1		0	0	0	TBA	0	0	1		0	0	0
Midline	33	islam	No formal education	6	DL/R/VP/TW	0.993437	Poorer	0	0	0	0	0	0		0	0	0	Others	0	0	1		0	0	0
Midline	19	islam	Primary(1-5 Class)	1	DL/R/VP/TW	0.315179	Poorest	0	1	0	0	0	0		0	0	0	TTBA	0	0	1		0	0	1
Midline	32	islam	No formal education	6	DL/R/VP/TW	2.2844	Richer	1	1	0	0	0	1	Other	0	0	0	Others	0	0	0	Drug Seller	0	0	1
Midline	18	islam	Primary(1-5 Class)	1	DL/R/VP/TW	2.10957	Middle	1	1	0	0	0	1		0	0	1	TBA	0	0	1		0	0	0
Midline	26	islam	No formal education	5	DL/R/VP/TW	1.57947	Middle	0	0	0	0	0	0		0	0	1	TTBA	0	0	0		0	0	0
Midline	36	islam	Primary(1-5 Class)	8	Farming/Fishing/SL	2.64506	Richest	1	1	0	0	0	1	Doctor	1	0	0	Doctor	1	1	1	Doctor	1	1	0
Midline	24	islam	Primary(1-5 Class)	2	DL/R/VP/TW	2.3983	Richer	0	0	0	0	0	0	Other	0	0	0	Others	0	0	0		0	0	0
Midline	31	islam	No formal education	4	DL/R/VP/TW	2.60237	Richest	1	1	0	1	1	1	PCSBA	1	0	1	TTBA	0	0	0		0	0	0
Midline	18	islam	No formal education	1	DL/R/VP/TW	0.89905	Poorest	1	0	0	0	0	0		0	0	0	TTBA	0	0	0		0	0	0
Midline	27	islam	Primary(1-5 Class)	5	Business	2.65929	Richest	1	1	0	0	0	1	Other	0	0	1	TBA	0	0	0		0	0	0
Midline	30	islam	Primary(1-5 Class)	5	Business	1.77221	Middle	1	1	0	1	1	1	Doctor	1	0	1	Others	0	0	1		0	0	0
Midline	26	islam	Secondary & higher(9+ Class)	3	Service/Overseas worker	2.61179	Richest	0	1	0	0	0	0		0	0	0	Others	0	0	0		0	0	1
Midline	22	islam	Primary(1-5 Class)	2	Farming/Fishing/SL	1.12085	Poorer	0	0	0	1	0	0		0	0	1	TTBA	0	0	0		0	0	0
Midline	30	islam	No formal education	4	DL/R/VP/TW	0.866936	Poorest	1	0	0	1	0	1	Doctor	1	1	0	Others	0	0	0		0	0	1
Midline	30	islam	No formal education	5	DL/R/VP/TW	1.13867	Poorer	1	0	0	0	0	0		0	0	0	Others	0	0	0		0	0	0
Midline	20	hindu	Primary(1-5 Class)	1	Farming/Fishing/SL	1.57654	Middle	1	1	0	0	0	1	Doctor	1	0	0	TTBA	0	0	0		0	0	0
Midline	23	islam	Primary(1-5 Class)	4	DL/R/VP/TW	0.941673	Poorer	1	0	0	0	0	0	PCSBA	1	1	0	TTBA	0	0	0		0	0	0
Midline	18	islam	Junior secondary(6-8 class)	1	DL/R/VP/TW	2.30501	Richer	1	1	1	0	1	1	PCSBA	1	1	1	PCSBA	0	1	0		0	0	0
Midline	35	islam	Primary(1-5 Class)	7	Farming/Fishing/SL	2.57541	Richest	1	0	0	0	0	0	PCSBA	1	0	0	PCSBA	0	1	0		0	0	0
Midline	26	islam	Primary(1-5 Class)	3	Business	2.77375	Richest	1	0	0	0	0	0	PCSBA	1	1	0	PCSBA	0	1	0		0	0	0
Midline	21	islam	Junior secondary(6-8 class)	1	Business	2.39699	Richer	0	0	0	0	0	0	Doctor	1	0	0	TBA	0	0	0		0	0	0
Midline	22	islam	Junior secondary(6-8 class)	3	DL/R/VP/TW	1.74561	Middle	1	1	0	0	0	1	Doctor	1	1	1	TTBA	0	0	0		0	0	1
Midline	20	islam	Primary(1-5 Class)	2	Business	1.84932	Middle	0	1	0	0	0	0	Drug Seller	0	0	0	TTBA	0	0	0		0	0	0
Midline	25	islam	No formal education	2	Farming/Fishing/SL	0.58691	Poorest	0	0	0	0	0	0		0	0	0	TTBA	0	0	0		0	0	0
Midline	16	islam	Primary(1-5 Class)	1	DL/R/VP/TW	0.757716	Poorest	0	0	0	0	0	0		0	0	0	TBA	0	0	0	Drug Seller	0	0	1
Midline	22	islam	Primary(1-5 Class)	4	Business	0.926791	Poorer	0	0	0	0	0	0	PCSBA	1	0	1	TBA	0	0	0		0	0	0
Midline	23	islam	Secondary & higher(9+ Class)	1	Service/Overseas worker	3.0769	Richest	1	0	0	1	0	1	Doctor	1	0	0	TTBA	0	0	0		0	0	0
Midline	19	islam	Secondary & higher(9+ Class)	1	Business	2.78339	Richest	1	1	0	1	1	1	Doctor	1	0	0	TTBA	0	0	0		0	0	0
Midline	37	islam	Primary(1-5 Class)	9	DL/R/VP/TW	1.67852	Middle	0	0	0	0	0	0		0	0	0	TBA	0	0	0		0	0	0
Midline	26	islam	Primary(1-5 Class)	4	Business	2.45521	Richer	1	0	0	0	0	0	Doctor	1	0	1	PCSBA	0	1	1	PCSBA	1	1	0
Midline	20	islam	Primary(1-5 Class)	1	DL/R/VP/TW	1.7967	Middle	1	0	0	0	0	0		0	0	0	Nurse	1	1	0		0	0	0
Midline	29	islam	Secondary & higher(9+ Class)	3	Service/Overseas worker	2.55398	Richer	1	0	0	0	0	0		0	0	0	TBA	0	0	0		0	0	0
Midline	25	islam	No formal education	3	DL/R/VP/TW	0.315179	Poorest	0	0	0	0	0	0	Doctor	1	0	1	TBA	0	0	0		0	0	0
Midline	17	islam	Primary(1-5 Class)	1	DL/R/VP/TW	2.01735	Middle	0	0	0	0	0	0	PCSBA	1	0	0	TTBA	0	0	0		0	0	0
Midline	28	islam	No formal education	3	Business	2.23084	Richer	0	0	0	1	0	0	Doctor	1	0	1	TTBA	0	0	0		0	0	0
Midline	27	islam	Secondary & higher(9+ Class)	4	Business	2.51162	Richer	1	0	0	0	0	0	Doctor	1	0	0	PCSBA	0	1	0	PCSBA	1	0	1
Midline	22	islam	Primary(1-5 Class)	2	DL/R/VP/TW	1.40852	Poorer	0	0	0	0	0	0	Other	0	0	1	TBA	0	0	0		0	0	0
Midline	22	islam	Secondary & higher(9+ Class)	1	DL/R/VP/TW	2.3983	Richer	1	0	0	0	0	0		0	0	0	Others	0	0	1	Other	0	0	1
Midline	33	islam	No formal education	6	DL/R/VP/TW	1.57187	Poorer	0	0	0	0	0	0		0	0	0	TBA	0	0	0		0	0	0
Midline	25	islam	No formal education	3	DL/R/VP/TW	1.79003	Middle	1	1	1	0	1	1	PCSBA	1	0	1	TBA	0	0	0		0	0	1
Midline	26	islam	Primary(1-5 Class)	3	Farming/Fishing/SL	1.40852	Poorer	1	0	0	0	0	0		0	0	0	TBA	0	0	1		0	0	0
Midline	30	islam	Primary(1-5 Class)	5	Business	2.33069	Richer	1	0	0	0	0	0	Other	0	0	1	TTBA	0	0	0		0	0	0
Midline	23	islam	Primary(1-5 Class)	2	DL/R/VP/TW	2.01735	Middle	1	0	0	0	0	0	PCSBA	1	0	0	PCSBA	0	1	0		0	0	0
Midline	25	islam	Primary(1-5 Class)	4	DL/R/VP/TW	1.13679	Poorer	1	0	0	0	0	0	PCSBA	1	0	0	PCSBA	0	1	1	PCSBA	1	0	0
Midline	22	islam	Junior secondary(6-8 class)	2	DL/R/VP/TW	2.03256	Middle	1	0	0	0	0	0	Other	0	0	0	Others	0	0	1		0	0	0
Midline	22	islam	No formal education	3	Business	2.3983	Richer	1	1	0	0	0	1	PCSBA	1	1	1	TBA	0	0	0		0	0	0
Midline	30	islam	No formal education	5	Farming/Fishing/SL	1.88868	Middle	1	0	0	0	0	0	PCSBA	1	0	0	TBA	0	0	0		0	0	0
Midline	19	islam	Primary(1-5 Class)	3	Business	2.45521	Richer	1	0	0	0	0	0	Drug Seller	0	0	0	TBA	0	0	0		0	0	1
Midline	22	islam	Primary(1-5 Class)	3	Business	2.07908	Middle	0	1	0	0	0	0		0	0	1	TTBA	0	0	0		0	0	0
Midline	20	islam	Primary(1-5 Class)	3	DL/R/VP/TW	1.91	Middle	1	0	0	0	0	0	Other	0	0	1	TBA	0	0	1		0	0	0
Midline	26	islam	No formal education	3	DL/R/VP/TW	1.13867	Poorer	0	0	0	0	0	0	CHCP	0	0	0	TBA	0	0	0	Drug Seller	0	0	1
Midline	25	islam	Primary(1-5 Class)	5	Farming/Fishing/SL	1.57654	Middle	1	1	1	0	1	1	Doctor	1	0	1	TTBA	0	0	0		0	0	0
Midline	21	islam	Junior secondary(6-8 class)	2	DL/R/VP/TW	1.84654	Middle	1	0	0	0	0	0		0	0	0	Nurse	1	1	0		0	0	0
Midline	20	islam	Primary(1-5 Class)	1	DL/R/VP/TW	0.671735	Poorest	0	0	0	0	0	0	PCSBA	1	1	0	TBA	0	0	0		0	0	0
Midline	24	islam	No formal education	4	DL/R/VP/TW	0.535765	Poorest	1	0	0	0	0	0	Doctor	1	1	1	Others	0	0	0		0	0	0
Midline	35	islam	No formal education	7	DL/R/VP/TW	0.357319	Poorest	0	0	0	0	0	0		0	0	0	TBA	0	0	0		0	0	0
Midline	22	islam	Junior secondary(6-8 class)	3	DL/R/VP/TW	2.46488	Richer	1	1	0	1	1	1	Doctor	1	0	1	Others	0	0	1		0	0	0
Midline	28	hindu	Secondary & higher(9+ Class)	3	Farming/Fishing/SL	2.18219	Richer	0	1	1	1	1	1	PCSBA	1	1	0	PCSBA	0	1	0	PCSBA	1	1	0
Midline	25	islam	Primary(1-5 Class)	4	Farming/Fishing/SL	2.30501	Richer	0	0	0	0	0	0		0	0	0	TTBA	0	0	0		0	0	0
Midline	22	islam	No formal education	2	DL/R/VP/TW	2.36192	Richer	1	0	0	0	0	0	Doctor	1	0	0	TBA	0	0	0		0	0	0
Midline	26	islam	Primary(1-5 Class)	3	Farming/Fishing/SL	3.17681	Richest	0	1	1	0	0	1	Drug Seller	0	0	1	TBA	0	0	0		0	0	0
Midline	22	islam	No formal education	5	Farming/Fishing/SL	2.10775	Middle	0	0	0	0	0	0		0	0	0	TTBA	0	0	0		0	0	0
Midline	37	islam	No formal education	5	Farming/Fishing/SL	1.52905	Poorer	0	0	0	0	0	0	Other	0	0	1	TBA	0	0	0		0	0	0
Midline	30	islam	Junior secondary(6-8 class)	4	DL/R/VP/TW	1.02772	Poorer	1	0	0	0	0	0	PCSBA	1	0	1	TTBA	0	0	0		0	0	0
Midline	26	islam	No formal education	7	Business	2.35081	Richer	0	0	0	0	0	0	PCSBA	1	0	1	PCSBA	0	1	0		0	0	1
Midline	22	islam	Secondary & higher(9+ Class)	1	Business	2.3983	Richer	0	0	1	1	0	1	Doctor	1	0	1	TBA	1	0	0		0	0	1
Midline	23	islam	Primary(1-5 Class)	1	Business	2.41739	Richer	1	0	0	1	0	1	Doctor	1	0	0	Doctor	1	1	1	Doctor	1	1	0
Midline	19	islam	Primary(1-5 Class)	1	DL/R/VP/TW	1.79003	Middle	1	1	0	1	1	1	PCSBA	1	0	1	Others	0	0	1	PCSBA	1	1	1
Midline	21	islam	Junior secondary(6-8 class)	3	DL/R/VP/TW	1.07337	Poorer	0	0	0	0	0	0	Other	0	0	1	TBA	0	0	0	Other	0	0	0
Midline	20	islam	Primary(1-5 Class)	3	DL/R/VP/TW	1.28351	Poorer	0	0	1	0	0	0	PCSBA	1	0	0	PCSBA	0	1	0		0	0	0
Midline	25	islam	Primary(1-5 Class)	5	Business	2.72511	Richest	1	1	0	1	1	1		0	0	0	TBA	0	0	0		0	0	0
Midline	19	islam	Primary(1-5 Class)	1	Business	2.45521	Richer	1	0	0	0	0	0	Other	0	0	0	TBA	0	0	0		0	0	0
Midline	25	islam	Junior secondary(6-8 class)	3	Service/Overseas worker	3.04658	Richest	0	0	0	0	0	0	Doctor	1	0	0	Nurse	0	1	0		0	0	0
Midline	39	islam	No formal education	8	Farming/Fishing/SL	2.45521	Richer	1	0	0	1	0	1	Doctor	1	0	1	TBA	0	0	0		0	0	1
Midline	23	hindu	Secondary & higher(9+ Class)	1	Business	2.60237	Richest	1	1	1	0	1	1	Doctor	1	0	0	Doctor	1	1	1	Doctor	1	1	0
Midline	22	islam	Primary(1-5 Class)	2	DL/R/VP/TW	1.68572	Middle	1	0	0	0	0	0	Other	0	0	0	TBA	0	0	0		0	0	0
Midline	20	islam	Primary(1-5 Class)	1	Others	2.5643	Richer	1	0	0	0	0	0	PCSBA	1	0	0	PCSBA	0	1	0	PCSBA	1	1	0
Midline	25	islam	Primary(1-5 Class)	2	Farming/Fishing/SL	2.45521	Richer	1	0	0	0	0	0		0	0	0	TBA	0	0	0		0	0	0
Midline	25	islam	No formal education	1	DL/R/VP/TW	2.3983	Richer	1	0	0	0	0	0	PCSBA	1	1	1	TBA	0	0	0		0	0	1
Midline	30	islam	Primary(1-5 Class)	2	Business	1.46837	Poorer	1	1	1	0	1	1	Doctor	1	0	1	Doctor	1	1	0	Doctor	1	1	1
Midline	29	islam	No formal education	3	Farming/Fishing/SL	1.40573	Poorer	0	1	0	0	0	0	Doctor	1	0	1	TBA	0	0	0		0	0	1
Midline	24	islam	No formal education	2	DL/R/VP/TW	1.99952	Middle	1	1	0	0	0	1	PCSBA	1	0	0	Others	0	0	0		0	0	0
Midline	38	islam	Primary(1-5 Class)	4	Business	1.94261	Middle	1	1	0	0	0	1	Doctor	1	0	0	TTBA	0	0	0	Drug Seller	0	0	0
Midline	24	islam	Secondary & higher(9+ Class)	1	Farming/Fishing/SL	2.3983	Richer	1	1	0	0	0	1	Doctor	1	1	0	TTBA	0	0	0	PCSBA	1	0	0
Midline	27	islam	Primary(1-5 Class)	5	DL/R/VP/TW	1.39085	Poorer	1	1	0	0	0	1	PCSBA	1	0	1	Others	0	0	0		0	0	1
Midline	19	islam	Primary(1-5 Class)	1	Farming/Fishing/SL	1.74561	Middle	1	0	0	1	0	1	PCSBA	1	0	0	TTBA	0	0	0		0	0	1
Midline	24	islam	Junior secondary(6-8 class)	4	Farming/Fishing/SL	2.01735	Middle	1	0	0	0	0	0		0	0	0	TTBA	0	0	0		0	0	1
Midline	40	islam	No formal education	6	Business	1.40852	Poorer	1	0	0	0	0	0	PCSBA	1	0	1	Drug Seller	0	0	1		0	0	1
Midline	25	islam	Junior secondary(6-8 class)	3	DL/R/VP/TW	1.13867	Poorer	1	0	0	0	0	0		0	0	1	TBA	0	0	0		0	0	0
Midline	22	islam	No formal education	3	Farming/Fishing/SL	1.28993	Poorer	0	0	0	0	0	0	PCSBA	1	0	0	TBA	0	0	0		0	0	0
Midline	21	islam	Primary(1-5 Class)	2	Farming/Fishing/SL	0.550537	Poorest	1	0	0	1	0	1	PCSBA	1	0	0	TTBA	0	0	0		0	0	0
Midline	28	islam	Primary(1-5 Class)	4	Service/Overseas worker	1.94188	Middle	1	1	0	0	0	1	Doctor	1	0	1	TBA	0	0	1	Doctor	1	0	1
Midline	25	islam	Primary(1-5 Class)	2	Business	1.48619	Poorer	1	1	0	0	0	1	Doctor	1	1	1	TTBA	0	0	0	Doctor	1	0	0
Midline	26	islam	No formal education	4	DL/R/VP/TW	2.13421	Richer	1	0	0	0	0	0	PCSBA	1	1	0	TTBA	0	0	0		0	0	0
Midline	21	islam	Primary(1-5 Class)	1	Service/Overseas worker	2.81012	Richest	1	1	1	0	1	1	Doctor	1	1	1	TTBA	0	0	0		0	0	0
Midline	23	islam	Primary(1-5 Class)	3	Service/Overseas worker	1.52022	Poorer	1	1	0	0	0	1	PCSBA	1	0	0	TTBA	0	0	0		0	0	1
Midline	29	islam	No formal education	5	Service/Overseas worker	0.432534	Poorest	0	1	1	1	1	1	Doctor	1	0	0	PCSBA	0	1	1	Other	0	0	0
Midline	25	islam	Junior secondary(6-8 class)	2	Business	2.88742	Richest	1	0	0	0	0	0	Doctor	1	1	0	TBA	0	0	0		0	0	0
Midline	25	islam	Junior secondary(6-8 class)	3	Farming/Fishing/SL	2.22142	Richer	1	0	0	0	0	0	Other	0	0	0	TTBA	0	0	0		0	0	0
Midline	24	islam	Secondary & higher(9+ Class)	2	Service/Overseas worker	2.65929	Richest	1	0	0	0	0	0	Nurse	1	0	1	PCSBA	0	1	0	PCSBA	1	1	0
Midline	25	islam	Primary(1-5 Class)	3	DL/R/VP/TW	1.17776	Poorer	1	0	0	0	0	0	CHCP	0	0	0	TBA	0	0	0	Drug Seller	0	0	0
Midline	24	islam	Junior secondary(6-8 class)	1	Service/Overseas worker	3.17904	Richest	1	1	0	0	0	1	Doctor	1	0	1	Doctor	1	1	1	Doctor	1	1	1
Midline	35	islam	Primary(1-5 Class)	5	Farming/Fishing/SL	0.315179	Poorest	0	0	0	0	0	0		0	0	0	TBA	0	0	0		0	0	0
Midline	38	islam	Primary(1-5 Class)	8	Farming/Fishing/SL	1.74561	Middle	1	0	0	0	0	0	PCSBA	1	0	0	TBA	0	0	0		0	0	0
Midline	32	hindu	Primary(1-5 Class)	3	Farming/Fishing/SL	2.59663	Richest	1	1	0	0	0	1	PCSBA	1	1	0	TBA	0	0	0		0	0	0
Midline	20	islam	No formal education	5	Business	1.95749	Middle	0	0	0	0	0	0	Doctor	1	1	0	PCSBA	0	1	0		0	0	1
Midline	16	hindu	Primary(1-5 Class)	1	Business	1.90623	Middle	1	1	0	0	0	1	Doctor	1	0	1	Others	0	0	1		0	0	0
Midline	22	hindu	Primary(1-5 Class)	1	Farming/Fishing/SL	1.95749	Middle	0	1	0	0	0	0	Doctor	1	0	1	Nurse	1	1	1	Nurse	1	1	0
Midline	22	islam	No formal education	3	DL/R/VP/TW	2.67837	Richest	0	0	0	0	0	0	Other	0	0	1	TTBA	0	0	0		0	0	1
Midline	26	islam	No formal education	4	Farming/Fishing/SL	2.01735	Middle	0	0	1	0	0	0		0	0	0	TBA	0	0	0		0	0	0
Midline	35	islam	No formal education	3	DL/R/VP/TW	1.43577	Poorer	1	0	0	0	0	0	PCSBA	1	0	1	TBA	0	0	0		0	0	0
Midline	33	islam	No formal education	9	DL/R/VP/TW	2.22749	Richer	0	0	0	0	0	0		0	0	1	TBA	0	0	0		0	0	0
Midline	20	islam	Primary(1-5 Class)	1	Service/Overseas worker	2.07426	Middle	1	0	0	0	0	0		0	0	0	TTBA	0	0	0		0	0	0
Midline	26	islam	Primary(1-5 Class)	7	DL/R/VP/TW	2.2844	Richer	1	0	0	0	0	0		0	0	1	TBA	0	0	1		0	0	0
Midline	32	islam	Primary(1-5 Class)	7	Farming/Fishing/SL	1.46837	Poorer	0	0	0	0	0	0		0	0	0	TTBA	0	0	0		0	0	1
Midline	21	islam	Primary(1-5 Class)	3	DL/R/VP/TW	1.48619	Poorer	0	1	0	0	0	0	Doctor	1	1	1	TTBA	0	0	0		0	0	0
Midline	20	islam	Primary(1-5 Class)	1	Business	0.866936	Poorest	0	0	0	0	0	0	Doctor	1	0	0	TBA	0	0	1		0	0	0
Midline	21	islam	Junior secondary(6-8 class)	1	Business	2.61179	Richest	1	1	0	0	0	1	Doctor	1	0	0	TTBA	0	0	0		0	0	0
Midline	21	islam	Primary(1-5 Class)	2	Farming/Fishing/SL	1.95749	Middle	1	0	0	0	0	0	PCSBA	1	0	1	TBA	0	0	0		0	0	1
Midline	35	islam	No formal education	3	DL/R/VP/TW	0.73827	Poorest	1	0	0	0	0	0		0	0	0	TBA	0	0	0		0	0	0
Midline	29	islam	No formal education	3	Business	1.13867	Poorer	1	0	0	0	0	0	Drug Seller	0	0	1	TBA	0	0	0	Drug Seller	1	0	1
Midline	20	islam	Primary(1-5 Class)	1	Farming/Fishing/SL	2.81012	Richest	1	0	0	1	0	1	PCSBA	1	0	0	TTBA	0	0	0		0	0	0
Midline	19	islam	Primary(1-5 Class)	1	Farming/Fishing/SL	2.2908	Richer	1	1	1	0	1	1	Doctor	1	0	0	Nurse	1	1	0	Nurse	1	1	1
Midline	25	islam	Junior secondary(6-8 class)	4	DL/R/VP/TW	2.3983	Richer	1	0	0	0	0	0	Doctor	1	0	1	TTBA	0	0	0		0	0	1
Midline	25	islam	No formal education	3	Farming/Fishing/SL	1.09118	Poorer	1	0	0	0	0	0	Doctor	1	0	1	TBA	0	0	0		0	0	0
Midline	25	islam	Primary(1-5 Class)	5	DL/R/VP/TW	2.45521	Richer	1	1	0	0	0	1	Doctor	1	1	1	PCSBA	0	1	0		0	0	0
Midline	32	islam	Primary(1-5 Class)	4	DL/R/VP/TW	1.71702	Middle	1	1	0	0	0	1	Doctor	1	0	0	TTBA	0	0	0	PCSBA	1	0	0
Midline	34	islam	Primary(1-5 Class)	3	Business	1.5018	Poorer	1	1	0	0	0	1	Doctor	1	0	0	PCSBA	0	1	0		0	0	0
Midline	23	islam	Junior secondary(6-8 class)	1	Business	2.77669	Richest	1	0	0	0	0	0	Doctor	1	1	0	Nurse	1	1	0	Nurse	1	1	0
Midline	30	islam	No formal education	5	Business	2.59663	Richest	1	0	0	0	0	0	Doctor	1	1	1	PCSBA	0	1	0	PCSBA	1	0	0
Midline	18	hindu	Junior secondary(6-8 class)	1	DL/R/VP/TW	2.08672	Middle	1	1	1	1	1	1		0	0	1	Nurse	1	1	1	Nurse	1	1	0
Midline	38	islam	Primary(1-5 Class)	8	Farming/Fishing/SL	2.6687	Richest	1	0	0	0	0	0	Nurse	1	0	0	TBA	0	0	0		0	0	0
Midline	25	hindu	No formal education	2	Farming/Fishing/SL	2.18	Richer	0	0	1	0	0	0	PCSBA	1	0	0	TBA	0	0	0		0	0	0
Midline	22	islam	Primary(1-5 Class)	3	Farming/Fishing/SL	2.30501	Richer	0	0	0	0	0	0		0	0	1	TTBA	0	0	1		0	0	1
Midline	25	islam	Primary(1-5 Class)	6	Farming/Fishing/SL	1.31538	Poorer	0	0	0	0	0	0		0	0	0	TBA	0	0	0		0	0	0
Midline	35	islam	Primary(1-5 Class)	6	DL/R/VP/TW	1.92406	Middle	0	0	0	0	0	0		0	0	1	TTBA	0	0	0		0	0	0
Midline	35	islam	No formal education	7	Farming/Fishing/SL	2.61179	Richest	0	0	0	0	0	0		0	0	0	TTBA	0	0	0		0	0	0
Midline	24	islam	Primary(1-5 Class)	2	Business	2.3983	Richer	1	1	0	0	0	1		0	0	0	Others	0	0	0		0	0	1
Midline	19	islam	Primary(1-5 Class)	3	DL/R/VP/TW	0.535765	Poorest	1	0	0	0	0	0	Drug Seller	0	0	0	TBA	0	0	0		0	0	1
Midline	30	islam	No formal education	6	DL/R/VP/TW	0.664431	Poorest	0	0	0	0	0	0		0	0	0	TTBA	0	0	0		0	0	0
Midline	19	islam	No formal education	1	Business	2.67837	Richest	1	0	0	0	0	0	Doctor	1	0	1	TTBA	0	0	1		0	0	1
Midline	26	islam	Primary(1-5 Class)	2	DL/R/VP/TW	2.59039	Richest	1	0	0	0	0	0	PCSBA	1	0	0	TBA	0	0	1		0	0	0
Midline	22	islam	Secondary & higher(9+ Class)	1	Service/Overseas worker	3.27259	Richest	1	0	0	0	0	0	Doctor	1	0	1	TBA	0	0	0		0	0	0
Midline	24	islam	Primary(1-5 Class)	2	Others	2.3983	Richer	1	0	0	0	0	0	PCSBA	1	0	1	TBA	0	0	1	TBA/TTBA	0	0	1
Midline	31	islam	No formal education	5	DL/R/VP/TW	1.22502	Poorer	1	0	0	1	0	1		0	0	1	Others	0	0	0		0	0	1
Midline	24	islam	Primary(1-5 Class)	6	DL/R/VP/TW	1.57759	Middle	0	0	0	0	0	0		0	0	0	Others	0	0	0		0	0	0
Midline	26	islam	No formal education	5	DL/R/VP/TW	0.84912	Poorest	0	0	0	0	0	0		0	0	0	Others	0	0	0		0	0	0
Midline	28	islam	Primary(1-5 Class)	4	DL/R/VP/TW	1.30351	Poorer	1	0	0	0	0	0	Doctor	1	0	1	Nurse	1	1	1	Other	0	0	0
Midline	25	islam	Primary(1-5 Class)	1	DL/R/VP/TW	1.19558	Poorer	0	0	0	1	0	0		0	0	0	TTBA	0	0	1		0	0	0
Midline	29	islam	No formal education	5	Service/Overseas worker	0.757716	Poorest	0	0	0	0	0	0	PCSBA	1	1	1	Others	0	0	0		0	0	0
Midline	25	islam	Primary(1-5 Class)	2	Farming/Fishing/SL	2.76722	Richest	1	0	0	0	0	0	Doctor	1	1	0	TBA	0	0	0		0	0	0
Midline	19	islam	Primary(1-5 Class)	1	Farming/Fishing/SL	2.566	Richer	1	0	0	1	0	1	PCSBA	1	0	0	TTBA	0	0	0	Drug Seller	0	0	0
Midline	29	islam	Secondary & higher(9+ Class)	4	Farming/Fishing/SL	0.913672	Poorest	1	0	0	1	0	1	TBA/TTBA	0	0	0	Others	0	0	0	Drug Seller	0	0	1
Midline	21	islam	Secondary & higher(9+ Class)	2	Business	2.56314	Richer	1	0	0	0	0	0	Doctor	1	1	1	Nurse	1	1	0	Nurse	1	1	0
Midline	24	islam	Secondary & higher(9+ Class)	2	Farming/Fishing/SL	2.81076	Richest	1	0	0	0	0	0	Doctor	1	1	1	TTBA	0	0	0		0	0	0
Midline	36	hindu	Secondary & higher(9+ Class)	5	Farming/Fishing/SL	2.78457	Richest	1	0	0	0	0	0	Doctor	1	0	1	Doctor	1	1	1	Doctor	1	1	1
Midline	30	islam	Primary(1-5 Class)	4	Farming/Fishing/SL	2.98071	Richest	1	1	0	0	0	1	PCSBA	1	1	0	PCSBA	0	1	0	PCSBA	1	0	0
Midline	22	islam	Primary(1-5 Class)	2	DL/R/VP/TW	2.30501	Richer	0	0	0	0	0	0		0	0	1	Others	0	0	0		0	0	1
Midline	39	islam	No formal education	8	DL/R/VP/TW	1.48619	Poorer	0	0	0	0	0	0	Doctor	1	0	1	PCSBA	0	1	0		0	0	1
Midline	20	hindu	Primary(1-5 Class)	1	Farming/Fishing/SL	0.70835	Poorest	1	1	0	1	1	1	Doctor	1	0	0	TBA	0	0	0		0	0	1
Midline	25	islam	Primary(1-5 Class)	2	DL/R/VP/TW	2.01735	Middle	0	0	0	0	0	0	PCSBA	1	0	0	TTBA	0	0	0		0	0	0
Midline	35	islam	No formal education	7	DL/R/VP/TW	0.967861	Poorer	0	0	0	0	0	0	PCSBA	1	0	0	TBA	0	0	0		0	0	0
Midline	30	islam	Junior secondary(6-8 class)	6	Business	2.566	Richer	1	1	0	0	0	1		0	0	0	PCSBA	0	1	0		0	0	0
Midline	19	islam	Primary(1-5 Class)	2	Others	2.61848	Richest	0	0	0	0	0	0		0	0	0	TTBA	0	0	0		0	0	0
Midline	20	islam	No formal education	2	DL/R/VP/TW	2.11886	Richer	0	0	0	0	0	0		0	0	0	TTBA	0	0	0		0	0	0
Midline	28	islam	Primary(1-5 Class)	3	DL/R/VP/TW	1.56166	Poorer	0	0	0	0	0	0	Doctor	1	0	1	Nurse	1	1	1	Doctor	1	1	0
Midline	22	islam	Primary(1-5 Class)	2	Farming/Fishing/SL	1.77515	Middle	0	0	0	0	0	0	PCSBA	1	0	0	Others	0	0	0		0	0	0
Midline	34	islam	Primary(1-5 Class)	6	DL/R/VP/TW	1.30481	Poorer	0	0	0	0	0	0		0	0	0	Others	0	0	0		0	0	0
Midline	26	islam	No formal education	4	Farming/Fishing/SL	0.581564	Poorest	0	0	0	0	0	0		0	0	0	Others	0	0	0		0	0	0
Midline	19	islam	No formal education	1	Business	2.73528	Richest	1	0	0	0	0	0	Other	0	0	0	Others	0	0	0		0	0	0
Midline	36	islam	No formal education	5	Business	1.5018	Poorer	1	0	0	0	0	0		0	0	0	TBA	0	0	0		0	0	0
Midline	27	islam	Junior secondary(6-8 class)	3	DL/R/VP/TW	1.40852	Poorer	1	0	0	1	0	1	PCSBA	1	0	0	TBA	0	0	0	CHCP	1	1	1
Midline	18	islam	Primary(1-5 Class)	2	Business	1.41794	Poorer	1	0	0	0	0	0	PCSBA	1	0	0	TBA	0	0	0		0	0	0
Midline	31	islam	Primary(1-5 Class)	4	DL/R/VP/TW	2.01735	Middle	1	0	0	0	0	0	Doctor	1	0	1	Nurse	1	1	1	Nurse	1	1	1
Midline	30	islam	Primary(1-5 Class)	4	DL/R/VP/TW	1.59199	Middle	0	0	0	0	0	0	PCSBA	1	0	0	TBA	0	0	0		0	0	0
Midline	30	islam	Primary(1-5 Class)	3	Business	2.53584	Richer	1	0	1	0	0	1	Doctor	1	0	0	TBA	0	0	0		0	0	0
Midline	30	islam	Primary(1-5 Class)	3	Farming/Fishing/SL	0.842541	Poorest	1	0	0	1	0	1	Other	0	0	0	TTBA	0	0	0	Other	0	0	0
Midline	34	islam	Primary(1-5 Class)	3	Farming/Fishing/SL	0.678315	Poorest	1	0	0	0	0	0	Doctor	1	0	1	TBA	0	0	0		0	0	0
Midline	28	islam	No formal education	3	Service/Overseas worker	1.5018	Poorer	0	0	0	0	0	0		0	0	0	TBA	0	0	0		0	0	0
Midline	20	islam	Primary(1-5 Class)	1	DL/R/VP/TW	2.3983	Richer	1	1	1	0	1	1	Doctor	1	0	0	TTBA	0	0	0		0	0	0
Midline	20	islam	Junior secondary(6-8 class)	1	Farming/Fishing/SL	1.07915	Poorer	1	1	0	0	0	1	Doctor	1	0	0	TBA	0	0	0		0	0	0
Midline	19	islam	Junior secondary(6-8 class)	1	Farming/Fishing/SL	2.1347	Richer	1	1	1	0	1	1	Doctor	1	0	0	TBA	0	0	0		0	0	0
Midline	22	islam	Secondary & higher(9+ Class)	1	Service/Overseas worker	2.58785	Richest	1	1	0	0	0	1	Doctor	1	1	1	TBA	0	0	0		0	0	0
Midline	20	islam	Primary(1-5 Class)	2	Farming/Fishing/SL	2.22749	Richer	1	0	0	0	0	0	Doctor	1	0	1	TTBA	0	0	0		0	0	0
Midline	28	islam	No formal education	6	DL/R/VP/TW	1.34042	Poorer	1	0	0	0	0	0		0	0	0	TBA	0	0	1		0	0	0
Midline	38	islam	Secondary & higher(9+ Class)	5	Farming/Fishing/SL	2.01735	Middle	1	0	1	0	0	1	Doctor	1	0	1	TBA	0	0	0		0	0	0
Midline	23	islam	Primary(1-5 Class)	1	Farming/Fishing/SL	2.45521	Richer	1	0	0	0	0	0	Other	0	0	0	Nurse	1	1	0	Nurse	1	1	0
Midline	24	islam	Secondary & higher(9+ Class)	1	Service/Overseas worker	2.66955	Richest	0	0	0	0	0	0	Doctor	1	0	1	TTBA	0	0	0		0	0	0
Midline	21	islam	Secondary & higher(9+ Class)	1	Service/Overseas worker	1.33026	Poorer	1	0	0	0	0	0	PCSBA	1	0	0	TBA	0	0	0		0	0	0
Midline	30	islam	Junior secondary(6-8 class)	6	Farming/Fishing/SL	2.03328	Middle	1	0	0	0	0	0		0	0	0	TBA	0	0	0		0	0	0
Midline	19	islam	Primary(1-5 Class)	1	Farming/Fishing/SL	1.84932	Middle	1	0	0	1	0	1		0	0	1	TTBA	0	0	0	TBA/TTBA	0	0	1
Midline	24	islam	Primary(1-5 Class)	3	Farming/Fishing/SL	1.10524	Poorer	1	1	0	0	0	1		0	0	0	TBA	0	0	0	Drug Seller	0	0	1
Midline	30	islam	Primary(1-5 Class)	4	DL/R/VP/TW	1.7718	Middle	0	0	0	0	0	0		0	0	0	TTBA	0	0	0		0	0	1
Midline	29	islam	Primary(1-5 Class)	7	DL/R/VP/TW	1.68576	Middle	0	1	0	0	0	0		0	0	0	TBA	0	0	0		0	0	0
Midline	32	islam	Primary(1-5 Class)	4	Others	2.6687	Richest	1	1	1	1	1	1	Doctor	1	0	1	PCSBA	0	1	0	Other	0	0	0
Midline	23	islam	No formal education	4	DL/R/VP/TW	1.74561	Middle	1	0	0	1	0	1		0	0	0	TTBA	0	0	0		0	0	0
Midline	35	islam	Primary(1-5 Class)	6	DL/R/VP/TW	0.798125	Poorest	0	0	0	0	0	0		0	0	0	TBA	0	0	0		0	0	0
Midline	17	islam	Primary(1-5 Class)	2	DL/R/VP/TW	2.3983	Richer	0	0	0	1	0	0	PCSBA	1	0	0	TTBA	0	0	0		0	0	0
Midline	29	islam	No formal education	2	Others	2.26963	Richer	0	0	0	0	0	0	Doctor	1	0	0	Others	0	0	0		0	0	0
Midline	26	islam	No formal education	5	Farming/Fishing/SL	1.25732	Poorer	1	0	1	0	0	1	PCSBA	1	0	0	PCSBA	0	1	0	PCSBA	1	0	0
Midline	31	islam	No formal education	6	Farming/Fishing/SL	1.67088	Middle	0	0	0	0	0	0	Other	0	0	0	TBA	0	0	0		0	0	0
Midline	25	islam	Primary(1-5 Class)	3	Business	1.67614	Middle	1	1	0	0	0	1	PCSBA	1	1	0	PCSBA	0	1	0	PCSBA	1	0	0
Midline	22	islam	Junior secondary(6-8 class)	1	Business	3.37701	Richest	1	0	0	0	0	0	Doctor	1	1	1	Doctor	1	1	1	Doctor	1	1	1
Midline	33	islam	Primary(1-5 Class)	4	Farming/Fishing/SL	1.19852	Poorer	0	0	0	0	0	0	PCSBA	1	0	1	Others	0	0	0		0	0	0
Midline	35	islam	No formal education	5	Business	2.3983	Richer	1	0	0	0	0	0		0	0	0	TBA	0	0	0	Drug Seller	1	1	1
Midline	22	islam	No formal education	3	Business	2.36192	Richer	1	1	0	0	0	1	PCSBA	1	0	0	TBA	0	0	0		0	0	0
Midline	28	islam	Secondary & higher(9+ Class)	3	Farming/Fishing/SL	2.50769	Richer	1	1	0	0	0	1	Doctor	1	0	1	Doctor	1	1	1	Doctor	1	1	1
Midline	17	islam	Secondary & higher(9+ Class)	1	Business	2.30501	Richer	1	1	0	0	0	1	Nurse	1	0	0	Others	1	0	0	Other	0	0	0
Midline	23	hindu	Primary(1-5 Class)	1	DL/R/VP/TW	2.01735	Middle	0	1	0	0	0	0	Doctor	1	0	1	TTBA	0	0	0		0	0	0
Midline	19	islam	No formal education	1	DL/R/VP/TW	2.46488	Richer	1	0	0	0	0	0		0	0	1	Others	0	0	1		0	0	1
Midline	37	islam	No formal education	6	Business	1.40852	Poorer	1	1	0	0	0	1	PCSBA	1	0	0	TBA	0	0	0		0	0	0
Midline	22	islam	Primary(1-5 Class)	2	Farming/Fishing/SL	2.30501	Richer	1	1	0	0	0	1	PCSBA	1	0	0	TBA	0	0	0	TBA/TTBA	0	0	0
Midline	27	islam	Secondary & higher(9+ Class)	2	Service/Overseas worker	2.57819	Richest	1	1	0	0	0	1	PCSBA	1	0	0	Nurse	0	1	0	Nurse	1	1	0
Midline	25	islam	Secondary & higher(9+ Class)	2	Business	3.38821	Richest	1	1	0	1	1	1	Doctor	1	1	0	Nurse	1	1	0	Nurse	1	1	0
Midline	18	islam	Primary(1-5 Class)	1	Business	2.55975	Richer	1	0	0	0	0	0	Doctor	1	1	1	TBA	0	0	0		0	0	1
Midline	25	islam	Primary(1-5 Class)	2	Farming/Fishing/SL	2.30501	Richer	1	0	0	0	0	0	Doctor	1	1	0	PCSBA	0	1	0	PCSBA	1	1	1
Midline	22	islam	Primary(1-5 Class)	1	Farming/Fishing/SL	1.16511	Poorer	1	0	1	0	0	1	Other	0	0	0	TTBA	0	0	0		0	0	0
Midline	20	islam	No formal education	1	DL/R/VP/TW	1.4387	Poorer	1	1	1	0	1	1	PCSBA	1	1	0	TTBA	0	0	0		0	0	0
Midline	19	islam	Primary(1-5 Class)	2	DL/R/VP/TW	0.485985	Poorest	1	1	0	1	1	1	Nurse	1	0	0	TTBA	0	0	0	Other	0	0	0
Midline	31	islam	Primary(1-5 Class)	3	DL/R/VP/TW	0.659757	Poorest	1	1	0	0	0	1	Other	0	0	0	Others	0	0	0		0	0	1
Midline	20	islam	Primary(1-5 Class)	1	DL/R/VP/TW	2.36192	Richer	1	1	1	1	1	1	Other	0	0	0	TTBA	0	0	0	Other	0	0	0
Midline	22	islam	Secondary & higher(9+ Class)	2	Service/Overseas worker	1.84932	Middle	1	1	0	1	1	1	PCSBA	1	0	0	TBA	0	0	0		0	0	1
Midline	26	islam	Primary(1-5 Class)	3	Service/Overseas worker	2.11408	Middle	1	0	0	1	0	1	PCSBA	1	0	1	Doctor	1	1	1	Doctor	1	1	0
Midline	24	islam	Junior secondary(6-8 class)	2	Farming/Fishing/SL	2.71684	Richest	0	1	1	0	0	1	PCSBA	1	0	0	TTBA	0	0	0		0	0	1
Midline	24	islam	Primary(1-5 Class)	4	Farming/Fishing/SL	2.18	Richer	1	0	0	0	0	0	PCSBA	1	0	0	TTBA	0	0	0		0	0	0
Midline	30	islam	No formal education	5	DL/R/VP/TW	1.19664	Poorer	1	0	0	0	0	0		0	0	0	TTBA	0	0	0		0	0	1
Midline	19	islam	Junior secondary(6-8 class)	2	Business	2.67007	Richest	1	0	0	0	0	0	Doctor	1	1	1	Others	0	0	0		0	0	0
Midline	30	islam	Primary(1-5 Class)	5	DL/R/VP/TW	2.2224	Richer	0	1	0	0	0	0	PCSBA	1	0	0	TBA	0	0	0		0	0	0
Midline	26	islam	Primary(1-5 Class)	3	Farming/Fishing/SL	1.62824	Middle	1	0	0	0	0	0		0	0	1	Others	0	0	0		0	0	0
Midline	19	islam	No formal education	1	Farming/Fishing/SL	2.3983	Richer	1	0	0	0	0	0		0	0	1	TBA	0	0	1		0	0	1
Midline	18	islam	Junior secondary(6-8 class)	1	DL/R/VP/TW	1.57654	Middle	1	1	0	1	1	1	PCSBA	1	0	1	TTBA	0	0	0		0	0	1
Midline	28	hindu	Junior secondary(6-8 class)	6	DL/R/VP/TW	0.757716	Poorest	1	1	0	0	0	1	Doctor	1	1	1	Nurse	1	1	1	Doctor	1	1	1
Midline	25	islam	Primary(1-5 Class)	2	Farming/Fishing/SL	2.79683	Richest	1	0	0	0	0	0	Doctor	1	0	0	TBA	0	0	0		0	0	0
Midline	26	hindu	Secondary & higher(9+ Class)	3	Service/Overseas worker	1.79003	Middle	1	1	1	0	1	1	Other	0	0	0	TTBA	0	0	0		0	0	0
Midline	23	islam	Primary(1-5 Class)	2	DL/R/VP/TW	2.54914	Richer	0	1	1	1	1	1		0	0	0	TBA	0	0	1	Doctor	1	1	0
Midline	18	islam	Primary(1-5 Class)	1	Others	2.46488	Richer	0	1	1	1	1	1	Doctor	1	0	0	TBA	0	0	0		0	0	0
Midline	18	islam	Primary(1-5 Class)	1	DL/R/VP/TW	2.35081	Richer	0	0	0	0	0	0	PCSBA	1	0	0	TBA	0	0	0		0	0	0
Midline	22	islam	Primary(1-5 Class)	4	DL/R/VP/TW	2.54914	Richer	0	0	0	0	0	0		0	0	0	TBA	0	0	0		0	0	0
Midline	18	islam	Primary(1-5 Class)	1	DL/R/VP/TW	2.35081	Richer	0	0	0	0	0	0		0	0	0	TTBA	0	0	0		0	0	0
Midline	30	islam	Junior secondary(6-8 class)	5	Business	3.14102	Richest	1	0	0	1	0	1	Doctor	1	1	0	PCSBA	0	1	0	PCSBA	1	1	0
Midline	24	islam	Primary(1-5 Class)	3	Farming/Fishing/SL	1.94261	Middle	1	0	0	1	0	1	Doctor	1	0	0	TTBA	0	0	0	PCSBA	1	0	0
Midline	25	islam	Primary(1-5 Class)	2	Farming/Fishing/SL	0.967861	Poorer	1	0	0	0	0	0		0	0	0	TTBA	0	0	0		0	0	0
Midline	27	islam	No formal education	5	DL/R/VP/TW	1.94261	Middle	0	0	0	0	0	0	PCSBA	1	0	0	TBA	0	0	0	Other	0	0	0
Midline	28	islam	Primary(1-5 Class)	6	Farming/Fishing/SL	2.56314	Richer	0	0	0	0	0	0	Doctor	1	0	1	Others	0	0	0	Other	0	0	0
Midline	32	islam	Primary(1-5 Class)	6	DL/R/VP/TW	0.372091	Poorest	1	1	0	0	0	1	Doctor	1	0	0	TBA	0	0	0	PCSBA	1	0	0
Midline	20	islam	Primary(1-5 Class)	1	DL/R/VP/TW	1.39012	Poorer	1	1	0	1	1	1	Other	0	0	0	Others	0	0	0		0	0	0
Midline	26	islam	No formal education	2	DL/R/VP/TW	0.493625	Poorest	1	0	0	0	0	0	Nurse	1	0	0	Others	0	0	0		0	0	0
Midline	25	islam	Primary(1-5 Class)	2	DL/R/VP/TW	1.90345	Middle	1	0	0	0	0	0	Doctor	1	0	1	PCSBA	0	1	0		0	0	0
Midline	28	islam	Primary(1-5 Class)	3	Business	1.51434	Poorer	0	0	0	0	0	0	Nurse	1	0	1	Others	0	0	0		0	0	0
Midline	28	islam	No formal education	4	Farming/Fishing/SL	1.4026	Poorer	0	0	0	0	0	0	PCSBA	1	0	0	TBA	0	0	1		0	0	0
Midline	18	islam	Primary(1-5 Class)	1	Service/Overseas worker	2.45521	Richer	1	0	0	0	0	0	Doctor	1	0	1	Nurse	1	1	1	Doctor	1	1	1
Midline	27	hindu	Primary(1-5 Class)	1	Business	1.40852	Poorer	0	1	0	0	0	0		0	0	0	TTBA	0	0	0		0	0	0
Midline	21	islam	Primary(1-5 Class)	2	Business	2.59663	Richest	1	1	1	0	1	1	Nurse	1	0	0	Others	0	0	0	Nurse	1	1	1
Midline	23	islam	No formal education	2	DL/R/VP/TW	1.84932	Middle	1	0	0	0	0	0	Doctor	1	1	0	TBA	0	0	0		0	0	0
Midline	33	hindu	Primary(1-5 Class)	4	DL/R/VP/TW	0.757716	Poorest	1	1	1	1	1	1	Other	0	0	1	TTBA	0	0	0		0	0	1
Midline	22	islam	Primary(1-5 Class)	2	DL/R/VP/TW	0.785643	Poorest	1	1	0	1	1	1	Doctor	1	0	1	TTBA	0	0	0		0	0	0
Midline	28	islam	Primary(1-5 Class)	6	DL/R/VP/TW	2.60403	Richest	1	0	0	1	0	1	Other	0	0	0	TBA	0	0	0		0	0	0
Midline	26	islam	Primary(1-5 Class)	4	Business	2.81012	Richest	1	0	0	1	0	1		0	0	0	TTBA	0	0	0		0	0	0
Midline	30	islam	No formal education	4	Service/Overseas worker	3.43564	Richest	1	0	0	1	0	1	PCSBA	1	0	0	TBA	0	0	0		0	0	0
Midline	16	islam	No formal education	1	Business	2.47043	Richer	1	0	0	0	0	0	Doctor	1	1	1	TTBA	0	0	0		0	0	0
Midline	20	islam	Primary(1-5 Class)	1	Farming/Fishing/SL	2.50769	Richer	1	0	0	0	0	0	Doctor	1	0	0	TTBA	0	0	0		0	0	0
Midline	23	islam	Primary(1-5 Class)	3	Business	2.59843	Richest	0	0	0	0	0	0	Doctor	1	0	0	TTBA	0	0	0		0	0	1
Midline	22	islam	Secondary & higher(9+ Class)	2	Business	2.0303	Middle	0	0	0	0	0	0	Doctor	1	0	1	TTBA	0	0	1	Drug Seller	0	0	0
Midline	29	islam	Primary(1-5 Class)	2	Service/Overseas worker	3.10309	Richest	1	0	0	1	0	1	CHCP	0	0	1	TBA	0	0	1		0	0	1
Midline	36	islam	No formal education	5	Others	1.63588	Middle	0	0	0	0	0	0	PCSBA	1	0	1	TBA	0	0	0		0	0	0
Midline	25	islam	Primary(1-5 Class)	2	DL/R/VP/TW	2.13421	Richer	1	0	0	0	0	0	Other	0	0	0	Others	0	0	0		0	0	0
Midline	24	islam	Primary(1-5 Class)	3	Farming/Fishing/SL	2.2844	Richer	1	0	0	0	0	0		0	0	0	TTBA	0	0	0		0	0	0
Midline	22	islam	Junior secondary(6-8 class)	1	Service/Overseas worker	2.72914	Richest	0	0	1	0	0	0	Doctor	1	0	0	Doctor	1	1	1	Doctor	1	1	0
Midline	32	islam	No formal education	7	Farming/Fishing/SL	0.485985	Poorest	1	0	0	0	0	0	Other	0	0	0	Others	0	0	1	Other	0	0	1
Midline	22	islam	Primary(1-5 Class)	2	Farming/Fishing/SL	2.30501	Richer	1	1	1	0	1	1	Nurse	1	0	0	TBA	0	0	1	Other	0	0	1
Midline	30	islam	No formal education	5	DL/R/VP/TW	0.916716	Poorest	1	0	0	0	0	0	Other	0	0	0	TBA	0	0	0		0	0	0
Midline	22	islam	Primary(1-5 Class)	2	Farming/Fishing/SL	2.35081	Richer	1	1	0	1	1	1		0	0	0	TBA	0	0	1		0	0	0
Midline	30	islam	No formal education	4	DL/R/VP/TW	0.920376	Poorest	1	0	0	0	0	0	Nurse	1	0	0	PCSBA	0	1	1	PCSBA	1	1	0
Midline	32	islam	No formal education	4	Business	2.59663	Richest	1	1	0	0	0	1		0	0	0	PCSBA	0	1	0	PCSBA	1	1	0
Midline	19	islam	No formal education	1	DL/R/VP/TW	1.94261	Middle	1	0	0	0	0	0	Doctor	1	0	0	TBA	0	0	0		0	0	0
Midline	21	islam	No formal education	3	DL/R/VP/TW	0.357319	Poorest	1	1	0	0	0	1	PCSBA	1	1	0	TTBA	0	0	0		0	0	1
Midline	26	islam	Primary(1-5 Class)	5	Business	1.97013	Middle	1	1	0	1	1	1	PCSBA	1	1	0	TTBA	0	0	0	PCSBA	1	0	1
Midline	15	islam	Primary(1-5 Class)	1	Business	2.60237	Richest	1	0	0	0	0	0	CHCP	0	0	0	TTBA	0	0	0		0	0	0
Midline	27	islam	Primary(1-5 Class)	3	DL/R/VP/TW	1.5018	Poorer	1	0	0	1	0	1	PCSBA	1	0	0	Nurse	1	1	1	Doctor	1	1	0
Midline	17	islam	Junior secondary(6-8 class)	1	Farming/Fishing/SL	1.11387	Poorer	1	0	0	0	0	0	Nurse	1	0	0	TBA	0	0	0		0	0	0
Midline	20	islam	No formal education	2	Service/Overseas worker	0.84912	Poorest	1	1	0	1	1	1	CHCP	0	0	0	TBA	0	0	1	Drug Seller	0	0	1
Midline	22	islam	Junior secondary(6-8 class)	2	Farming/Fishing/SL	1.98529	Middle	1	0	0	1	0	1		0	0	0	TBA	0	0	1		0	0	0
Midline	25	islam	Junior secondary(6-8 class)	2	Service/Overseas worker	2.90476	Richest	1	0	0	0	0	0	Doctor	1	0	1	TBA	0	0	0		0	0	0
Midline	30	islam	No formal education	6	Farming/Fishing/SL	1.04538	Poorer	1	0	0	0	0	0	PCSBA	1	0	0	TBA	0	0	0		0	0	0
Midline	23	islam	Primary(1-5 Class)	4	Farming/Fishing/SL	1.04538	Poorer	1	0	0	1	0	1	Doctor	1	0	0	TBA	0	0	0		0	0	0
Midline	24	hindu	Primary(1-5 Class)	2	Farming/Fishing/SL	2.3983	Richer	1	1	0	0	0	1	Nurse	1	1	1	PCSBA	0	1	0	PCSBA	1	1	0
Midline	30	hindu	Primary(1-5 Class)	4	Farming/Fishing/SL	1.04538	Poorer	1	0	0	0	0	0	PCSBA	1	0	0	Others	0	0	0		0	0	0
Midline	43	hindu	No formal education	8	Farming/Fishing/SL	0.438499	Poorest	1	0	0	0	0	0		0	0	1	Others	0	0	1	Drug Seller	0	0	1
Midline	20	hindu	No formal education	1	Farming/Fishing/SL	1.02757	Poorer	1	0	0	0	0	0	Doctor	1	0	0	TBA	0	0	0	Drug Seller	0	0	1
Midline	36	islam	Primary(1-5 Class)	9	DL/R/VP/TW	0.488279	Poorest	1	0	0	0	0	0	PCSBA	1	1	1	Others	0	0	0	PCSBA	1	0	0
Midline	21	islam	Primary(1-5 Class)	3	DL/R/VP/TW	0.414231	Poorest	1	0	0	0	0	0	Other	0	0	0	TTBA	0	0	0	Other	0	0	0
Midline	35	islam	No formal education	8	Business	1.94261	Middle	0	0	0	0	0	0	Doctor	1	0	1	TTBA	0	0	0		0	0	1
Midline	24	islam	No formal education	2	Others	2.12656	Richer	1	0	0	0	0	0	PCSBA	1	1	1	Nurse	0	1	0	Drug Seller	0	0	1
Midline	36	islam	Primary(1-5 Class)	3	Service/Overseas worker	2.35098	Richer	1	0	0	0	0	0	Doctor	1	0	1	TBA	0	0	1		0	0	1
Midline	26	islam	Primary(1-5 Class)	3	DL/R/VP/TW	1.67088	Middle	1	0	0	0	0	0	PCSBA	1	0	1	TTBA	0	0	0	TBA/TTBA	0	0	1
Midline	20	islam	No formal education	2	Farming/Fishing/SL	2.62121	Richest	1	0	0	0	0	0	Doctor	1	0	0	TTBA	0	0	1		0	0	1
Midline	35	islam	Secondary & higher(9+ Class)	5	Business	2.87278	Richest	1	0	0	0	0	0	Doctor	1	1	1	Nurse	0	1	1	Doctor	1	1	0
Midline	34	islam	Primary(1-5 Class)	7	Service/Overseas worker	2.18	Richer	1	0	0	0	0	0	PCSBA	1	0	0	TBA	0	0	0		0	0	0
Midline	31	islam	Primary(1-5 Class)	3	Service/Overseas worker	2.76722	Richest	0	1	0	0	0	0	Doctor	1	1	0	Doctor	1	1	0	Doctor	1	1	0
Midline	20	islam	Primary(1-5 Class)	2	Business	2.3983	Richer	1	1	0	0	0	1	Doctor	1	0	0	TBA	0	0	1	Drug Seller	0	0	0
Midline	22	islam	Primary(1-5 Class)	2	Business	2.3983	Richer	0	1	0	0	0	0	PCSBA	1	0	0	TBA	0	0	0	PCSBA	1	0	1
Midline	23	islam	Secondary & higher(9+ Class)	3	Service/Overseas worker	2.86341	Richest	1	0	0	1	0	1		0	0	0	TBA	0	0	1		0	0	0
Midline	25	islam	No formal education	3	DL/R/VP/TW	1.5018	Poorer	1	0	0	0	0	0		0	0	1	TTBA	0	0	0		0	0	0
Midline	29	islam	Secondary & higher(9+ Class)	2	Others	3.20486	Richest	1	1	1	1	1	1	Doctor	1	1	1	PCSBA	0	1	0	PCSBA	1	1	0
Midline	34	islam	No formal education	7	DL/R/VP/TW	1.94261	Middle	1	0	0	0	0	0		0	0	1	TBA	0	0	0		0	0	1
Midline	19	islam	Junior secondary(6-8 class)	1	Farming/Fishing/SL	3.24562	Richest	0	0	0	0	0	0	Other	0	0	0	TBA	0	0	0		0	0	0
Midline	20	islam	Junior secondary(6-8 class)	3	Farming/Fishing/SL	1.13867	Poorer	1	1	0	0	0	1	Drug Seller	0	0	1	TBA	0	0	0		0	0	0
Midline	25	hindu	Primary(1-5 Class)	2	Business	1.8642	Middle	0	1	0	0	0	0	Doctor	1	0	0	TBA	0	0	0	Drug Seller	0	0	1
Midline	24	hindu	Primary(1-5 Class)	2	Business	1.40852	Poorer	0	1	1	0	0	1	Doctor	1	0	1	TBA	0	0	0	Other	0	0	1
Midline	38	islam	No formal education	7	Farming/Fishing/SL	1.99952	Middle	1	1	0	0	0	1	Doctor	1	0	1	TBA	0	0	0	Drug Seller	0	0	1
Midline	23	islam	Primary(1-5 Class)	4	Farming/Fishing/SL	2.09207	Middle	1	0	0	0	0	0	PCSBA	1	0	0	TBA	0	0	0		0	0	0
Midline	18	islam	No formal education	2	DL/R/VP/TW	0.535765	Poorest	1	1	0	0	0	1		0	0	1	TBA	0	0	0		0	0	0
Midline	20	islam	Primary(1-5 Class)	1	Farming/Fishing/SL	2.5185	Richer	1	1	0	0	0	1	PCSBA	1	0	0	TBA	0	0	0		0	0	0
Midline	32	islam	Primary(1-5 Class)	3	Business	2.59663	Richest	1	0	0	0	0	0	Doctor	1	1	0	TTBA	0	0	0	PCSBA	1	1	0
Midline	28	islam	Junior secondary(6-8 class)	4	Farming/Fishing/SL	2.45521	Richer	1	0	0	0	0	0	Doctor	1	0	0	TTBA	0	0	0		0	0	0
Midline	46	islam	No formal education	9	Farming/Fishing/SL	1.95576	Middle	1	0	0	0	0	0	Doctor	1	0	0	Doctor	1	1	1	Doctor	1	1	0
Midline	23	islam	No formal education	3	DL/R/VP/TW	1.52905	Poorer	1	0	0	1	0	1	Doctor	1	1	0	TTBA	0	0	0		0	0	0
Midline	25	islam	Primary(1-5 Class)	3	Farming/Fishing/SL	1.15104	Poorer	0	0	0	0	0	0		0	0	0	TBA	0	0	0		0	0	0
Midline	30	islam	Primary(1-5 Class)	5	DL/R/VP/TW	1.23007	Poorer	1	0	0	0	0	0	Other	0	0	1	Others	0	0	0	Other	0	0	0
Midline	20	islam	Junior secondary(6-8 class)	2	Business	1.92406	Middle	0	0	0	0	0	0		0	0	0	Others	0	0	0		0	0	0
Midline	27	islam	Junior secondary(6-8 class)	3	Business	2.61179	Richest	1	0	0	0	0	0		0	0	0	Others	0	0	0		0	0	1
Midline	25	islam	Secondary & higher(9+ Class)	2	Farming/Fishing/SL	3.15174	Richest	1	1	0	0	0	1	Doctor	1	0	1	Doctor	1	1	0	Doctor	1	1	0
Midline	19	islam	Primary(1-5 Class)	1	Business	1.84932	Middle	1	1	0	0	0	1	Doctor	1	0	0	TBA	0	0	0	Doctor	1	0	1
Midline	39	islam	Primary(1-5 Class)	5	DL/R/VP/TW	2.24658	Richer	1	0	0	0	0	0	Doctor	1	1	0	PCSBA	0	1	0	PCSBA	1	1	0
Midline	19	islam	Primary(1-5 Class)	1	Farming/Fishing/SL	2.1561	Richer	1	1	1	0	1	1	Doctor	1	0	0	PCSBA	0	1	1		0	0	0
Midline	21	islam	Secondary & higher(9+ Class)	1	Service/Overseas worker	2.60237	Richest	1	0	0	1	0	1	Doctor	1	1	1	TTBA	0	0	0		0	0	1
Midline	26	islam	Primary(1-5 Class)	3	DL/R/VP/TW	0.757716	Poorest	1	0	0	0	0	0		0	0	0	TTBA	0	0	0		0	0	0
Midline	27	islam	Primary(1-5 Class)	3	DL/R/VP/TW	1.69674	Middle	1	0	0	1	0	1	Nurse	1	0	0	TTBA	0	0	0		0	0	0
Midline	22	islam	Secondary & higher(9+ Class)	2	Farming/Fishing/SL	2.50756	Richer	1	1	0	1	1	1	Doctor	1	1	1	TTBA	0	0	0		0	0	0
Midline	26	islam	No formal education	2	DL/R/VP/TW	1.95749	Middle	1	0	0	1	0	1	TBA/TTBA	0	0	0	TBA	0	0	1		0	0	0
Midline	25	islam	Secondary & higher(9+ Class)	2	Service/Overseas worker	2.61179	Richest	1	1	0	0	0	1	PCSBA	1	0	0	TTBA	0	0	0	CHCP	1	0	1
Midline	35	islam	Secondary & higher(9+ Class)	3	Service/Overseas worker	2.84918	Richest	1	1	0	1	1	1	Doctor	1	0	0	TTBA	0	0	0	Other	1	1	1
Midline	28	islam	Primary(1-5 Class)	6	Farming/Fishing/SL	2.81012	Richest	1	1	0	0	0	1	PCSBA	1	0	1	PCSBA	0	1	0		0	0	0
Midline	24	islam	No formal education	2	DL/R/VP/TW	0.542897	Poorest	0	1	0	1	0	1	Nurse	1	0	1	Others	0	0	0		0	0	1
Midline	20	islam	Primary(1-5 Class)	1	DL/R/VP/TW	0.62905	Poorest	1	0	0	0	0	0	PCSBA	1	0	0	TTBA	0	0	0		0	0	0
Midline	39	islam	No formal education	4	Farming/Fishing/SL	2.75901	Richest	0	1	0	1	0	1		0	0	0	TTBA	0	0	0		0	0	0
Midline	20	islam	No formal education	1	Farming/Fishing/SL	2.3983	Richer	1	1	0	0	0	1	Other	0	0	0	TTBA	0	0	0		0	0	0
Midline	21	islam	Junior secondary(6-8 class)	2	Farming/Fishing/SL	2.61179	Richest	0	0	0	0	0	0	Other	0	0	0	TBA	0	0	0		0	0	0
Midline	29	islam	Primary(1-5 Class)	4	Farming/Fishing/SL	1.10229	Poorer	1	0	0	0	0	0		0	0	0	TBA	0	0	0	Other	0	0	0
Midline	29	islam	Primary(1-5 Class)	2	Farming/Fishing/SL	2.3983	Richer	1	1	0	0	0	1	Doctor	1	0	1	TTBA	0	0	0	Other	0	0	0
Midline	26	islam	Primary(1-5 Class)	4	Farming/Fishing/SL	0.627722	Poorest	1	1	0	0	0	1	CHCP	0	0	0	TBA	0	0	0	Other	0	0	1
Midline	21	islam	Secondary & higher(9+ Class)	1	Service/Overseas worker	2.77663	Richest	1	1	0	1	1	1	Doctor	1	0	0	Nurse	1	1	0	Nurse	1	1	0
Midline	32	islam	No formal education	4	DL/R/VP/TW	2.0144	Middle	0	0	0	0	0	0	Doctor	1	0	0	TBA	0	0	0		0	0	0
Midline	27	islam	No formal education	3	Farming/Fishing/SL	1.85597	Middle	0	1	1	0	0	1	PCSBA	1	0	0	TTBA	0	0	0		0	0	0
Midline	25	islam	Primary(1-5 Class)	3	Farming/Fishing/SL	2.59663	Richest	0	1	0	0	0	0	PCSBA	1	0	0	Others	0	0	0	TBA/TTBA	0	0	1
Midline	33	islam	Junior secondary(6-8 class)	6	Farming/Fishing/SL	2.01735	Middle	1	0	0	0	0	0		0	0	0	Others	0	0	0		0	0	0
Midline	35	islam	Primary(1-5 Class)	6	DL/R/VP/TW	1.65421	Middle	1	1	0	0	0	1	PCSBA	1	0	0	TTBA	0	0	0		0	0	0
Midline	25	islam	No formal education	3	Business	2.65486	Richest	0	0	0	0	0	0		0	0	0	TBA	0	0	0		0	0	0
Midline	27	islam	Secondary & higher(9+ Class)	1	Others	1.68772	Middle	0	0	0	0	0	0	Doctor	1	1	1	Doctor	1	1	1	Doctor	1	1	1
Midline	22	islam	No formal education	3	DL/R/VP/TW	0.773651	Poorest	0	0	0	0	0	0	PCSBA	1	0	0	TTBA	0	0	0		0	0	0
Midline	30	islam	Junior secondary(6-8 class)	2	Business	2.84321	Richest	1	0	0	0	0	0		0	0	0	Others	0	0	0		0	0	0
Midline	21	islam	Primary(1-5 Class)	1	DL/R/VP/TW	1.56166	Poorer	1	0	0	0	0	0	Doctor	1	1	1	PCSBA	0	1	1	PCSBA	1	0	1
Midline	32	islam	No formal education	5	Farming/Fishing/SL	0.616945	Poorest	1	0	0	0	0	0	PCSBA	1	1	1	PCSBA	1	1	0		0	0	0
Midline	31	islam	Primary(1-5 Class)	3	Business	2.59663	Richest	1	1	0	0	0	1	PCSBA	1	0	0	TTBA	0	0	0		0	0	0
Midline	40	islam	No formal education	4	Others	0.58691	Poorest	1	0	0	0	0	0	PCSBA	1	0	0	PCSBA	0	1	1	PCSBA	1	0	0
Midline	30	islam	No formal education	4	Business	3.14578	Richest	1	0	0	0	0	0	Doctor	1	1	1	Nurse	1	1	1	PCSBA	1	0	1
Midline	28	islam	Junior secondary(6-8 class)	3	Business	2.65933	Richest	0	1	0	1	0	1	Other	0	0	0	TTBA	0	0	0	Drug Seller	0	0	0
Midline	19	islam	Primary(1-5 Class)	1	Business	2.49927	Richer	1	0	0	0	0	0	PCSBA	1	0	0	TBA	0	0	1		0	0	0
Midline	35	islam	Primary(1-5 Class)	7	Farming/Fishing/SL	2.67837	Richest	0	0	0	0	0	0	Doctor	1	0	1	TBA	0	0	0		0	0	0
Midline	19	islam	Junior secondary(6-8 class)	3	Farming/Fishing/SL	2.81012	Richest	1	0	0	1	0	1	Nurse	1	0	0	TBA	0	0	1	Nurse	1	0	0
Midline	23	islam	Primary(1-5 Class)	2	Business	2.22749	Richer	1	0	0	0	0	0		0	0	0	TBA	0	0	0	Drug Seller	0	0	1
Midline	25	islam	Primary(1-5 Class)	2	DL/R/VP/TW	1.65233	Middle	1	0	0	0	0	0		0	0	1	TBA	0	0	0		0	0	0
Midline	20	islam	Primary(1-5 Class)	3	Business	2.45521	Richer	1	0	0	0	0	0	CHCP	0	0	0	PCSBA	0	1	0		0	0	0
Midline	33	islam	No formal education	9	DL/R/VP/TW	1.81672	Middle	1	1	1	0	1	1	PCSBA	1	0	0	TTBA	0	0	0		0	0	0
Midline	18	islam	Primary(1-5 Class)	1	DL/R/VP/TW	0.801635	Poorest	0	0	0	1	0	0	Nurse	1	0	0	TBA	0	0	0		0	0	0
Midline	30	islam	Primary(1-5 Class)	4	Business	2.54914	Richer	0	0	1	0	0	0	Doctor	1	0	0	TBA	0	0	0		0	0	0
Midline	32	islam	Secondary & higher(9+ Class)	3	Service/Overseas worker	2.40772	Richer	1	1	1	0	1	1	Doctor	1	1	1	Doctor	1	1	1	Doctor	1	1	0
Midline	27	islam	No formal education	3	Business	2.37168	Richer	1	0	0	0	0	0	Other	0	0	0	TBA	0	0	0		0	0	0
Midline	25	islam	No formal education	4	DL/R/VP/TW	0.58503	Poorest	0	0	0	0	0	0		0	0	0	TBA	0	0	0		0	0	0
Midline	21	islam	Primary(1-5 Class)	2	DL/R/VP/TW	2.30501	Richer	1	0	0	0	0	0	PCSBA	1	0	0	TBA	0	0	0		0	0	0
Midline	28	islam	Primary(1-5 Class)	4	DL/R/VP/TW	2.45521	Richer	1	1	0	1	1	1	Doctor	1	0	1	TTBA	0	0	1		0	0	0
Midline	19	islam	Primary(1-5 Class)	1	Service/Overseas worker	2.6687	Richest	1	1	0	0	0	1		0	0	0	TTBA	0	0	0		0	0	0
Midline	22	islam	No formal education	3	DL/R/VP/TW	2.45521	Richer	1	1	1	0	1	1		0	0	1	TTBA	0	0	0		0	0	0
Midline	19	islam	Primary(1-5 Class)	1	DL/R/VP/TW	2.60237	Richest	1	0	0	1	0	1	PCSBA	1	1	0	TBA	0	0	0		0	0	0
Midline	20	islam	Primary(1-5 Class)	1	DL/R/VP/TW	2.0534	Middle	1	0	0	0	0	0	PCSBA	1	0	0	Others	0	0	0		0	0	0
Midline	16	islam	Junior secondary(6-8 class)	1	Business	2.62683	Richest	1	1	0	0	0	1	Doctor	1	1	0	Nurse	1	1	0	PCSBA	1	0	1
Midline	18	islam	Secondary & higher(9+ Class)	1	Service/Overseas worker	2.48848	Richer	1	0	0	0	0	0	PCSBA	1	1	0	PCSBA	0	1	1		0	0	1
Midline	35	islam	No formal education	7	Business	2.17768	Richer	1	0	0	0	0	0	PCSBA	1	0	0	TBA	0	0	0		0	0	0
Midline	21	islam	Secondary & higher(9+ Class)	1	Business	3.20486	Richest	1	0	0	0	0	0	Doctor	1	0	1	TBA	0	0	0		0	0	0
Midline	20	islam	Primary(1-5 Class)	1	Farming/Fishing/SL	2.58508	Richest	1	1	0	0	0	1	CHCP	1	0	0	TTBA	0	0	0	Drug Seller	1	0	1
Midline	33	islam	Primary(1-5 Class)	7	Farming/Fishing/SL	2.5185	Richer	0	0	0	0	0	0	PCSBA	1	0	1	TBA	0	0	0		0	0	0
Midline	35	islam	Primary(1-5 Class)	5	Farming/Fishing/SL	0.800696	Poorest	0	0	0	0	0	0		0	0	0	TTBA	0	0	0		0	0	0
Midline	27	islam	No formal education	4	DL/R/VP/TW	1.45432	Poorer	0	1	0	1	0	1	PCSBA	1	1	1	TTBA	1	0	1	PCSBA	1	0	0
Midline	25	islam	Primary(1-5 Class)	3	DL/R/VP/TW	0.800696	Poorest	0	1	0	0	0	0		0	0	1	TBA	0	0	1		0	0	0
Midline	31	islam	No formal education	5	DL/R/VP/TW	1.19852	Poorer	1	1	0	1	1	1		0	0	0	TTBA	0	0	0		0	0	0
Midline	26	islam	No formal education	3	DL/R/VP/TW	2.3983	Richer	1	0	0	0	0	0	CHCP	0	0	0	TBA	0	0	0		0	0	0
Midline	30	islam	No formal education	4	DL/R/VP/TW	0.438499	Poorest	1	0	0	0	0	0		0	0	1	TTBA	0	0	0		0	0	1
Midline	18	islam	Secondary & higher(9+ Class)	1	Business	2.89901	Richest	1	0	0	0	0	0	Doctor	1	0	1	Doctor	1	1	1	Doctor	1	1	1
Midline	20	islam	Junior secondary(6-8 class)	1	DL/R/VP/TW	1.62201	Middle	1	0	0	0	0	0	Other	0	0	0	TTBA	0	0	0		0	0	0
Midline	20	islam	Secondary & higher(9+ Class)	2	Service/Overseas worker	2.74112	Richest	1	1	0	0	0	1	Doctor	1	0	0	TTBA	0	0	0		0	0	0
Midline	19	islam	Junior secondary(6-8 class)	2	DL/R/VP/TW	1.11618	Poorer	1	0	0	0	0	0	Doctor	1	0	1	TTBA	0	0	0		0	0	0
Midline	33	islam	No formal education	4	DL/R/VP/TW	1.46837	Poorer	1	0	0	1	0	1	PCSBA	1	1	1	PCSBA	0	1	0	Other	0	0	1
Midline	19	islam	Secondary & higher(9+ Class)	1	Farming/Fishing/SL	1.57351	Poorer	1	1	1	1	1	1	Doctor	1	1	0	TBA	0	0	0		0	0	0
Midline	23	islam	No formal education	3	DL/R/VP/TW	1.74561	Middle	1	0	0	0	0	0	PCSBA	1	0	0	Others	0	0	0		0	0	0
Midline	24	islam	No formal education	2	Farming/Fishing/SL	1.28648	Poorer	1	1	0	0	0	1	PCSBA	1	0	1	TTBA	0	0	1		0	0	0
Midline	18	islam	Primary(1-5 Class)	1	DL/R/VP/TW	1.5018	Poorer	0	1	0	0	0	0	Doctor	1	0	1	Nurse	1	1	1	Nurse	1	1	0
Midline	25	islam	Secondary & higher(9+ Class)	1	Business	2.45521	Richer	1	1	0	0	0	1	Doctor	1	0	1	Doctor	1	1	0	Doctor	1	1	0
Midline	27	islam	Primary(1-5 Class)	4	Business	2.37159	Richer	0	0	0	0	0	0	PCSBA	1	0	1	Others	0	0	1		0	0	0
Midline	32	islam	No formal education	7	Business	0.866936	Poorest	0	0	0	0	0	0	PCSBA	1	0	0	TBA	0	0	1	Drug Seller	0	0	0
Midline	29	islam	Primary(1-5 Class)	3	Business	2.70355	Richest	1	1	0	0	0	1	PCSBA	1	0	1	TBA	0	0	0		0	0	0
Midline	30	islam	No formal education	3	DL/R/VP/TW	2.0144	Middle	1	0	0	0	0	0	PCSBA	1	0	1	TBA	0	0	0		0	0	1
Midline	26	islam	No formal education	3	DL/R/VP/TW	2.33828	Richer	1	1	0	0	0	1		0	0	1	TTBA	0	0	0	Drug Seller	0	0	1
Midline	42	islam	No formal education	7	Others	0.874576	Poorest	1	1	0	0	0	1	PCSBA	1	0	0	TBA	0	0	0		0	0	0
Midline	27	islam	No formal education	2	DL/R/VP/TW	1.57947	Middle	0	0	0	0	0	0	Other	0	0	0	TBA	0	0	1		0	0	0
Midline	21	islam	Primary(1-5 Class)	1	Service/Overseas worker	2.30501	Richer	0	0	0	0	0	0	PCSBA	1	0	1	TBA	0	0	0		0	0	0
Midline	32	islam	Primary(1-5 Class)	5	Farming/Fishing/SL	1.40867	Poorer	0	0	0	1	0	0	PCSBA	1	0	1	Others	0	0	1		0	0	0
Midline	32	islam	Primary(1-5 Class)	6	DL/R/VP/TW	1.23339	Poorer	0	0	0	0	0	0	PCSBA	1	0	0	TBA	0	0	0	Drug Seller	0	0	1
Midline	28	islam	Primary(1-5 Class)	5	Service/Overseas worker	0.357319	Poorest	0	0	0	0	0	0	PCSBA	1	0	1	TTBA	0	0	0		0	0	0
Midline	28	islam	Primary(1-5 Class)	4	DL/R/VP/TW	1.74561	Middle	0	1	0	0	0	0	Nurse	1	0	1	TTBA	0	0	0		0	0	0
Midline	20	islam	Primary(1-5 Class)	1	Business	2.35749	Richer	1	0	0	0	0	0	Doctor	1	0	1	Doctor	1	1	1	Doctor	1	1	0
Midline	25	islam	Junior secondary(6-8 class)	1	Service/Overseas worker	2.36192	Richer	1	1	1	0	1	1	Doctor	1	0	1	Doctor	1	1	1	Doctor	1	1	0
Midline	19	islam	No formal education	1	DL/R/VP/TW	1.05775	Poorer	1	0	1	0	0	1	Other	0	0	1	PCSBA	0	1	1		0	0	0
Midline	23	islam	Primary(1-5 Class)	3	Others	2.69623	Richest	0	0	0	0	0	0		0	0	0	Others	0	0	1		0	0	0
Midline	34	islam	Primary(1-5 Class)	5	Farming/Fishing/SL	1.98097	Middle	1	0	1	0	0	1	PCSBA	1	0	0	TTBA	0	0	0	Other	0	0	0
Midline	19	islam	Junior secondary(6-8 class)	1	Farming/Fishing/SL	3.00471	Richest	1	0	0	0	0	0	Nurse	1	0	0	TTBA	0	0	0		0	0	1
Midline	18	islam	Primary(1-5 Class)	1	DL/R/VP/TW	2.6687	Richest	1	1	1	0	1	1	Other	0	0	0	TTBA	0	0	0		0	0	1
Midline	33	islam	No formal education	8	Business	1.35448	Poorer	1	0	0	0	0	0	Doctor	1	1	1	Others	0	0	1	Other	0	0	0
Midline	24	islam	No formal education	2	Business	1.84932	Middle	0	1	0	0	0	0	PCSBA	1	0	0	TBA	0	0	0		0	0	0
Midline	28	islam	No formal education	4	Farming/Fishing/SL	2.30501	Richer	1	0	0	0	0	0	PCSBA	1	1	1	TBA	0	0	1		0	0	0
Midline	20	islam	Secondary & higher(9+ Class)	2	Farming/Fishing/SL	1.95749	Middle	1	0	0	0	0	0	PCSBA	1	0	1	PCSBA	0	1	0	PCSBA	1	1	1
Midline	26	islam	Primary(1-5 Class)	4	Business	2.03328	Middle	1	0	0	0	0	0		0	0	0	TBA	0	0	0		0	0	1
Midline	20	islam	Primary(1-5 Class)	1	DL/R/VP/TW	1.36103	Poorer	1	0	0	0	0	0	PCSBA	1	0	0	Nurse	1	1	1	Nurse	1	1	0
Midline	18	islam	No formal education	1	DL/R/VP/TW	1.36118	Poorer	1	1	0	0	0	1	Doctor	1	0	1	PCSBA	0	1	0	PCSBA	1	1	0
Midline	30	islam	No formal education	3	Service/Overseas worker	2.0534	Middle	0	0	0	1	0	0	PCSBA	1	0	1	TTBA	0	0	0		0	0	0
Midline	26	islam	No formal education	3	Business	2.06254	Middle	1	1	1	0	1	1	PCSBA	1	1	0	Nurse	1	1	1	Doctor	1	1	1
Midline	20	islam	Primary(1-5 Class)	2	DL/R/VP/TW	1.94261	Middle	0	0	0	0	0	0		0	0	0	TTBA	0	0	0		0	0	0
Midline	27	islam	Junior secondary(6-8 class)	3	Business	2.81012	Richest	0	1	0	0	0	0		0	0	0	TTBA	0	0	0		0	0	0
Midline	22	islam	Junior secondary(6-8 class)	2	Business	2.84321	Richest	1	1	1	0	1	1		0	0	0	TBA	0	0	0		0	0	0
Midline	35	islam	Secondary & higher(9+ Class)	6	DL/R/VP/TW	2.45521	Richer	0	0	0	0	0	0		0	0	0	TTBA	0	0	0		0	0	0
Midline	35	islam	Primary(1-5 Class)	4	Service/Overseas worker	2.67837	Richest	1	1	0	0	0	1	Doctor	1	0	1	TBA	0	0	0		0	0	0
Midline	35	islam	Primary(1-5 Class)	4	DL/R/VP/TW	1.8642	Middle	1	1	0	0	0	1	PCSBA	1	0	0	TBA	0	0	0		0	0	0
Midline	25	islam	Primary(1-5 Class)	2	Business	2.73992	Richest	1	0	0	0	0	0		0	0	0	TBA	0	0	0		0	0	0
Midline	34	islam	No formal education	7	DL/R/VP/TW	0.972837	Poorer	0	0	0	0	0	0		0	0	0	TBA	0	0	0		0	0	0
Midline	37	islam	Junior secondary(6-8 class)	3	Service/Overseas worker	2.73992	Richest	1	1	0	0	0	1	Doctor	1	0	0	Doctor	1	1	0	Doctor	1	1	1
Midline	21	islam	No formal education	3	Farming/Fishing/SL	1.74561	Middle	0	0	0	0	0	0	Doctor	1	0	1	TBA	0	0	0	Drug Seller	0	0	1
Midline	19	islam	Secondary & higher(9+ Class)	1	DL/R/VP/TW	2.60582	Richest	1	0	0	0	0	0		0	0	0	Doctor	1	1	1	Doctor	1	1	1
Midline	25	islam	Primary(1-5 Class)	2	DL/R/VP/TW	1.54017	Poorer	1	0	0	0	0	0	PCSBA	1	1	0	Others	0	0	0		0	0	0
Midline	26	islam	Junior secondary(6-8 class)	2	Business	3.36683	Richest	1	0	0	0	0	0	Doctor	1	1	0	Nurse	1	1	0		0	0	0
Midline	20	islam	Primary(1-5 Class)	1	DL/R/VP/TW	2.22749	Richer	1	0	0	0	0	0	Other	0	0	1	Others	0	0	1		0	0	0
Midline	31	islam	Primary(1-5 Class)	5	Farming/Fishing/SL	1.51417	Poorer	1	1	0	0	0	1	Nurse	1	0	1	Others	0	0	0		0	0	0
Midline	25	islam	No formal education	3	Business	2.35081	Richer	1	1	0	1	1	1	CHCP	1	0	1	TBA	0	0	0		0	0	0
Midline	30	islam	Junior secondary(6-8 class)	2	Business	3.06705	Richest	1	0	0	0	0	0	Doctor	1	0	1	TBA	0	0	0	PCSBA	1	0	1
Midline	22	islam	Primary(1-5 Class)	2	Business	1.55871	Poorer	1	0	0	0	0	0		0	0	0	TBA	0	0	0		0	0	0
Midline	19	islam	Junior secondary(6-8 class)	1	Farming/Fishing/SL	1.8642	Middle	1	1	0	0	0	1		0	0	0	TBA	0	0	0		0	0	0
Midline	24	islam	Secondary & higher(9+ Class)	2	Farming/Fishing/SL	2.82592	Richest	1	0	0	0	0	0	PCSBA	1	0	0	PCSBA	0	1	0		0	0	0
Midline	28	islam	Primary(1-5 Class)	2	Others	2.68334	Richest	1	0	0	0	0	0	Doctor	1	0	1	Others	0	0	1	Doctor	1	0	0
Midline	32	islam	No formal education	5	Farming/Fishing/SL	2.3983	Richer	1	0	0	0	0	0		0	0	0	TBA	0	0	0		0	0	0
Midline	26	hindu	No formal education	5	DL/R/VP/TW	1.13867	Poorer	1	1	0	0	0	1	Doctor	1	0	1	TTBA	0	0	1		0	0	0
Midline	39	islam	No formal education	11	DL/R/VP/TW	0.535765	Poorest	1	0	0	0	0	0		0	0	0	TTBA	0	0	0		0	0	0
Midline	28	islam	Junior secondary(6-8 class)	4	Others	2.61179	Richest	1	0	0	0	0	0		0	0	1	TBA	0	0	0		0	0	0
Midline	28	islam	Primary(1-5 Class)	5	DL/R/VP/TW	1.12085	Poorer	1	0	0	0	0	0		0	0	0	TBA	0	0	0	Drug Seller	0	0	0
Midline	22	islam	No formal education	2	DL/R/VP/TW	1.92406	Middle	1	0	0	0	0	0		0	0	0	TTBA	0	0	0		0	0	0
Midline	18	islam	Primary(1-5 Class)	2	Farming/Fishing/SL	2.22749	Richer	0	0	0	0	0	0		0	0	1	TTBA	0	0	0		0	0	0
Midline	25	islam	Primary(1-5 Class)	5	Farming/Fishing/SL	1.67088	Middle	0	0	0	0	0	0	Drug Seller	0	0	0	TBA	0	0	0		0	0	0
Midline	17	islam	No formal education	1	DL/R/VP/TW	1.56166	Poorer	1	0	0	0	0	0	Other	0	0	0	Nurse	1	1	0	Doctor	1	1	0
Midline	31	islam	No formal education	6	DL/R/VP/TW	1.33971	Poorer	1	0	0	0	0	0	PCSBA	1	0	1	TBA	0	0	0		0	0	0
Midline	26	islam	Secondary & higher(9+ Class)	2	Service/Overseas worker	2.79897	Richest	1	0	0	0	0	0	Doctor	1	1	1	Doctor	1	1	0	Doctor	1	1	0
Midline	20	islam	No formal education	2	DL/R/VP/TW	0.967861	Poorer	0	0	0	0	0	0		0	0	0	TBA	0	0	0		0	0	0
Midline	24	hindu	Primary(1-5 Class)	2	Farming/Fishing/SL	1.95749	Middle	1	0	0	0	0	0		0	0	0	TBA	0	0	0		0	0	0
Midline	28	islam	Junior secondary(6-8 class)	5	Service/Overseas worker	2.3983	Richer	1	0	0	0	0	0		0	0	0	TBA	0	0	0		0	0	1
Midline	18	islam	No formal education	2	DL/R/VP/TW	1.92406	Middle	1	0	0	0	0	0	Doctor	1	0	1	TBA	0	0	0	Doctor	1	0	1
Midline	33	islam	No formal education	8	Farming/Fishing/SL	1.19852	Poorer	0	1	0	0	0	0	Doctor	1	0	1	TBA	0	0	1		0	0	0
Midline	30	islam	No formal education	5	DL/R/VP/TW	0.926791	Poorer	1	1	0	0	0	1		0	0	1	PCSBA	0	1	0	PCSBA	1	1	1
Midline	28	islam	No formal education	4	DL/R/VP/TW	1.43012	Poorer	1	0	0	0	0	0	PCSBA	1	0	1	PCSBA	0	1	0	PCSBA	1	0	0
Midline	19	islam	Junior secondary(6-8 class)	1	Farming/Fishing/SL	2.73992	Richest	1	0	0	0	0	0		0	0	0	TBA	0	0	0		0	0	0
Midline	19	islam	Primary(1-5 Class)	1	DL/R/VP/TW	2.40329	Richer	1	0	0	0	0	0	PCSBA	1	0	0	PCSBA	0	1	0	PCSBA	1	1	1
Midline	24	islam	Primary(1-5 Class)	3	DL/R/VP/TW	0.357319	Poorest	1	0	0	0	0	0	CHCP	0	0	1	TBA	0	0	0		0	0	1
Midline	28	islam	Junior secondary(6-8 class)	5	Farming/Fishing/SL	2.3983	Richer	1	1	0	1	1	1	Doctor	1	1	1	PCSBA	0	1	1	PCSBA	1	1	0
Midline	24	islam	Primary(1-5 Class)	3	Business	2.22749	Richer	1	0	0	0	0	0	Drug Seller	0	0	0	TTBA	0	0	0		0	0	0
Midline	19	islam	Junior secondary(6-8 class)	1	Farming/Fishing/SL	2.3983	Richer	1	0	0	0	0	0		0	0	1	TTBA	0	0	0	Drug Seller	0	0	0
Midline	22	islam	Primary(1-5 Class)	2	Business	2.90476	Richest	1	1	0	0	0	1	Doctor	1	1	0	Others	0	0	0		0	0	0
Midline	24	islam	Primary(1-5 Class)	2	DL/R/VP/TW	1.84654	Middle	0	0	0	0	0	0	Drug Seller	0	0	0	TTBA	0	0	0		0	0	0
Midline	22	islam	Junior secondary(6-8 class)	2	Farming/Fishing/SL	1.40867	Poorer	1	0	0	0	0	0	Doctor	1	0	0	TTBA	0	0	0		0	0	0
Midline	25	islam	Primary(1-5 Class)	2	Business	2.3983	Richer	1	0	0	0	0	0	PCSBA	1	0	0	Others	0	0	0		0	0	0
Midline	24	islam	No formal education	1	Service/Overseas worker	1.54449	Poorer	1	0	0	0	0	0	Doctor	1	0	1	TBA	0	0	1	Nurse	1	0	0
Midline	24	islam	Secondary & higher(9+ Class)	3	Service/Overseas worker	2.85873	Richest	1	0	0	1	0	1	Other	0	0	1	TBA	0	0	1		0	0	1
Midline	22	islam	Secondary & higher(9+ Class)	1	Service/Overseas worker	3.57325	Richest	1	0	0	1	0	1	Doctor	1	0	0	TBA	0	0	1		0	0	0
Midline	15	islam	Secondary & higher(9+ Class)	1	Business	2.3983	Richer	1	0	0	0	0	0		0	0	0	TBA	0	0	0		0	0	0
Midline	19	islam	No formal education	2	DL/R/VP/TW	0.458244	Poorest	1	0	0	0	0	0	PCSBA	1	0	0	TBA	0	0	0		0	0	0
Midline	17	islam	Primary(1-5 Class)	1	DL/R/VP/TW	0.58691	Poorest	1	1	0	0	0	1		0	0	0	TTBA	0	0	0		0	0	1
Midline	36	islam	Primary(1-5 Class)	4	Business	0.971207	Poorer	1	1	0	1	1	1	Nurse	1	0	1	TTBA	0	0	1		0	0	1
Midline	24	islam	Primary(1-5 Class)	4	DL/R/VP/TW	1.04538	Poorer	0	1	0	0	0	0	PCSBA	1	0	1	TBA	0	0	0		0	0	0
Midline	19	islam	Primary(1-5 Class)	2	DL/R/VP/TW	2.61179	Richest	1	1	0	0	0	1	Doctor	1	1	0	PCSBA	0	1	0	PCSBA	1	1	0
Midline	27	islam	Primary(1-5 Class)	4	DL/R/VP/TW	0.69613	Poorest	1	1	0	0	0	1	Doctor	1	1	1	TTBA	0	0	1	Drug Seller	1	1	1
Midline	27	islam	Secondary & higher(9+ Class)	2	Business	2.01735	Middle	1	1	0	0	0	1	Doctor	1	0	0	Doctor	1	1	0	Doctor	1	1	0
Midline	21	islam	Junior secondary(6-8 class)	1	Farming/Fishing/SL	2.3983	Richer	1	1	1	0	1	1	PCSBA	1	0	0	TTBA	0	0	0		0	0	0
Midline	21	hindu	No formal education	2	DL/R/VP/TW	1.5018	Poorer	1	0	0	0	0	0	Nurse	1	0	0	TBA	0	0	0		0	0	1
Midline	18	islam	Junior secondary(6-8 class)	1	DL/R/VP/TW	1.77781	Middle	1	0	0	0	0	0	PCSBA	1	0	1	TBA	0	0	0		0	0	0
Midline	24	islam	Secondary & higher(9+ Class)	2	Service/Overseas worker	3.38326	Richest	1	1	0	0	0	1	Doctor	1	1	0	TBA	0	0	0		0	0	1
Midline	26	islam	Primary(1-5 Class)	5	Business	2.46488	Richer	1	1	0	1	1	1	Doctor	1	0	1	TBA	0	0	0		0	0	1
Midline	30	hindu	Primary(1-5 Class)	3	Farming/Fishing/SL	1.12085	Poorer	0	1	0	0	0	0		0	0	0	TTBA	0	0	0		0	0	0
Midline	31	islam	Primary(1-5 Class)	7	Farming/Fishing/SL	2.30501	Richer	1	0	0	1	0	1	Doctor	1	1	1	TTBA	0	0	0	Doctor	1	0	1
Midline	20	islam	Primary(1-5 Class)	1	Farming/Fishing/SL	1.67088	Middle	1	0	0	0	0	0	Doctor	1	0	1	TBA	0	0	0		0	0	0
Midline	30	islam	No formal education	5	Farming/Fishing/SL	2.30501	Richer	1	1	0	0	0	1	Doctor	1	0	1	TTBA	0	0	0		0	0	1
Midline	29	islam	Junior secondary(6-8 class)	4	Farming/Fishing/SL	2.30501	Richer	1	1	0	1	1	1	Doctor	1	0	1	TTBA	0	0	0	Doctor	1	0	0
Midline	40	islam	No formal education	6	Business	1.84932	Middle	0	1	0	0	0	0		0	0	0	TBA	0	0	0		0	0	1
Midline	30	islam	Primary(1-5 Class)	5	Farming/Fishing/SL	0.967861	Poorer	1	0	0	1	0	1	PCSBA	1	0	0	TTBA	0	0	0		0	0	0
Midline	34	islam	Junior secondary(6-8 class)	4	Service/Overseas worker	2.73992	Richest	1	0	0	1	0	1	Doctor	1	1	1	Doctor	1	1	0	Doctor	1	1	1
Midline	29	islam	Primary(1-5 Class)	5	DL/R/VP/TW	1.65421	Middle	0	0	0	0	0	0	CHCP	0	0	0	TBA	0	0	0		0	0	0
Midline	19	islam	Primary(1-5 Class)	1	Farming/Fishing/SL	2.11772	Middle	0	0	0	0	0	0	CHCP	1	0	1	Nurse	1	1	1		0	0	1
Midline	21	islam	Primary(1-5 Class)	2	Service/Overseas worker	2.60237	Richest	0	0	0	0	0	0	PCSBA	1	0	0	Nurse	1	1	1		0	0	0
Midline	23	islam	Junior secondary(6-8 class)	2	Business	2.8767	Richest	1	0	0	0	0	0	PCSBA	1	1	1	Nurse	1	1	0		0	0	0
Midline	30	islam	Primary(1-5 Class)	4	Service/Overseas worker	2.82362	Richest	0	0	0	0	0	0	CHCP	0	0	0	TBA	0	0	0		0	0	0
Midline	28	islam	Primary(1-5 Class)	4	Service/Overseas worker	2.3983	Richer	1	0	0	0	0	0	Doctor	1	0	1	TBA	0	0	0		0	0	1
Midline	24	islam	No formal education	4	Service/Overseas worker	2.14094	Richer	0	0	0	0	0	0	Doctor	1	0	1	Others	0	0	0		0	0	0
Midline	20	islam	Junior secondary(6-8 class)	1	Business	2.70995	Richest	0	0	1	0	0	0	Doctor	1	1	1	Doctor	1	1	0	Doctor	1	1	0
Midline	25	islam	Secondary & higher(9+ Class)	2	Business	2.09695	Middle	1	0	0	0	0	0	Drug Seller	0	0	0	Others	0	0	0		0	0	0
Midline	20	islam	Primary(1-5 Class)	1	DL/R/VP/TW	2.35081	Richer	0	1	0	0	0	0	Doctor	1	0	0	TBA	0	0	0		0	0	0
Midline	17	islam	No formal education	1	Service/Overseas worker	0.58691	Poorest	1	0	0	0	0	0	PCSBA	1	1	0	TTBA	0	0	0		0	0	0
Midline	25	islam	No formal education	2	Business	1.10524	Poorer	1	0	0	0	0	0	PCSBA	1	0	0	TTBA	0	0	0		0	0	0
Midline	30	islam	No formal education	5	Farming/Fishing/SL	1.13867	Poorer	1	1	0	0	0	1	PCSBA	1	0	0	TBA	0	0	0		0	0	0
Midline	19	islam	Primary(1-5 Class)	1	Farming/Fishing/SL	2.30501	Richer	1	0	0	0	0	0	Doctor	1	0	1	TBA	0	0	0		0	0	0
Midline	25	islam	Primary(1-5 Class)	3	Business	2.45521	Richer	1	1	0	0	0	1	Other	0	0	0	TBA	0	0	0		0	0	0
Midline	33	islam	No formal education	6	Business	2.3983	Richer	1	0	0	0	0	0	PCSBA	1	0	0	TBA	0	0	0		0	0	0
Midline	30	hindu	No formal education	3	Farming/Fishing/SL	2.03516	Middle	0	1	0	1	0	1	Doctor	1	1	1	TBA	0	0	0		0	0	0
Midline	19	islam	No formal education	1	DL/R/VP/TW	1.35748	Poorer	0	0	0	1	0	0	Nurse	1	0	1	TBA	0	0	0		0	0	0
Midline	26	islam	Primary(1-5 Class)	3	DL/R/VP/TW	1.57654	Middle	1	1	0	0	0	1	Other	0	0	0	TBA	0	0	0		0	0	1
Midline	29	islam	Primary(1-5 Class)	6	DL/R/VP/TW	2.3983	Richer	1	1	0	0	0	1	Nurse	1	0	0	Nurse	0	1	0		0	0	0
Midline	26	islam	No formal education	3	DL/R/VP/TW	1.13867	Poorer	0	0	0	0	0	0		0	0	0	TBA	0	0	0		0	0	0
Midline	21	islam	Primary(1-5 Class)	2	Farming/Fishing/SL	1.04538	Poorer	0	0	0	0	0	0		0	0	0	TBA	0	0	0		0	0	0
Midline	19	islam	Secondary & higher(9+ Class)	1	DL/R/VP/TW	2.3983	Richer	1	0	0	0	0	0	Other	0	0	0	TTBA	0	0	0		0	0	0
Midline	36	islam	Primary(1-5 Class)	4	Service/Overseas worker	1.19852	Poorer	0	0	0	0	0	0	Doctor	1	0	1	TBA	0	0	0		0	0	0
Midline	50	islam	No formal education	8	DL/R/VP/TW	0.967861	Poorer	1	0	0	0	0	0	CHCP	0	0	0	TBA	0	0	0		0	0	0
Midline	20	islam	No formal education	1	Service/Overseas worker	1.57947	Middle	0	0	0	0	0	0	Doctor	1	0	0	TBA	0	0	0		0	0	0
Midline	23	islam	Primary(1-5 Class)	2	Farming/Fishing/SL	2.18219	Richer	1	0	1	0	0	1	PCSBA	1	1	0	TTBA	0	0	0		0	0	0
Midline	28	islam	No formal education	4	Business	2.35081	Richer	0	0	0	0	0	0	CHCP	0	0	0	Nurse	1	1	1	Doctor	1	1	0
Midline	20	islam	Secondary & higher(9+ Class)	1	Service/Overseas worker	2.59663	Richest	0	0	0	0	0	0	Doctor	1	0	0	Nurse	1	1	0	Doctor	1	1	0
Midline	23	islam	No formal education	3	DL/R/VP/TW	1.96986	Middle	1	0	1	1	1	1	CHCP	0	0	0	Nurse	1	1	1		0	0	0
Midline	28	islam	Junior secondary(6-8 class)	1	Business	3.39669	Richest	1	0	0	0	0	0	Doctor	1	0	0	Doctor	1	1	0	Nurse	1	1	0
Midline	30	islam	Junior secondary(6-8 class)	2	Business	3.10086	Richest	1	0	0	0	0	0	Doctor	1	1	1	Doctor	1	1	1	Nurse	1	1	0
Midline	35	islam	Primary(1-5 Class)	6	Farming/Fishing/SL	0.757716	Poorest	1	0	0	0	0	0	PCSBA	1	1	1	Nurse	1	1	1		0	0	0
Midline	25	hindu	No formal education	4	DL/R/VP/TW	3.0142	Richest	1	0	1	0	0	1	Doctor	1	0	1	TBA	0	0	0		0	0	1
Midline	25	islam	Primary(1-5 Class)	3	Farming/Fishing/SL	2.65354	Richest	1	0	0	0	0	0	PCSBA	1	0	1	PCSBA	0	1	0	PCSBA	1	0	1
Midline	28	islam	Primary(1-5 Class)	4	Farming/Fishing/SL	2.60403	Richest	1	0	0	1	0	1	Other	0	0	0	TBA	0	0	0		0	0	0
Midline	28	islam	Junior secondary(6-8 class)	3	Business	3.00483	Richest	1	0	0	0	0	0	Doctor	1	0	0	TBA	0	0	0		0	0	0
Midline	28	islam	Secondary & higher(9+ Class)	4	Farming/Fishing/SL	2.14669	Richer	1	0	0	1	0	1	CHCP	1	0	0	TBA	0	0	0		0	0	0
Midline	19	islam	Primary(1-5 Class)	1	Farming/Fishing/SL	2.8065	Richest	1	0	0	0	0	0		0	0	1	TBA	0	0	1		0	0	1
Midline	21	islam	Secondary & higher(9+ Class)	1	Farming/Fishing/SL	2.3983	Richer	1	0	0	1	0	1		0	0	0	PCSBA	0	1	1		0	0	0
Midline	25	islam	Junior secondary(6-8 class)	3	DL/R/VP/TW	1.91	Middle	1	0	0	1	0	1	PCSBA	1	0	0	TBA	0	0	0		0	0	1
Midline	24	islam	Junior secondary(6-8 class)	3	DL/R/VP/TW	2.61179	Richest	1	0	0	0	0	0	PCSBA	1	0	0	TBA	0	0	0		0	0	1
Midline	20	islam	Primary(1-5 Class)	2	Farming/Fishing/SL	2.09019	Middle	0	0	0	0	0	0	Other	0	0	0	TTBA	0	0	0		0	0	0
Midline	22	islam	Primary(1-5 Class)	2	DL/R/VP/TW	2.88628	Richest	0	0	0	0	0	0		0	0	0	TTBA	0	0	0		0	0	0
Midline	26	islam	Primary(1-5 Class)	2	Others	2.31153	Richer	1	0	0	0	0	0		0	0	0	TBA	0	0	0		0	0	0
Midline	25	islam	Primary(1-5 Class)	4	DL/R/VP/TW	2.65486	Richest	1	0	0	0	0	0	Doctor	1	0	1	TBA	0	0	1		0	0	0
Midline	25	islam	Secondary & higher(9+ Class)	2	Business	2.09695	Middle	1	0	0	0	0	0	Drug Seller	0	0	0	Others	0	0	0		0	0	0
Midline	25	islam	Primary(1-5 Class)	2	Farming/Fishing/SL	1.11387	Poorer	0	0	0	0	0	0	CHCP	0	0	1	TBA	0	0	1	Drug Seller	0	0	0
Midline	23	islam	Secondary & higher(9+ Class)	2	Service/Overseas worker	3.20879	Richest	1	0	0	0	0	0	Doctor	1	1	0	Doctor	0	1	0	Doctor	1	1	0
Midline	20	islam	Primary(1-5 Class)	2	Farming/Fishing/SL	3.17466	Richest	1	1	0	0	0	1		0	0	0	TBA	0	0	0		0	0	1
Midline	26	islam	Primary(1-5 Class)	4	DL/R/VP/TW	2.3983	Richer	0	0	0	0	0	0		0	0	1	TBA	0	0	0		0	0	0
Midline	26	islam	Primary(1-5 Class)	3	DL/R/VP/TW	2.76263	Richest	0	0	0	0	0	0	CHCP	0	0	0	TBA	0	0	0		0	0	0
Midline	24	islam	No formal education	2	DL/R/VP/TW	2.22142	Richer	1	0	0	0	0	0		0	0	0	TBA	0	0	0		0	0	0
Midline	23	islam	No formal education	4	DL/R/VP/TW	1.09118	Poorer	0	1	0	0	0	0	Doctor	1	1	0	Nurse	1	1	1	Doctor	1	1	0
Midline	24	islam	Primary(1-5 Class)	2	DL/R/VP/TW	2.45521	Richer	1	1	0	0	0	1	Doctor	1	0	1	PCSBA	0	1	1		0	0	1
Midline	25	islam	Primary(1-5 Class)	2	DL/R/VP/TW	2.45521	Richer	0	0	0	1	0	0	Doctor	1	0	0	TBA	0	0	1	Drug Seller	0	0	1
Midline	23	islam	Primary(1-5 Class)	2	Farming/Fishing/SL	2.86703	Richest	1	0	0	0	0	0	Doctor	1	0	0	PCSBA	0	1	0		0	0	1
Midline	25	hindu	Primary(1-5 Class)	1	Farming/Fishing/SL	2.01735	Middle	1	0	1	0	0	1	Doctor	1	0	1	Others	0	0	0		0	0	0
Midline	25	hindu	Junior secondary(6-8 class)	2	Business	2.3983	Richer	1	0	0	0	0	0	Doctor	1	1	1	Others	0	0	0		0	0	0
Midline	25	islam	Primary(1-5 Class)	3	Farming/Fishing/SL	2.55489	Richer	1	0	0	0	0	0	Doctor	1	0	1	Doctor	1	1	0	Doctor	1	1	0
Midline	18	islam	Junior secondary(6-8 class)	1	Service/Overseas worker	1.8869	Middle	1	0	0	0	0	0		0	0	0	TBA	0	0	0		0	0	0
Midline	33	islam	Junior secondary(6-8 class)	4	Service/Overseas worker	2.65929	Richest	1	0	0	1	0	1		0	0	1	TBA	0	0	1		0	0	0
Midline	32	islam	Secondary & higher(9+ Class)	3	Service/Overseas worker	1.48619	Poorer	1	1	0	0	0	1	Doctor	1	1	0	TBA	0	0	0		0	0	0
Midline	21	islam	No formal education	2	DL/R/VP/TW	1.84932	Middle	0	0	0	0	0	0	PCSBA	1	1	1	TBA	0	0	1		0	0	1
Midline	23	islam	No formal education	2	DL/R/VP/TW	1.13867	Poorer	1	0	0	0	0	0	PCSBA	1	0	1	TBA	0	0	0		0	0	0
Midline	21	islam	Secondary & higher(9+ Class)	1	Business	3.48493	Richest	1	0	0	1	0	1	Doctor	1	1	1	Doctor	1	1	0	Doctor	1	1	0
Midline	21	islam	Secondary & higher(9+ Class)	1	Business	2.49776	Richer	0	0	1	0	0	0	Doctor	1	0	1	PCSBA	0	1	0	Drug Seller	0	0	0
Midline	32	islam	Primary(1-5 Class)	4	Farming/Fishing/SL	1.13087	Poorer	0	0	0	0	0	0	Doctor	1	0	0	TTBA	0	0	1		0	0	0
Midline	31	islam	No formal education	5	Farming/Fishing/SL	2.30501	Richer	1	0	0	0	0	0	Other	0	0	1	TBA	0	0	0	Doctor	1	0	1
Midline	20	islam	No formal education	1	Farming/Fishing/SL	0.664431	Poorest	1	0	0	0	0	0		0	0	0	TBA	0	0	0		0	0	0
Midline	34	islam	Secondary & higher(9+ Class)	5	Service/Overseas worker	2.45521	Richer	1	0	1	1	1	1	Doctor	1	1	1	Doctor	1	1	1	Doctor	1	1	0
Midline	26	islam	Primary(1-5 Class)	2	Service/Overseas worker	2.95724	Richest	0	0	0	0	0	0	Doctor	1	0	0	TBA	0	0	0		0	0	0
Midline	25	islam	No formal education	4	DL/R/VP/TW	1.54687	Poorer	0	0	0	0	0	0		0	0	0	Nurse	1	1	1	Nurse	1	1	0
Midline	31	hindu	Secondary & higher(9+ Class)	1	Business	3.2691	Richest	0	0	0	0	0	0	Doctor	1	1	1	Doctor	1	1	1	Doctor	1	1	0
Midline	28	islam	No formal education	4	Farming/Fishing/SL	0.757716	Poorest	1	0	0	0	0	0	CHCP	0	0	1	TBA	0	0	0		0	0	1
Midline	28	islam	Primary(1-5 Class)	4	Business	1.84654	Middle	1	1	0	0	0	1	Doctor	1	0	0	TTBA	0	0	0		0	0	0
Midline	33	islam	Primary(1-5 Class)	4	Others	2.90476	Richest	0	0	0	0	0	0	Nurse	1	0	0	Nurse	1	1	0	Doctor	1	1	0
Midline	21	islam	Primary(1-5 Class)	1	DL/R/VP/TW	2.73992	Richest	1	1	0	0	0	1	PCSBA	1	0	0	TTBA	0	0	0		0	0	0
Midline	27	hindu	Primary(1-5 Class)	3	Service/Overseas worker	2.3983	Richer	1	1	0	0	0	1	PCSBA	1	0	0	TBA	0	0	0		0	0	1
Midline	22	islam	Secondary & higher(9+ Class)	4	Service/Overseas worker	1.57947	Middle	1	1	0	0	0	1	Doctor	1	1	1	PCSBA	0	1	1	PCSBA	1	0	1
Midline	27	islam	Primary(1-5 Class)	4	Service/Overseas worker	1.2134	Poorer	1	1	0	0	0	1	Doctor	1	0	0	TTBA	0	0	0	Drug Seller	0	0	1
Midline	45	islam	No formal education	12	Business	2.3983	Richer	1	1	0	0	0	1	PCSBA	1	0	0	TBA	0	0	0		0	0	0
Midline	17	islam	No formal education	1	DL/R/VP/TW	1.16274	Poorer	0	0	0	0	0	0	Nurse	1	0	1	Doctor	1	1	1	Doctor	1	1	0
Midline	22	islam	Primary(1-5 Class)	1	DL/R/VP/TW	1.50721	Poorer	0	0	0	0	0	0	PCSBA	1	0	1	TBA	0	0	0		0	0	0
Midline	20	islam	Secondary & higher(9+ Class)	1	Farming/Fishing/SL	3.15238	Richest	1	0	0	0	0	0	Doctor	1	0	1	TBA	0	0	0		0	0	0
Midline	25	islam	Primary(1-5 Class)	2	DL/R/VP/TW	2.05409	Middle	0	1	0	0	0	0	PCSBA	1	1	0	PCSBA	1	1	0	Doctor	1	1	1
Midline	20	islam	Junior secondary(6-8 class)	1	Service/Overseas worker	1.57947	Middle	0	1	1	1	1	1	PCSBA	1	1	1	PCSBA	0	1	0	PCSBA	1	0	0
Midline	20	islam	No formal education	1	DL/R/VP/TW	2.14094	Richer	1	0	0	1	0	1	PCSBA	1	0	0	TBA	0	0	0		0	0	0
Midline	17	islam	Junior secondary(6-8 class)	2	Business	1.84932	Middle	1	1	1	0	1	1	PCSBA	1	1	1	TBA	0	0	0		0	0	0
Midline	27	islam	Secondary & higher(9+ Class)	2	Service/Overseas worker	2.72074	Richest	0	1	1	0	0	1	Doctor	1	1	0	PCSBA	0	1	0	PCSBA	1	1	1
Midline	22	islam	Primary(1-5 Class)	1	Others	3.07384	Richest	1	1	0	1	1	1	PCSBA	1	1	1	Nurse	1	1	0	Nurse	1	1	1
Midline	27	islam	Primary(1-5 Class)	3	Farming/Fishing/SL	2.35081	Richer	0	0	0	0	0	0	CHCP	0	0	0	Nurse	1	1	1	Doctor	1	1	0
Midline	31	islam	No formal education	5	DL/R/VP/TW	1.72358	Middle	1	0	0	0	0	0	Other	0	0	0	TBA	0	0	0	Other	0	0	0
Midline	28	islam	No formal education	3	Business	1.19852	Poorer	0	0	0	1	0	0		0	0	0	TBA	0	0	1		0	0	0
Midline	39	islam	No formal education	8	DL/R/VP/TW	1.94839	Middle	0	0	0	1	0	0		0	0	1	TBA	0	0	1		0	0	1
Midline	19	islam	Junior secondary(6-8 class)	1	DL/R/VP/TW	2.01735	Middle	0	0	0	0	0	0	PCSBA	1	1	1	Others	0	0	0		0	0	0
Midline	18	islam	No formal education	1	DL/R/VP/TW	2.05513	Middle	0	0	0	0	0	0	CHCP	0	0	0	TTBA	0	0	0		0	0	0
Midline	22	islam	Primary(1-5 Class)	2	DL/R/VP/TW	1.62824	Middle	0	0	0	0	0	0	Other	0	0	1	TBA	0	0	0		0	0	0
Midline	24	islam	Primary(1-5 Class)	2	DL/R/VP/TW	2.85559	Richest	0	0	0	0	0	0		0	0	0	TTBA	0	0	0		0	0	0
Midline	18	islam	Primary(1-5 Class)	1	Service/Overseas worker	2.76722	Richest	0	0	0	0	0	0	CHCP	0	0	0	Nurse	1	1	1	Doctor	1	1	0
Midline	35	islam	No formal education	5	DL/R/VP/TW	0.814628	Poorest	0	0	0	0	0	0	Doctor	1	0	0	PCSBA	0	1	1	PCSBA	1	0	0
Midline	25	islam	Primary(1-5 Class)	3	Farming/Fishing/SL	1.50007	Poorer	1	0	0	0	0	0	PCSBA	1	0	1	TBA	0	0	0		0	0	0
Midline	21	islam	Primary(1-5 Class)	2	Farming/Fishing/SL	2.22749	Richer	1	0	0	1	0	1	PCSBA	1	0	0	TBA	0	0	0		0	0	0
Midline	21	islam	Secondary & higher(9+ Class)	1	Business	3.00015	Richest	1	1	0	1	1	1	Doctor	1	0	0	Nurse	1	1	1		0	0	1
Midline	21	islam	Primary(1-5 Class)	1	DL/R/VP/TW	1.67852	Middle	1	0	0	0	0	0	PCSBA	1	0	1	TBA	0	0	1		0	0	1
Midline	21	islam	Primary(1-5 Class)	3	Business	1.92406	Middle	1	0	0	0	0	0		0	0	1	TTBA	0	0	1		0	0	1
Midline	18	islam	Primary(1-5 Class)	1	Farming/Fishing/SL	2.3983	Richer	1	0	0	0	0	0	PCSBA	1	0	0	TTBA	0	0	0		0	0	0
Midline	30	islam	Primary(1-5 Class)	6	DL/R/VP/TW	1.52732	Poorer	1	0	0	0	0	0	PCSBA	1	1	0	TBA	0	0	0		0	0	0
Midline	22	islam	No formal education	2	DL/R/VP/TW	0.672969	Poorest	0	0	0	0	0	0	Nurse	1	0	1	TBA	0	0	0	Doctor	1	1	1
Midline	26	islam	Primary(1-5 Class)	4	Farming/Fishing/SL	1.96102	Middle	0	0	0	1	0	0	Doctor	1	0	1	TBA	0	0	0		0	0	0
Midline	26	islam	Primary(1-5 Class)	3	Business	1.94261	Middle	0	1	0	1	0	1	Doctor	1	1	1	PCSBA	0	1	0		0	0	1
Midline	29	islam	No formal education	2	Farming/Fishing/SL	1.57481	Poorer	0	1	0	1	0	1	Doctor	1	1	0	TBA	0	0	0		0	0	0
Midline	30	hindu	Secondary & higher(9+ Class)	2	Business	3.10635	Richest	1	1	0	0	0	1	Doctor	1	0	0	Doctor	1	1	0	Doctor	1	1	0
Midline	22	hindu	No formal education	2	Farming/Fishing/SL	1.56166	Poorer	1	0	0	0	0	0	PCSBA	1	0	0	PCSBA	0	1	0		0	0	0
Midline	25	islam	Secondary & higher(9+ Class)	2	Farming/Fishing/SL	2.60237	Richest	1	1	0	0	0	1	Doctor	1	0	0	TTBA	0	0	0	Drug Seller	0	0	1
Midline	19	islam	No formal education	1	Service/Overseas worker	1.78669	Middle	1	0	0	0	0	0	Other	0	0	0	Nurse	0	1	1	Nurse	1	1	0
Midline	31	islam	Primary(1-5 Class)	4	Farming/Fishing/SL	1.7718	Middle	1	0	0	0	0	0	Doctor	1	1	1	TTBA	0	0	0		0	0	0
Midline	20	hindu	Primary(1-5 Class)	3	Business	2.59663	Richest	1	0	0	0	0	0	Doctor	1	1	1	Doctor	1	1	0	Doctor	1	1	0
Midline	30	islam	No formal education	4	Farming/Fishing/SL	0.485985	Poorest	1	0	0	0	0	0		0	0	0	TBA	0	0	0		0	0	0
Midline	22	islam	No formal education	4	Farming/Fishing/SL	1.23007	Poorer	1	0	0	0	0	0		0	0	0	TBA	0	0	0		0	0	0
Midline	24	islam	Junior secondary(6-8 class)	2	Service/Overseas worker	2.75894	Richest	1	0	0	0	0	0	Doctor	1	1	0	Nurse	1	1	1	Doctor	1	1	0
Midline	20	islam	Primary(1-5 Class)	2	Farming/Fishing/SL	1.5018	Poorer	0	1	1	0	0	1	PCSBA	1	0	0	Nurse	1	1	1	Nurse	1	0	0
Midline	32	islam	No formal education	5	Farming/Fishing/SL	1.12085	Poorer	1	0	0	0	0	0	PCSBA	1	0	0	Others	0	0	0		0	0	0
Midline	29	hindu	Primary(1-5 Class)	2	Farming/Fishing/SL	1.92406	Middle	1	0	0	0	0	0	PCSBA	1	0	0	TBA	0	0	0		0	0	0
Midline	21	islam	Primary(1-5 Class)	3	Business	1.95152	Middle	1	1	0	1	1	1	Nurse	1	0	0	TTBA	0	0	0		0	0	0
Midline	18	islam	Junior secondary(6-8 class)	1	Farming/Fishing/SL	2.22749	Richer	1	1	1	0	1	1	PCSBA	1	1	1	TTBA	0	0	0	PCSBA	1	0	0
Midline	27	islam	Primary(1-5 Class)	3	Farming/Fishing/SL	2.22749	Richer	1	0	0	0	0	0	PCSBA	1	1	0	PCSBA	0	1	0		0	0	0
Midline	20	islam	Primary(1-5 Class)	2	Business	2.6687	Richest	1	1	0	0	0	1	Doctor	1	0	1	TBA	0	0	1	Drug Seller	0	0	1
Midline	24	islam	Secondary & higher(9+ Class)	3	Business	2.46488	Richer	1	1	1	0	1	1	Doctor	1	1	1	PCSBA	0	1	0	PCSBA	1	1	1
Midline	19	islam	Primary(1-5 Class)	1	DL/R/VP/TW	2.01735	Middle	1	0	0	0	0	0	Doctor	1	1	1	Doctor	1	1	1	Doctor	1	1	1
Midline	35	islam	No formal education	8	DL/R/VP/TW	0.315179	Poorest	0	1	0	0	0	0	PCSBA	1	0	0	TTBA	0	0	0		0	0	1
Midline	24	islam	Primary(1-5 Class)	3	Service/Overseas worker	2.08392	Middle	1	0	0	0	0	0	PCSBA	1	1	0	TTBA	0	0	1		0	0	0
Midline	24	hindu	Primary(1-5 Class)	3	Business	2.80388	Richest	1	0	0	0	0	0	PCSBA	1	0	0	PCSBA	0	1	0		0	0	0
Midline	27	islam	No formal education	4	Business	0.757716	Poorest	0	0	0	0	0	0	PCSBA	1	0	1	TTBA	1	0	0		0	0	0
Midline	27	islam	No formal education	3	DL/R/VP/TW	0.485985	Poorest	0	0	0	0	0	0	PCSBA	1	0	0	TBA	0	0	0		0	0	0
Midline	27	hindu	Secondary & higher(9+ Class)	2	Business	2.07375	Middle	1	1	0	0	0	1	Doctor	1	1	1	Doctor	1	1	0	Doctor	1	1	0
Midline	20	hindu	No formal education	2	Farming/Fishing/SL	1.04538	Poorer	1	0	0	0	0	0		0	0	1	TBA	0	0	0		0	0	0
Midline	20	hindu	Primary(1-5 Class)	1	Business	2.50909	Richer	1	0	0	0	0	0	Doctor	1	1	1	Doctor	1	1	1	Nurse	1	1	1
Midline	22	hindu	No formal education	3	DL/R/VP/TW	1.56838	Poorer	1	0	0	0	0	0	PCSBA	1	0	0	PCSBA	0	1	0		0	0	0
Midline	27	islam	Primary(1-5 Class)	3	Farming/Fishing/SL	1.75326	Middle	0	0	0	0	0	0	Other	0	0	1	TBA	0	0	1	Doctor	1	1	1
Midline	22	islam	No formal education	2	Farming/Fishing/SL	2.22749	Richer	1	0	0	0	0	0		0	0	0	TTBA	0	0	0	Drug Seller	0	0	0
Midline	25	hindu	Junior secondary(6-8 class)	2	Business	2.30501	Richer	1	0	0	0	0	0	Doctor	1	1	1	Others	1	0	1		0	0	0
Midline	27	islam	No formal education	3	Farming/Fishing/SL	1.40867	Poorer	1	1	0	0	0	1	Doctor	1	0	1	TBA	0	0	0	Doctor	1	0	1
Midline	26	islam	No formal education	3	DL/R/VP/TW	1.13867	Poorer	1	1	0	0	0	1	PCSBA	1	1	0	PCSBA	0	1	1		0	0	0
Midline	21	islam	Secondary & higher(9+ Class)	2	Farming/Fishing/SL	2.60237	Richest	1	1	0	0	0	1	Doctor	1	0	0	Doctor	1	1	0	Doctor	1	1	0
Midline	27	islam	Junior secondary(6-8 class)	2	Farming/Fishing/SL	1.84932	Middle	1	1	0	0	0	1	Doctor	1	1	1	Nurse	1	1	0	Nurse	1	1	0
Midline	23	islam	Junior secondary(6-8 class)	2	DL/R/VP/TW	0.997896	Poorer	0	1	0	0	0	0	Doctor	1	0	0	TBA	0	0	0		0	0	0
Midline	39	islam	Primary(1-5 Class)	7	Business	3.21046	Richest	1	0	0	0	0	0		0	0	0	PCSBA	0	1	0		0	0	0
Midline	20	islam	Secondary & higher(9+ Class)	1	Farming/Fishing/SL	3.0142	Richest	1	0	0	0	0	0	Doctor	1	0	0	Doctor	0	1	0	Doctor	1	1	0
Midline	23	islam	No formal education	3	Farming/Fishing/SL	2.3983	Richer	1	1	0	1	1	1	PCSBA	1	1	0	PCSBA	0	1	0	PCSBA	1	1	0
Midline	38	islam	No formal education	8	Business	1.94261	Middle	0	0	0	0	0	0	PCSBA	1	0	0	PCSBA	0	1	0		0	0	0
Midline	21	hindu	Junior secondary(6-8 class)	1	Business	2.77663	Richest	0	0	0	0	0	0	Doctor	1	1	0	Doctor	1	1	0	Doctor	1	1	0
Midline	28	islam	Primary(1-5 Class)	4	DL/R/VP/TW	1.57947	Middle	0	0	0	0	0	0	Doctor	1	0	0	TBA	0	0	0		0	0	0
Midline	41	islam	Primary(1-5 Class)	4	DL/R/VP/TW	1.337	Poorer	1	0	0	0	0	0		0	0	0	TBA	0	0	0		0	0	0
Midline	19	islam	Secondary & higher(9+ Class)	1	Service/Overseas worker	2.56314	Richer	1	1	0	0	0	1	Doctor	1	1	1	TTBA	1	0	1	Doctor	1	1	1
Midline	22	islam	No formal education	3	Business	2.1049	Middle	0	0	0	0	0	0	PCSBA	1	0	0	TBA	0	0	0		0	0	1
Midline	22	islam	Primary(1-5 Class)	2	Farming/Fishing/SL	1.21152	Poorer	0	0	0	1	0	0	PCSBA	1	0	1	TBA	0	0	0		0	0	0
Midline	24	islam	Primary(1-5 Class)	2	DL/R/VP/TW	1.40852	Poorer	0	0	0	1	0	0	Doctor	1	0	0	TTBA	0	0	0		0	0	0
Midline	28	islam	Primary(1-5 Class)	4	DL/R/VP/TW	2.22749	Richer	0	1	0	0	0	0	PCSBA	1	0	0	PCSBA	0	1	0	Other	0	0	0
Midline	20	islam	Primary(1-5 Class)	1	DL/R/VP/TW	1.96986	Middle	0	1	0	1	0	1	Nurse	1	0	0	Nurse	1	1	1	Nurse	1	1	1
Midline	20	islam	Secondary & higher(9+ Class)	1	Service/Overseas worker	1.57947	Middle	0	0	0	0	0	0	Nurse	1	0	0	TTBA	0	0	0		0	0	0
Midline	24	islam	Junior secondary(6-8 class)	2	DL/R/VP/TW	2.34081	Richer	1	1	0	0	0	1	Doctor	1	0	0	TTBA	0	0	0		0	0	0
Midline	31	islam	No formal education	6	Business	2.3983	Richer	1	0	0	0	0	0	Drug Seller	0	0	0	PCSBA	0	1	0		0	0	0
Midline	39	islam	No formal education	7	Farming/Fishing/SL	2.60237	Richest	1	0	0	0	0	0	PCSBA	1	0	1	PCSBA	0	1	0	PCSBA	1	1	0
Midline	35	islam	No formal education	5	Farming/Fishing/SL	2.93825	Richest	1	1	0	0	0	1	Nurse	1	0	0	TBA	0	0	0		0	0	0
Midline	28	islam	Primary(1-5 Class)	3	Business	2.59663	Richest	1	0	0	0	0	0	PCSBA	1	0	0	TBA	0	0	0		0	0	0
Midline	23	islam	Primary(1-5 Class)	3	Farming/Fishing/SL	2.3983	Richer	1	0	0	0	0	0	CHCP	0	0	0	Others	0	0	0		0	0	1
Midline	29	islam	No formal education	4	DL/R/VP/TW	1.39085	Poorer	1	0	0	0	0	0		0	0	0	TBA	0	0	0		0	0	0
Midline	23	islam	Primary(1-5 Class)	3	Farming/Fishing/SL	0.757716	Poorest	1	0	0	1	0	1	Other	0	0	1	Others	0	0	0		0	0	0
Midline	18	islam	Primary(1-5 Class)	1	Farming/Fishing/SL	2.3983	Richer	0	0	0	0	0	0	Other	0	0	0	Others	0	0	0	Drug Seller	0	0	0
Midline	27	islam	Junior secondary(6-8 class)	4	Others	1.7702	Middle	0	0	0	1	0	0	Other	0	0	0	TTBA	0	0	0		0	0	0
Midline	24	islam	No formal education	3	DL/R/VP/TW	1.57481	Poorer	0	0	0	0	0	0		0	0	0	TTBA	0	0	1		0	0	0
Midline	28	islam	Junior secondary(6-8 class)	5	DL/R/VP/TW	2.44098	Richer	0	0	0	0	0	0	Doctor	1	0	1	TTBA	0	0	0		0	0	1
Midline	24	islam	No formal education	3	DL/R/VP/TW	1.74561	Middle	0	0	0	0	0	0	Other	0	0	1	TTBA	0	0	0		0	0	0
Midline	30	islam	No formal education	4	DL/R/VP/TW	0.3927	Poorest	1	0	0	0	0	0		0	0	1	TBA	0	0	0		0	0	1
Midline	22	islam	Primary(1-5 Class)	2	Farming/Fishing/SL	2.37159	Richer	1	0	0	0	0	0	Other	0	0	1	TBA	0	0	1	Doctor	1	1	0
Midline	24	islam	Primary(1-5 Class)	4	DL/R/VP/TW	0.664431	Poorest	1	1	0	0	0	1	Doctor	1	0	1	TBA	0	0	0	Doctor	1	0	1
Midline	20	islam	Primary(1-5 Class)	1	Farming/Fishing/SL	1.45081	Poorer	0	0	0	0	0	0	Doctor	1	0	1	TBA	0	0	0		0	0	0
Midline	22	islam	Junior secondary(6-8 class)	1	Farming/Fishing/SL	1.56166	Poorer	0	1	1	0	0	1	Doctor	1	0	1	Doctor	1	1	0	Doctor	1	1	1
Midline	21	islam	No formal education	4	Farming/Fishing/SL	0.58691	Poorest	1	0	0	0	0	0	Drug Seller	0	0	1	Others	0	0	1		0	0	0
Midline	20	islam	No formal education	3	Business	1.06491	Poorer	0	1	1	0	0	1		0	0	0	TTBA	0	0	0		0	0	1
Midline	20	islam	Junior secondary(6-8 class)	1	DL/R/VP/TW	2.3241	Richer	1	0	0	1	0	1	Nurse	1	0	1	PCSBA	0	1	0		0	0	0
Midline	29	islam	Junior secondary(6-8 class)	3	Others	2.18862	Richer	1	0	0	0	0	0	Nurse	1	0	1	Nurse	1	1	1	Doctor	1	1	0
Midline	18	islam	Junior secondary(6-8 class)	1	Business	2.07426	Middle	1	0	0	1	0	1	Nurse	1	0	0	TBA	0	0	0		0	0	0
Midline	22	islam	Junior secondary(6-8 class)	1	Others	1.27133	Poorer	0	0	0	1	0	0	PCSBA	1	0	1	TTBA	0	0	0		0	0	0
Midline	33	islam	No formal education	7	Farming/Fishing/SL	1.0491	Poorer	0	0	0	1	0	0	Other	0	0	0	TTBA	0	0	0		0	0	1
Midline	32	islam	Primary(1-5 Class)	4	Farming/Fishing/SL	2.41266	Richer	1	0	0	0	0	0		0	0	0	TBA	0	0	0		0	0	0
Midline	26	islam	Primary(1-5 Class)	3	Farming/Fishing/SL	1.1015	Poorer	1	0	0	0	0	0	PCSBA	1	0	0	Others	0	0	0		0	0	1
Midline	17	islam	Junior secondary(6-8 class)	1	Business	2.35081	Richer	1	0	0	0	0	0	PCSBA	1	0	0	TBA	0	0	0		0	0	0
Midline	24	islam	Junior secondary(6-8 class)	2	Business	2.22749	Richer	1	0	0	0	0	0	Doctor	1	0	0	Doctor	1	1	0	Doctor	1	1	0
Midline	20	islam	Secondary & higher(9+ Class)	1	Service/Overseas worker	2.68681	Richest	1	0	0	0	0	0	Doctor	1	0	0	TBA	0	0	0	Drug Seller	1	1	0
Midline	25	islam	Junior secondary(6-8 class)	3	Farming/Fishing/SL	3.04154	Richest	1	0	0	0	0	0	Doctor	1	0	0	TBA	0	0	0		0	0	0
Midline	23	islam	Primary(1-5 Class)	2	Farming/Fishing/SL	1.35752	Poorer	1	1	0	0	0	1	PCSBA	1	1	0	PCSBA	0	1	0	PCSBA	1	1	1
Midline	29	islam	Primary(1-5 Class)	5	Service/Overseas worker	0.6627	Poorest	0	1	0	0	0	0	PCSBA	1	0	0	TBA	0	0	1		0	0	1
Midline	28	islam	No formal education	3	DL/R/VP/TW	1.13679	Poorer	1	0	0	0	0	0		0	0	1	TBA	0	0	0		0	0	1
Midline	25	hindu	Secondary & higher(9+ Class)	1	Service/Overseas worker	2.3983	Richer	0	0	0	0	0	0	Doctor	1	1	1	TBA	0	0	0	Doctor	1	0	1
Midline	32	hindu	No formal education	4	DL/R/VP/TW	1.13867	Poorer	0	0	0	0	0	0	PCSBA	1	0	0	TBA	0	0	0		0	0	1
Midline	24	hindu	Junior secondary(6-8 class)	2	Farming/Fishing/SL	1.11505	Poorer	1	0	0	0	0	0	PCSBA	1	0	0	PCSBA	0	1	0		0	0	0
Midline	25	islam	No formal education	3	Business	2.45521	Richer	1	0	0	0	0	0	Drug Seller	0	0	0	TTBA	0	0	0		0	0	0
Midline	24	islam	Junior secondary(6-8 class)	3	DL/R/VP/TW	1.7718	Middle	1	0	0	0	0	0		0	0	0	TBA	0	0	0		0	0	0
Midline	35	islam	No formal education	6	Service/Overseas worker	1.57481	Poorer	1	0	0	0	0	0		0	0	0	TBA	0	0	0		0	0	0
Midline	19	islam	Primary(1-5 Class)	1	Farming/Fishing/SL	2.67837	Richest	1	0	0	0	0	0	Doctor	1	0	1	TBA	0	0	0		0	0	0
Midline	30	hindu	Primary(1-5 Class)	3	Farming/Fishing/SL	2.18219	Richer	1	1	0	0	0	1	Doctor	1	1	1	TTBA	0	0	0		0	0	1
Midline	28	hindu	No formal education	2	Farming/Fishing/SL	1.57654	Middle	1	1	0	0	0	1	Other	0	0	0	TTBA	0	0	0		0	0	1
Midline	25	islam	Primary(1-5 Class)	2	DL/R/VP/TW	1.23826	Poorer	0	0	0	0	0	0	CHCP	0	0	1	PCSBA	0	1	1		0	0	0
Midline	25	islam	Primary(1-5 Class)	4	DL/R/VP/TW	1.09951	Poorer	1	1	0	0	0	1	PCSBA	1	0	1	TTBA	0	0	0	PCSBA	1	1	0
Midline	27	islam	Secondary & higher(9+ Class)	3	Farming/Fishing/SL	2.72118	Richest	1	1	1	0	1	1	Doctor	1	1	1	TTBA	0	0	1		0	0	1
Midline	28	islam	Primary(1-5 Class)	3	Farming/Fishing/SL	2.26963	Richer	0	1	0	1	0	1	PCSBA	1	0	0	PCSBA	0	1	0		0	0	0
Midline	23	islam	Primary(1-5 Class)	5	DL/R/VP/TW	0.315179	Poorest	1	0	0	0	0	0		0	0	1	TTBA	0	0	0		0	0	0
Midline	37	islam	No formal education	3	Others	1.48046	Poorer	1	1	0	0	0	1	PCSBA	1	0	0	Nurse	0	1	1		0	0	1
Midline	30	islam	No formal education	3	Farming/Fishing/SL	2.8099	Richest	1	0	0	0	0	0	CHCP	0	0	0	TBA	0	0	0	Drug Seller	0	0	0
Midline	20	islam	Primary(1-5 Class)	1	DL/R/VP/TW	1.73464	Middle	1	1	0	0	0	1	Nurse	1	0	0	TBA	0	0	0		0	0	0
Midline	30	islam	Junior secondary(6-8 class)	1	DL/R/VP/TW	1.5209	Poorer	1	1	0	0	0	1	Nurse	1	0	1	Doctor	1	1	0	Doctor	1	1	0
Midline	20	islam	Secondary & higher(9+ Class)	2	Farming/Fishing/SL	2.98754	Richest	1	1	0	0	0	1	Other	0	0	1	TTBA	0	0	0		0	0	1
Midline	25	islam	No formal education	4	DL/R/VP/TW	0.757716	Poorest	1	0	0	0	0	0	Doctor	1	0	0	TBA	0	0	0		0	0	0
Midline	32	islam	No formal education	6	DL/R/VP/TW	0.963943	Poorer	1	0	0	0	0	0		0	0	0	TBA	0	0	0		0	0	0
Midline	28	islam	No formal education	4	Farming/Fishing/SL	0.926791	Poorer	0	0	0	0	0	0		0	0	0	TBA	0	0	0		0	0	0
Midline	20	islam	No formal education	1	DL/R/VP/TW	0.309833	Poorest	0	0	0	0	0	0	PCSBA	1	0	0	TBA	0	0	1		0	0	0
Midline	20	islam	Junior secondary(6-8 class)	2	Business	2.3983	Richer	1	0	0	0	0	0	PCSBA	1	0	0	TBA	0	0	0		0	0	1
Midline	20	islam	Primary(1-5 Class)	1	DL/R/VP/TW	1.84932	Middle	1	1	0	0	0	1	Doctor	1	1	0	Nurse	1	1	0	Nurse	1	0	0
Midline	22	islam	No formal education	3	Farming/Fishing/SL	0.581564	Poorest	1	0	0	0	0	0		0	0	0	TBA	0	0	1		0	0	0
Midline	29	islam	Secondary & higher(9+ Class)	5	Business	2.36192	Richer	1	0	0	0	0	0	Doctor	1	0	1	TTBA	0	0	0		0	0	0
Midline	26	hindu	Junior secondary(6-8 class)	2	Farming/Fishing/SL	2.06664	Middle	1	0	0	0	0	0	Doctor	1	0	1	Doctor	1	1	1	Nurse	1	1	0
Midline	27	islam	Secondary & higher(9+ Class)	2	Service/Overseas worker	2.57427	Richest	1	0	0	0	0	0	Doctor	1	0	0	PCSBA	0	1	0		0	0	0
Midline	16	islam	Primary(1-5 Class)	1	Service/Overseas worker	3.0142	Richest	0	1	0	0	0	0		0	0	0	Others	0	0	0		0	0	0
Midline	23	islam	Primary(1-5 Class)	2	Farming/Fishing/SL	1.05927	Poorer	1	0	0	0	0	0		0	0	1	TBA	0	0	0		0	0	0
Midline	23	islam	Primary(1-5 Class)	2	DL/R/VP/TW	1.95749	Middle	1	0	0	0	0	0		0	0	0	TTBA	0	0	0		0	0	0
Midline	20	islam	Secondary & higher(9+ Class)	1	Business	2.3983	Richer	1	1	1	1	1	1	CHCP	0	0	0	TTBA	0	0	0		0	0	0
Midline	31	islam	No formal education	5	DL/R/VP/TW	0.542897	Poorest	1	0	0	0	0	0	PCSBA	1	0	0	TTBA	0	0	0		0	0	0
Midline	27	islam	Junior secondary(6-8 class)	4	DL/R/VP/TW	1.25543	Poorer	1	0	0	0	0	0	CHCP	0	0	1	TBA	0	0	0		0	0	1
Midline	19	islam	Primary(1-5 Class)	1	Farming/Fishing/SL	2.56314	Richer	1	1	0	1	1	1	CHCP	1	0	0	TTBA	0	0	0		0	0	0
Midline	29	islam	No formal education	9	Others	1.0491	Poorer	1	0	0	0	0	0	PCSBA	1	0	0	TBA	0	0	0		0	0	0
Midline	22	islam	Primary(1-5 Class)	1	Farming/Fishing/SL	2.57541	Richest	1	1	1	0	1	1		0	0	0	TTBA	0	0	0		0	0	0
Midline	18	islam	No formal education	1	DL/R/VP/TW	0.186513	Poorest	1	0	0	0	0	0		0	0	0	TBA	0	0	0		0	0	1
Midline	25	islam	Primary(1-5 Class)	3	Farming/Fishing/SL	1.57947	Middle	0	0	0	0	0	0	Doctor	1	0	1	TTBA	0	0	0		0	0	0
Midline	35	islam	No formal education	4	DL/R/VP/TW	2.1561	Richer	1	0	0	0	0	0		0	0	0	TBA	0	0	0	Other	0	0	1
Midline	21	islam	Primary(1-5 Class)	2	DL/R/VP/TW	1.06986	Poorer	0	1	0	0	0	0	Drug Seller	0	0	1	TTBA	0	0	0		0	0	0
Midline	32	islam	Junior secondary(6-8 class)	3	DL/R/VP/TW	1.98018	Middle	1	0	0	0	0	0	Other	0	0	0	Others	0	0	1		0	0	1
Midline	21	islam	Junior secondary(6-8 class)	1	DL/R/VP/TW	2.29407	Richer	1	1	1	1	1	1	Doctor	1	1	0	PCSBA	0	1	0	PCSBA	1	1	0
Midline	25	islam	Primary(1-5 Class)	4	DL/R/VP/TW	2.22749	Richer	1	1	0	1	1	1	Nurse	1	0	1	TTBA	0	0	0		0	0	0
Midline	30	hindu	Secondary & higher(9+ Class)	3	Farming/Fishing/SL	2.01735	Middle	1	0	0	1	0	1	Drug Seller	0	0	1	TTBA	0	0	0		0	0	0
Midline	43	islam	No formal education	9	DL/R/VP/TW	2.3983	Richer	1	0	0	0	0	0		0	0	0	TBA	0	0	0	TBA/TTBA	0	0	0
Midline	20	islam	Primary(1-5 Class)	1	DL/R/VP/TW	2.3983	Richer	1	1	0	0	0	1	PCSBA	1	1	0	TTBA	0	0	0	PCSBA	1	1	0
Midline	31	islam	Primary(1-5 Class)	5	Farming/Fishing/SL	2.30501	Richer	0	1	1	0	0	1	Drug Seller	0	0	1	Nurse	1	1	1		0	0	0
Midline	21	islam	Primary(1-5 Class)	1	Farming/Fishing/SL	1.5018	Poorer	0	1	0	0	0	0	Drug Seller	0	0	0	TBA	0	0	1		0	0	1
Midline	27	islam	No formal education	4	Farming/Fishing/SL	2.30501	Richer	0	1	0	0	0	0	PCSBA	1	0	0	TBA	0	0	0		0	0	0
Midline	24	islam	Primary(1-5 Class)	2	Farming/Fishing/SL	2.61179	Richest	0	1	1	1	1	1	PCSBA	1	0	0	PCSBA	0	1	0		0	0	0
Midline	17	islam	No formal education	1	DL/R/VP/TW	1.40852	Poorer	0	1	1	0	0	1	Doctor	1	0	1	Others	0	0	0	Drug Seller	0	0	1
Midline	28	islam	Primary(1-5 Class)	3	Business	2.3983	Richer	1	0	0	1	0	1	PCSBA	1	0	0	TBA	0	0	0		0	0	1
Midline	23	islam	Junior secondary(6-8 class)	2	Business	2.93825	Richest	1	1	0	1	1	1	Doctor	1	0	0	TTBA	0	0	0		0	0	0
Midline	31	islam	Secondary & higher(9+ Class)	4	Service/Overseas worker	2.3983	Richer	1	1	0	1	1	1	PCSBA	1	0	0	TBA	0	0	0		0	0	1
Midline	26	islam	No formal education	2	Service/Overseas worker	1.94261	Middle	1	1	0	0	0	1	Doctor	1	0	0	TBA	0	0	1	Drug Seller	0	0	0
Midline	26	islam	Junior secondary(6-8 class)	2	Service/Overseas worker	1.19852	Poorer	1	1	0	0	0	1	Nurse	1	0	0	TTBA	0	0	0		0	0	0
Midline	20	islam	Junior secondary(6-8 class)	2	DL/R/VP/TW	1.62948	Middle	1	1	0	1	1	1	CHCP	0	0	0	TBA	0	0	0		0	0	1
Midline	32	islam	No formal education	8	DL/R/VP/TW	0.186513	Poorest	0	0	0	1	0	0	PCSBA	1	1	0	PCSBA	0	1	0	PCSBA	1	1	0
Midline	18	islam	Primary(1-5 Class)	1	DL/R/VP/TW	1.57654	Middle	1	0	0	0	0	0	Nurse	1	0	0	TBA	0	0	0		0	0	0
Midline	33	islam	No formal education	7	Farming/Fishing/SL	1.331	Poorer	1	0	1	0	0	1	PCSBA	1	1	1	TTBA	0	0	1	PCSBA	1	0	1
Midline	20	islam	Junior secondary(6-8 class)	1	Farming/Fishing/SL	3.43245	Richest	1	1	1	0	1	1	PCSBA	1	0	0	PCSBA	0	1	1		0	0	0
Midline	20	islam	No formal education	2	DL/R/VP/TW	1.22958	Poorer	0	1	1	0	0	1	PCSBA	1	0	1	TTBA	0	0	1		0	0	0
Midline	37	islam	No formal education	7	DL/R/VP/TW	0.878291	Poorest	1	1	0	1	1	1	Doctor	1	0	0	TTBA	0	0	0		0	0	0
Midline	35	hindu	Primary(1-5 Class)	2	DL/R/VP/TW	0.685962	Poorest	1	0	0	0	0	0	Nurse	1	0	0	TBA	0	0	0		0	0	0
Midline	20	hindu	Primary(1-5 Class)	2	DL/R/VP/TW	2.3983	Richer	1	0	0	0	0	0	Doctor	1	0	1	TBA	0	0	0		0	0	0
Midline	27	islam	Primary(1-5 Class)	3	Farming/Fishing/SL	0.616945	Poorest	1	0	0	0	0	0	Other	0	0	0	TBA	0	0	1		0	0	1
Midline	25	hindu	No formal education	4	Farming/Fishing/SL	0.643822	Poorest	1	0	0	0	0	0		0	0	0	Others	0	0	0		0	0	0
Midline	30	islam	Secondary & higher(9+ Class)	4	Farming/Fishing/SL	2.41976	Richer	1	0	0	0	0	0	PCSBA	1	1	0	PCSBA	0	1	1	PCSBA	1	1	0
Midline	18	islam	Primary(1-5 Class)	1	DL/R/VP/TW	0.627267	Poorest	0	0	0	0	0	0	Doctor	1	1	0	TTBA	0	0	0		0	0	1
Midline	25	islam	Primary(1-5 Class)	3	Farming/Fishing/SL	2.44759	Richer	0	1	0	0	0	0	PCSBA	1	1	0	TTBA	0	0	0		0	0	1
Midline	24	islam	Primary(1-5 Class)	3	DL/R/VP/TW	1.04538	Poorer	0	1	0	0	0	0		0	0	0	TBA	0	0	0		0	0	0
Midline	23	islam	Primary(1-5 Class)	5	DL/R/VP/TW	2.30501	Richer	0	0	0	0	0	0		0	0	0	TBA	0	0	0		0	0	0
Midline	25	islam	Primary(1-5 Class)	3	DL/R/VP/TW	2.30501	Richer	0	1	0	0	0	0		0	0	0	TBA	0	0	0		0	0	0
Midline	32	hindu	Junior secondary(6-8 class)	4	Farming/Fishing/SL	2.13421	Richer	1	1	0	1	1	1	Doctor	1	1	1	PCSBA	0	1	1	PCSBA	1	0	0
Midline	34	islam	No formal education	6	Farming/Fishing/SL	0.485985	Poorest	1	0	0	0	0	0	PCSBA	1	0	0	PCSBA	1	1	0	PCSBA	1	1	0
Midline	22	islam	Primary(1-5 Class)	4	Farming/Fishing/SL	2.3983	Richer	1	0	0	0	0	0	PCSBA	1	0	0	TBA	0	0	1		0	0	0
Midline	26	islam	Primary(1-5 Class)	1	Farming/Fishing/SL	1.46464	Poorer	1	0	0	1	0	1	PCSBA	1	0	1	TBA	0	0	0		0	0	0
Midline	21	islam	Primary(1-5 Class)	2	Farming/Fishing/SL	2.22749	Richer	1	1	0	1	1	1	CHCP	0	0	0	TBA	0	0	0		0	0	0
Midline	27	islam	Primary(1-5 Class)	6	Business	3.10952	Richest	1	1	1	0	1	1	Doctor	1	1	1	Doctor	1	1	1	Doctor	1	1	0
Midline	31	islam	Primary(1-5 Class)	4	DL/R/VP/TW	1.17194	Poorer	0	0	0	1	0	0	Nurse	1	0	0	TBA	0	0	0		0	0	0
Midline	19	islam	Secondary & higher(9+ Class)	1	DL/R/VP/TW	2.00997	Middle	1	1	0	1	1	1	Doctor	1	1	1	TBA	0	0	1	Drug Seller	0	0	1
Midline	22	islam	Primary(1-5 Class)	2	DL/R/VP/TW	1.52905	Poorer	0	1	1	1	1	1	Other	0	0	1	TTBA	0	0	1		0	0	1
Midline	20	islam	Primary(1-5 Class)	2	DL/R/VP/TW	2.35527	Richer	1	1	0	1	1	1	PCSBA	1	0	0	PCSBA	0	1	1	PCSBA	1	0	0
Midline	20	islam	Primary(1-5 Class)	1	Farming/Fishing/SL	1.48619	Poorer	1	0	0	0	0	0	Doctor	1	0	1	TBA	0	0	0		0	0	0
Midline	20	islam	Primary(1-5 Class)	1	DL/R/VP/TW	2.01735	Middle	1	1	0	0	0	1		0	0	1	TBA	0	0	1		0	0	0
Midline	35	hindu	Secondary & higher(9+ Class)	3	Farming/Fishing/SL	1.8642	Middle	1	0	0	0	0	0	PCSBA	1	0	0	TTBA	0	0	0		0	0	0
Midline	23	islam	Primary(1-5 Class)	1	Service/Overseas worker	3.17904	Richest	1	1	0	0	0	1	CHCP	0	0	0	TTBA	0	0	0		0	0	0
Midline	20	islam	Primary(1-5 Class)	3	Others	1.98018	Middle	1	1	0	1	1	1		0	0	1	PCSBA	0	1	1	PCSBA	1	1	1
Midline	40	islam	No formal education	10	DL/R/VP/TW	0.62905	Poorest	1	1	0	0	0	1	PCSBA	1	0	1	TTBA	0	0	1		0	0	0
Midline	27	islam	Secondary & higher(9+ Class)	2	Service/Overseas worker	1.45432	Poorer	0	1	1	0	0	1	PCSBA	1	0	0	TBA	0	0	1		0	0	0
Midline	32	islam	Junior secondary(6-8 class)	4	Farming/Fishing/SL	2.65929	Richest	1	0	0	1	0	1	Doctor	1	0	1	TBA	0	0	0		0	0	0
Midline	18	islam	Primary(1-5 Class)	1	DL/R/VP/TW	1.56838	Poorer	1	0	0	0	0	0	PCSBA	1	1	0	PCSBA	0	1	0		0	0	0
Midline	30	islam	No formal education	3	Service/Overseas worker	2.21848	Richer	1	1	0	0	0	1	Doctor	1	0	1	Nurse	1	1	1	Doctor	1	1	0
Midline	25	islam	Primary(1-5 Class)	2	Business	2.3983	Richer	1	1	0	0	0	1	Nurse	1	1	1	Nurse	1	1	1	CHCP	1	1	0
Midline	40	islam	No formal education	6	Business	0.493625	Poorest	0	0	0	0	0	0		0	0	0	TBA	0	0	0		0	0	1
Midline	22	islam	Primary(1-5 Class)	3	DL/R/VP/TW	0.753042	Poorest	1	0	0	0	0	0	PCSBA	1	0	1	PCSBA	0	1	0	PCSBA	1	0	0
Midline	20	islam	Primary(1-5 Class)	1	DL/R/VP/TW	1.92406	Middle	1	1	0	0	0	1	Other	0	0	0	TBA	0	0	0		0	0	0
Midline	19	islam	Junior secondary(6-8 class)	2	DL/R/VP/TW	1.13867	Poorer	1	1	0	0	0	1	PCSBA	1	0	0	PCSBA	0	1	0	PCSBA	1	1	0
Midline	20	islam	Primary(1-5 Class)	1	Farming/Fishing/SL	2.6687	Richest	1	1	1	0	1	1		0	0	1	Nurse	1	1	1	Nurse	1	1	0
Midline	22	hindu	Secondary & higher(9+ Class)	1	Farming/Fishing/SL	2.13755	Richer	1	0	0	0	0	0		0	0	1	Nurse	1	1	1	Nurse	1	1	0
Midline	29	hindu	Junior secondary(6-8 class)	3	Business	0.493625	Poorest	1	0	0	0	0	0	Doctor	1	0	1	TBA	0	0	0		0	0	0
Midline	34	islam	Primary(1-5 Class)	6	DL/R/VP/TW	1.40852	Poorer	1	1	0	0	0	1	Other	0	0	1	TTBA	0	0	0		0	0	0
Midline	25	hindu	Primary(1-5 Class)	2	Business	2.96795	Richest	1	1	0	0	0	1	Doctor	1	1	0	Doctor	1	1	1	PCSBA	1	0	0
Midline	22	hindu	Secondary & higher(9+ Class)	1	DL/R/VP/TW	2.45078	Richer	0	1	1	1	1	1	Other	0	0	0	Others	1	0	1	Other	0	0	0
Midline	18	hindu	Primary(1-5 Class)	1	Business	2.61179	Richest	1	1	1	0	1	1	PCSBA	1	1	0	Drug Seller	0	0	0	PCSBA	1	1	0
Midline	22	islam	Primary(1-5 Class)	3	DL/R/VP/TW	0.414231	Poorest	1	0	0	0	0	0		0	0	0	Others	0	0	0		0	0	0
Midline	21	islam	Primary(1-5 Class)	1	Farming/Fishing/SL	1.74561	Middle	1	1	0	0	0	1		0	0	0	TBA	0	0	0		0	0	0
Midline	24	hindu	Primary(1-5 Class)	2	DL/R/VP/TW	0.221894	Poorest	1	0	0	0	0	0	PCSBA	1	0	0	TTBA	0	0	0		0	0	0
Midline	25	hindu	No formal education	1	DL/R/VP/TW	1.6934	Middle	1	1	0	0	0	1	Doctor	1	1	1	Nurse	1	1	1		0	0	0
Midline	18	islam	Primary(1-5 Class)	1	Farming/Fishing/SL	2.82529	Richest	0	1	0	0	0	0	Doctor	1	0	0	Nurse	1	1	0	Doctor	1	1	0
Midline	20	islam	Primary(1-5 Class)	1	DL/R/VP/TW	1.67088	Middle	0	0	0	0	0	0	Doctor	1	0	0	TBA	0	0	0		0	0	0
Midline	20	islam	Primary(1-5 Class)	1	Farming/Fishing/SL	2.5643	Richer	1	0	0	0	0	0	Doctor	1	1	1	Doctor	1	1	1	Doctor	1	1	0
Midline	22	islam	Primary(1-5 Class)	2	Farming/Fishing/SL	1.57947	Middle	1	0	0	1	0	1	Other	0	0	0	TBA	0	0	0	Other	0	0	0
Midline	30	islam	No formal education	4	Others	2.76722	Richest	1	0	0	0	0	0	PCSBA	1	0	1	Nurse	1	1	1	Doctor	1	1	0
Midline	21	islam	Primary(1-5 Class)	1	Service/Overseas worker	2.01735	Middle	1	0	0	0	0	0	PCSBA	1	0	0	PCSBA	0	1	1		0	0	0
Midline	22	islam	Primary(1-5 Class)	3	Service/Overseas worker	2.3983	Richer	1	0	0	0	0	0	PCSBA	1	0	0	PCSBA	0	1	1	PCSBA	1	1	0
Midline	26	islam	Primary(1-5 Class)	4	DL/R/VP/TW	2.30501	Richer	1	1	0	0	0	1	PCSBA	1	0	0	TTBA	0	0	0		0	0	0
Midline	18	islam	Primary(1-5 Class)	1	DL/R/VP/TW	2.3983	Richer	1	0	0	0	0	0	Doctor	1	1	1	PCSBA	0	1	1	PCSBA	1	1	1
Midline	22	hindu	Primary(1-5 Class)	1	Farming/Fishing/SL	1.81672	Middle	1	0	0	0	0	0		0	0	1	TTBA	0	0	0		0	0	0
Midline	30	islam	No formal education	6	Business	0.950046	Poorer	0	1	1	0	0	1	Drug Seller	0	0	1	TBA	0	0	0	Drug Seller	0	0	1
Midline	21	islam	Secondary & higher(9+ Class)	1	DL/R/VP/TW	1.55871	Poorer	1	1	1	0	1	1	Doctor	1	1	1	Doctor	1	1	1	Doctor	1	1	1
Midline	20	islam	Primary(1-5 Class)	1	DL/R/VP/TW	1.5018	Poorer	1	1	0	0	0	1	Nurse	1	0	0	TBA	0	0	0		0	0	0
Midline	30	islam	Primary(1-5 Class)	6	Farming/Fishing/SL	1.5018	Poorer	1	1	0	0	0	1		0	0	0	TBA	0	0	0		0	0	0
Midline	18	islam	Primary(1-5 Class)	1	Farming/Fishing/SL	2.6687	Richest	1	0	0	0	0	0	PCSBA	1	0	0	TBA	0	0	0	Doctor	1	1	0
Midline	25	islam	Primary(1-5 Class)	3	DL/R/VP/TW	1.40867	Poorer	1	0	0	0	0	0	Doctor	1	0	0	Nurse	1	1	0	Doctor	1	1	1
Midline	20	islam	Secondary & higher(9+ Class)	1	Business	3.31658	Richest	1	0	0	1	0	1	CHCP	0	0	0	TBA	0	0	1		0	0	1
Midline	19	islam	Secondary & higher(9+ Class)	1	Service/Overseas worker	3.48493	Richest	1	0	0	0	0	0	Doctor	1	0	0	TTBA	0	0	0	TBA/TTBA	0	0	0
Midline	18	islam	Primary(1-5 Class)	1	Farming/Fishing/SL	2.59641	Richest	0	0	0	0	0	0	Nurse	1	0	0	TBA	0	0	1		0	0	0
Midline	40	islam	No formal education	6	Business	2.22142	Richer	1	0	0	0	0	0		0	0	0	TBA	0	0	1		0	0	0
Midline	26	islam	Junior secondary(6-8 class)	3	DL/R/VP/TW	0.710093	Poorest	1	0	1	1	1	1	PCSBA	1	0	0	PCSBA	0	1	0	PCSBA	1	1	0
Midline	25	islam	Primary(1-5 Class)	3	DL/R/VP/TW	2.55489	Richer	1	0	0	0	0	0	Doctor	1	1	1	TTBA	0	0	0		0	0	1
Midline	24	islam	Primary(1-5 Class)	3	DL/R/VP/TW	2.26963	Richer	0	1	0	0	0	0	PCSBA	1	0	0	TBA	0	0	0		0	0	0
Midline	21	islam	Primary(1-5 Class)	2	Farming/Fishing/SL	2.79683	Richest	0	1	0	0	0	0	Doctor	1	1	1	TTBA	0	0	0		0	0	0
Midline	18	islam	Primary(1-5 Class)	1	DL/R/VP/TW	2.45521	Richer	0	1	0	0	0	0	Doctor	1	1	0	PCSBA	0	1	1	PCSBA	1	1	0
Midline	24	islam	No formal education	2	DL/R/VP/TW	2.22749	Richer	1	0	0	0	0	0	Drug Seller	0	0	1	TTBA	0	0	0		0	0	0
Midline	27	islam	Secondary & higher(9+ Class)	2	Business	2.61179	Richest	1	1	0	0	0	1	PCSBA	1	0	1	PCSBA	0	1	0	PCSBA	1	1	0
Midline	30	islam	Primary(1-5 Class)	5	DL/R/VP/TW	0.950046	Poorer	1	0	0	0	0	0	PCSBA	1	0	1	TBA	0	0	0		0	0	1
Midline	27	islam	Primary(1-5 Class)	4	DL/R/VP/TW	1.331	Poorer	1	0	0	0	0	0		0	0	0	Others	0	0	0		0	0	1
Midline	25	islam	Primary(1-5 Class)	2	DL/R/VP/TW	1.95749	Middle	1	1	0	0	0	1		0	0	1	Others	0	0	0		0	0	0
Midline	22	islam	Primary(1-5 Class)	2	Farming/Fishing/SL	1.94261	Middle	1	0	0	0	0	0	Doctor	1	0	1	TBA	0	0	0		0	0	0
Midline	25	islam	Primary(1-5 Class)	2	Business	2.96555	Richest	0	1	1	0	0	1	PCSBA	1	1	1	PCSBA	0	1	0	PCSBA	1	0	0
Midline	21	islam	Junior secondary(6-8 class)	1	Service/Overseas worker	1.92406	Middle	0	0	0	0	0	0	Doctor	1	1	0	Doctor	1	1	1	Doctor	1	0	0
Midline	26	islam	Primary(1-5 Class)	3	Farming/Fishing/SL	2.57819	Richest	1	1	0	0	0	1	PCSBA	1	0	0	TTBA	0	0	0	Drug Seller	0	0	1
Midline	22	islam	Primary(1-5 Class)	2	DL/R/VP/TW	1.19558	Poorer	0	0	0	0	0	0	PCSBA	1	0	1	TBA	0	0	0	Drug Seller	0	0	1
Midline	28	islam	Junior secondary(6-8 class)	4	Business	2.30501	Richer	1	1	0	1	1	1	PCSBA	1	0	1	Doctor	1	1	1	Nurse	1	1	0
Midline	20	islam	Junior secondary(6-8 class)	1	Service/Overseas worker	2.57983	Richest	1	1	0	0	0	1	PCSBA	1	0	1	TTBA	0	0	0		0	0	0
Midline	25	islam	Junior secondary(6-8 class)	4	Service/Overseas worker	2.19314	Richer	1	0	0	0	0	0	Doctor	1	1	1	TBA	0	0	0		0	0	0
Midline	24	islam	No formal education	5	DL/R/VP/TW	2.3983	Richer	1	1	0	1	1	1	Doctor	1	0	1	Others	0	0	1		0	0	1
Midline	23	hindu	Primary(1-5 Class)	2	Service/Overseas worker	2.3983	Richer	1	1	0	0	0	1	Doctor	1	1	0	TTBA	0	0	0		0	0	0
Midline	25	islam	Primary(1-5 Class)	3	Service/Overseas worker	3.02496	Richest	1	0	0	1	0	1		0	0	0	TTBA	0	0	0		0	0	0
Midline	33	islam	No formal education	8	DL/R/VP/TW	1.13867	Poorer	1	0	0	0	0	0		0	0	0	TTBA	0	0	0		0	0	1
Midline	35	islam	Secondary & higher(9+ Class)	4	Service/Overseas worker	2.97134	Richest	0	1	0	1	0	1	Doctor	1	1	1	Others	0	0	0	Other	0	0	1
Midline	25	islam	Junior secondary(6-8 class)	4	DL/R/VP/TW	1.66769	Middle	0	1	0	1	0	1	Doctor	1	0	1	TBA	0	0	0		0	0	1
Midline	28	islam	Junior secondary(6-8 class)	4	Business	2.59663	Richest	1	0	0	0	0	0	Doctor	1	0	0	Others	0	0	0	Nurse	1	0	0
Midline	29	hindu	No formal education	2	Farming/Fishing/SL	2.15537	Richer	0	0	0	0	0	0	Nurse	1	0	1	Others	0	0	0	Other	0	0	0
Midline	26	hindu	Primary(1-5 Class)	1	DL/R/VP/TW	2.03328	Middle	1	1	0	0	0	1	Doctor	1	0	0	TTBA	0	0	0	PCSBA	1	0	0
Midline	26	hindu	Secondary & higher(9+ Class)	2	Farming/Fishing/SL	2.81655	Richest	1	1	1	0	1	1	Doctor	1	0	0	Doctor	1	1	1	Doctor	1	1	0
Midline	19	islam	Junior secondary(6-8 class)	3	Farming/Fishing/SL	2.3983	Richer	1	0	0	0	0	0	Doctor	1	1	0	TTBA	0	0	0		0	0	0
Midline	20	islam	Junior secondary(6-8 class)	1	DL/R/VP/TW	2.6687	Richest	0	0	0	0	0	0		0	0	0	Others	0	0	0		0	0	0
Midline	30	islam	Primary(1-5 Class)	4	DL/R/VP/TW	1.13679	Poorer	1	1	0	0	0	1	Other	0	0	1	Others	0	0	0	Other	0	0	0
Midline	22	islam	Primary(1-5 Class)	1	Farming/Fishing/SL	1.95576	Middle	1	0	0	0	0	0	Nurse	1	0	0	PCSBA	0	1	1	PCSBA	1	0	0
Midline	19	islam	Junior secondary(6-8 class)	1	DL/R/VP/TW	2.50756	Richer	0	0	0	0	0	0	Nurse	1	0	0	Others	0	0	0	Drug Seller	0	0	1
Midline	40	islam	Primary(1-5 Class)	9	DL/R/VP/TW	1.91	Middle	0	1	0	1	0	1		0	0	0	TBA	0	0	0		0	0	0
Midline	27	islam	No formal education	5	Farming/Fishing/SL	1.59435	Middle	1	0	0	0	0	0		0	0	0	TBA	0	0	0		0	0	0
Midline	25	islam	No formal education	3	Others	2.22749	Richer	1	0	0	1	0	1	PCSBA	1	0	0	TBA	0	0	0		0	0	0
Midline	22	islam	Primary(1-5 Class)	1	Business	2.2844	Richer	1	1	0	0	0	1	CHCP	0	0	0	TBA	0	0	0		0	0	0
Midline	20	islam	Primary(1-5 Class)	2	Others	1.55871	Poorer	1	0	0	1	0	1	Drug Seller	0	0	0	TTBA	0	0	0	Drug Seller	0	0	1
Midline	33	islam	Primary(1-5 Class)	5	Business	1.2804	Poorer	1	1	0	0	0	1	PCSBA	1	0	0	TBA	0	0	0		0	0	0
Midline	22	hindu	Secondary & higher(9+ Class)	2	Farming/Fishing/SL	2.37159	Richer	1	1	0	0	0	1	Other	0	0	1	Nurse	1	1	0	Nurse	1	1	0
Midline	22	islam	Primary(1-5 Class)	3	Others	1.98768	Middle	1	1	0	0	0	1	PCSBA	1	0	0	PCSBA	0	1	0	PCSBA	1	0	0
Midline	27	islam	No formal education	3	DL/R/VP/TW	1.94261	Middle	1	1	0	0	0	1	Other	0	0	0	Others	0	0	0	Other	0	0	0
Midline	34	hindu	No formal education	4	DL/R/VP/TW	1.22349	Poorer	1	0	0	0	0	0	Other	0	0	1	Others	1	0	1	Doctor	1	1	0
Midline	21	islam	Primary(1-5 Class)	2	DL/R/VP/TW	1.1937	Poorer	1	1	0	0	0	1	Other	0	0	0	TTBA	0	0	0	Drug Seller	0	0	0
Midline	22	islam	Secondary & higher(9+ Class)	2	Others	2.04953	Middle	1	0	0	1	0	1	Doctor	1	0	1	TTBA	0	0	0	Doctor	1	0	1
Midline	25	islam	Secondary & higher(9+ Class)	1	DL/R/VP/TW	1.36172	Poorer	1	0	0	1	0	1	Nurse	1	0	1	Doctor	1	1	0	Doctor	1	1	0
Midline	14	islam	Junior secondary(6-8 class)	1	DL/R/VP/TW	2.46488	Richer	1	0	0	0	0	0		0	0	0	TBA	0	0	0		0	0	1
Midline	22	islam	Junior secondary(6-8 class)	3	Business	1.97588	Middle	1	0	0	0	0	0	Doctor	1	1	0	TBA	0	0	1	CHCP	1	0	0
Midline	35	islam	Primary(1-5 Class)	5	Farming/Fishing/SL	1.84654	Middle	1	1	0	0	0	1	CHCP	0	0	0	TBA	0	0	0		0	0	0
Midline	30	islam	No formal education	4	DL/R/VP/TW	1.23771	Poorer	1	0	0	0	0	0	CHCP	0	0	0	Others	1	0	0		0	0	1
Midline	20	hindu	Primary(1-5 Class)	1	DL/R/VP/TW	0.923848	Poorer	1	1	0	0	0	1	Doctor	1	0	0	Others	1	0	0	Doctor	1	0	0
Midline	28	hindu	Primary(1-5 Class)	3	DL/R/VP/TW	1.13867	Poorer	1	1	0	0	0	1	Other	0	0	1	TTBA	1	0	0	Doctor	1	1	0
Midline	20	islam	Primary(1-5 Class)	1	Farming/Fishing/SL	2.46488	Richer	1	0	0	1	0	1	Doctor	1	0	1	Doctor	1	1	1	Doctor	1	1	0
Midline	26	islam	Junior secondary(6-8 class)	3	DL/R/VP/TW	0.71023	Poorest	1	1	0	0	0	1	Doctor	1	0	0	Doctor	1	1	1	Doctor	1	1	0
Midline	22	islam	No formal education	2	DL/R/VP/TW	1.09118	Poorer	1	0	0	0	0	0	CHCP	1	0	0	Others	0	0	0		0	0	0
Midline	27	islam	No formal education	4	Farming/Fishing/SL	0.357319	Poorest	1	0	0	0	0	0	Doctor	1	0	1	TBA	0	0	0		0	0	1
Midline	27	islam	Primary(1-5 Class)	3	DL/R/VP/TW	0.616945	Poorest	1	0	0	0	0	0		0	0	0	Others	0	0	0		0	0	0
Midline	31	islam	No formal education	5	DL/R/VP/TW	0.69613	Poorest	1	1	1	0	1	1	PCSBA	1	0	0	Others	0	0	0		0	0	0
Midline	30	islam	No formal education	5	DL/R/VP/TW	2.18	Richer	1	0	0	0	0	0		0	0	0	TBA	0	0	0		0	0	0
Midline	30	islam	No formal education	6	Business	0.951761	Poorer	1	0	0	0	0	0		0	0	0	TBA	0	0	0		0	0	0
Midline	28	islam	Primary(1-5 Class)	4	DL/R/VP/TW	0.866936	Poorest	1	1	0	0	0	1	Other	0	0	1	TBA	0	0	0		0	0	0
Midline	25	islam	Primary(1-5 Class)	2	DL/R/VP/TW	1.2679	Poorer	1	1	0	0	0	1	Drug Seller	0	0	0	Others	0	0	0	Doctor	1	0	0
Midline	28	islam	No formal education	9	DL/R/VP/TW	0.967861	Poorer	1	0	0	0	0	0	Doctor	1	0	0	Others	0	0	0	Doctor	1	0	0
Midline	31	islam	Junior secondary(6-8 class)	4	Business	2.3983	Richer	1	1	0	0	0	1	Other	0	0	1	Others	0	0	0	Other	0	0	1
Midline	29	islam	Junior secondary(6-8 class)	4	Business	2.01735	Middle	1	0	1	0	0	1	Other	0	0	1	Others	0	0	0	Other	0	0	0
Midline	32	islam	No formal education	3	Service/Overseas worker	2.91951	Richest	1	0	0	0	0	0	Doctor	1	0	0	TBA	0	0	0		0	0	0
Midline	21	islam	Junior secondary(6-8 class)	1	Business	2.79683	Richest	1	0	0	0	0	0	Doctor	1	1	1	Doctor	1	1	1	Doctor	1	1	1
Midline	31	islam	Junior secondary(6-8 class)	3	Farming/Fishing/SL	2.61243	Richest	1	0	0	0	0	0	Doctor	1	1	1	Doctor	1	1	0	Doctor	1	1	0
Midline	29	islam	Primary(1-5 Class)	4	Business	2.35081	Richer	1	0	0	1	0	1	Doctor	1	0	1	TBA	0	0	0		0	0	0
Midline	35	islam	Primary(1-5 Class)	5	DL/R/VP/TW	2.35081	Richer	1	1	1	0	1	1	Doctor	1	0	1	Nurse	0	1	0	Nurse	1	1	0
Midline	28	islam	Secondary & higher(9+ Class)	2	DL/R/VP/TW	1.94265	Middle	0	1	1	1	1	1	Doctor	1	1	0	TTBA	0	0	0		0	0	0
Midline	23	islam	Secondary & higher(9+ Class)	2	Business	2.57727	Richest	1	0	0	0	0	0	Doctor	1	0	1	TTBA	0	0	1	Doctor	1	1	0
Midline	29	islam	Primary(1-5 Class)	4	DL/R/VP/TW	1.92406	Middle	1	0	0	0	0	0	Doctor	1	0	1	TTBA	0	0	0	Doctor	1	1	1
Midline	33	islam	No formal education	2	Others	0.866936	Poorest	1	0	0	0	0	0		0	0	0	TTBA	0	0	0		0	0	0
Midline	26	islam	Primary(1-5 Class)	3	Farming/Fishing/SL	0.814628	Poorest	0	0	0	0	0	0		0	0	0	TTBA	0	0	0		0	0	0
Midline	35	islam	Primary(1-5 Class)	10	DL/R/VP/TW	2.18	Richer	0	1	0	1	0	1	CHCP	0	0	0	TTBA	0	0	0		0	0	0
Midline	25	islam	Junior secondary(6-8 class)	2	DL/R/VP/TW	2.3241	Richer	1	1	1	1	1	1	Other	0	0	0	TTBA	0	0	0		0	0	0
Midline	25	islam	Secondary & higher(9+ Class)	2	Farming/Fishing/SL	2.9829	Richest	0	0	0	0	0	0	Doctor	1	0	0	PCSBA	0	1	0	Drug Seller	0	0	1
Midline	39	islam	Primary(1-5 Class)	6	Others	1.28698	Poorer	0	0	0	0	0	0		0	0	1	TTBA	0	0	0		0	0	1
Midline	27	islam	Primary(1-5 Class)	2	Farming/Fishing/SL	2.49183	Richer	1	0	0	0	0	0		0	0	0	TBA	0	0	0		0	0	0
Midline	28	islam	Primary(1-5 Class)	4	DL/R/VP/TW	1.30351	Poorer	1	0	0	0	0	0	Doctor	1	0	1	Nurse	1	1	1	Other	0	0	0
Midline	22	islam	Primary(1-5 Class)	1	Farming/Fishing/SL	1.89927	Middle	1	1	1	0	1	1	Doctor	1	0	0	Doctor	1	1	0	Doctor	1	1	0
Midline	22	islam	Primary(1-5 Class)	2	Farming/Fishing/SL	3.15238	Richest	1	0	0	0	0	0	Doctor	1	0	1	TTBA	0	0	0	Drug Seller	0	0	0
Midline	36	islam	Primary(1-5 Class)	6	DL/R/VP/TW	1.19852	Poorer	1	0	0	0	0	0	Nurse	1	0	0	Others	0	0	1	PCSBA	1	1	0
Midline	23	islam	Primary(1-5 Class)	1	Farming/Fishing/SL	2.3983	Richer	1	0	0	0	0	0	Doctor	1	0	0	Nurse	1	1	1	Nurse	1	1	0
Midline	24	islam	Primary(1-5 Class)	3	Business	1.65421	Middle	1	0	0	1	0	1	Other	0	0	0	TTBA	0	0	0	Other	0	0	0
Midline	17	islam	No formal education	1	Service/Overseas worker	2.3983	Richer	1	0	0	0	0	0	Other	0	0	1	Doctor	1	1	0	Doctor	1	1	0
Midline	21	islam	Primary(1-5 Class)	4	DL/R/VP/TW	2.3983	Richer	1	1	1	0	1	1	PCSBA	1	0	0	TTBA	0	0	1		0	0	0
Midline	37	islam	No formal education	4	Farming/Fishing/SL	1.66664	Middle	1	0	0	0	0	0	Doctor	1	0	0	TTBA	0	0	0	Other	0	0	0
Midline	33	islam	No formal education	7	DL/R/VP/TW	0.357319	Poorest	0	0	0	0	0	0	Doctor	1	0	1	TTBA	0	0	0		0	0	0
Midline	35	islam	No formal education	3	DL/R/VP/TW	1.89329	Middle	1	0	0	0	0	0	CHCP	0	0	0	TTBA	0	0	0		0	0	0
Midline	26	islam	Primary(1-5 Class)	3	DL/R/VP/TW	1.88868	Middle	0	1	0	1	0	1	PCSBA	1	0	0	PCSBA	0	1	0	PCSBA	1	1	0
Midline	28	islam	Primary(1-5 Class)	3	DL/R/VP/TW	0.458244	Poorest	1	1	0	0	0	1		0	0	0	TBA	0	0	0		0	0	0
Midline	22	islam	No formal education	3	DL/R/VP/TW	2.26117	Richer	0	1	0	0	0	0	Other	0	0	1	TTBA	0	0	1	Drug Seller	0	0	1
Midline	19	islam	Primary(1-5 Class)	1	Farming/Fishing/SL	2.6687	Richest	1	1	0	0	0	1	Other	0	0	0	Others	0	0	0	Drug Seller	0	0	0
Midline	19	islam	Primary(1-5 Class)	1	Farming/Fishing/SL	2.45521	Richer	1	0	0	0	0	0	Other	0	0	1	Others	1	0	0	Other	0	0	1
Midline	27	islam	No formal education	3	Farming/Fishing/SL	1.8642	Middle	0	0	0	0	0	0		0	0	0	TTBA	0	0	0		0	0	0
Midline	20	islam	Primary(1-5 Class)	1	Farming/Fishing/SL	2.45078	Richer	1	0	0	0	0	0	Other	0	0	1	TTBA	0	0	0		0	0	0
Midline	22	islam	Primary(1-5 Class)	2	DL/R/VP/TW	2.65354	Richest	1	1	0	0	0	1	Doctor	1	0	0	TTBA	0	0	0		0	0	0
Midline	32	islam	No formal education	11	Farming/Fishing/SL	1.66781	Middle	0	0	0	0	0	0	PCSBA	1	1	0	PCSBA	0	1	0	Drug Seller	0	0	1
Midline	30	islam	Primary(1-5 Class)	2	DL/R/VP/TW	2.35081	Richer	0	0	0	1	0	0	Nurse	1	0	0	TBA	0	0	0		0	0	1
Midline	17	islam	Secondary & higher(9+ Class)	1	DL/R/VP/TW	1.4627	Poorer	0	0	0	0	0	0	CHCP	0	0	0	TTBA	0	0	0	Nurse	1	1	1
Midline	19	islam	Primary(1-5 Class)	1	Farming/Fishing/SL	2.41739	Richer	1	1	1	0	1	1	Nurse	1	0	1	TBA	0	0	0		0	0	0
Midline	20	islam	Primary(1-5 Class)	2	DL/R/VP/TW	2.22749	Richer	1	1	0	0	0	1	PCSBA	1	0	0	TTBA	0	0	0		0	0	0
Midline	23	islam	Primary(1-5 Class)	2	DL/R/VP/TW	1.78669	Middle	1	1	0	1	1	1	PCSBA	1	0	1	TTBA	0	0	0		0	0	0
Midline	21	islam	Primary(1-5 Class)	2	DL/R/VP/TW	1.18743	Poorer	1	0	0	0	0	0	PCSBA	1	0	1	TBA	0	0	0		0	0	0
Midline	22	islam	No formal education	2	DL/R/VP/TW	2.3983	Richer	1	0	0	0	0	0	PCSBA	1	0	1	TBA	0	0	1		0	0	0
Midline	24	islam	Primary(1-5 Class)	1	Business	2.0144	Middle	1	0	0	0	0	0	Nurse	1	0	0	TTBA	0	0	0		0	0	0
Midline	25	hindu	Primary(1-5 Class)	2	DL/R/VP/TW	1.8642	Middle	1	1	0	0	0	1	Other	0	0	0	Others	0	0	0		0	0	1
Midline	30	hindu	Junior secondary(6-8 class)	3	DL/R/VP/TW	2.46985	Richer	1	0	0	1	0	1	Nurse	1	0	0	Others	0	0	0		0	0	0
Midline	27	islam	No formal education	3	DL/R/VP/TW	1.21022	Poorer	1	0	0	1	0	1		0	0	1	Others	0	0	0		0	0	0
Midline	20	islam	Junior secondary(6-8 class)	1	Business	3.06174	Richest	1	0	0	0	0	0	Nurse	1	1	0	TTBA	0	0	0		0	0	0
Midline	30	islam	Primary(1-5 Class)	3	Business	2.54856	Richer	0	0	0	0	0	0	Doctor	1	0	1	Nurse	1	1	0	Nurse	1	1	0
Midline	26	islam	Junior secondary(6-8 class)	3	Farming/Fishing/SL	2.3983	Richer	1	0	0	0	0	0		0	0	0	TTBA	0	0	0	Drug Seller	0	0	0
Midline	19	islam	Primary(1-5 Class)	1	Business	2.45521	Richer	0	0	0	0	0	0	PCSBA	1	0	0	PCSBA	0	1	0		0	0	0
Midline	26	hindu	Primary(1-5 Class)	1	Farming/Fishing/SL	2.44841	Richer	0	0	0	0	0	0	Other	0	0	0	TBA	0	0	0		0	0	0
Midline	21	hindu	Primary(1-5 Class)	2	Service/Overseas worker	1.25609	Poorer	0	0	0	0	0	0		0	0	0	TTBA	0	0	0		0	0	0
Midline	43	hindu	Primary(1-5 Class)	7	Farming/Fishing/SL	2.21301	Richer	0	0	0	0	0	0	Doctor	1	1	1	Others	0	0	0		0	0	0
Midline	18	hindu	No formal education	1	Service/Overseas worker	2.01735	Middle	0	0	0	0	0	0	Other	0	0	0	Nurse	1	1	1		0	0	0
Midline	23	islam	Secondary & higher(9+ Class)	1	Service/Overseas worker	3.31658	Richest	1	0	0	1	0	1	Doctor	1	0	0	TTBA	0	0	0	Drug Seller	0	0	0
Midline	20	islam	Secondary & higher(9+ Class)	1	Service/Overseas worker	3.44069	Richest	1	1	0	0	0	1	Doctor	1	1	0	Nurse	1	1	0	Doctor	1	1	0
[truncated: 235 more rows]

## Sheet: description
List of Variables	Description
survey	Study Group
age	Age in years
religion	Religion
education	Education Status
para	Number of Para
h_occupation	Husband Occupation
wealth_score	Wealth index score
wealth_group	Wealth quintile
decided_delivery_place	Decided about place of delivery
Saved_money	Saved money
emergency_transport	Prepared emergency transport
safe_delivery_kit	Collected safe delivery kit
birth_preparedness_3	Women who took at least 2 of the initiatives as part of birth preparedness
birth_preparedness_2	Women who took at least 3 of the initiatives as part of birth preparedness
anc_providor	Type of ANC provider
skill_anc_1	Received ≥1 ANC check from skilled provider at last pregnancy
skill_anc_4	Received ≥4 ANC checks from skilled provider at last pregnancy
anc_complication	Prenatal complications at last pregnancy
delivery_providor	Type of childbirth attendant
delivery_facility	Facility delivery at last birth
skill_delivery	Skilled attendance at last birth (includes institutional deliveries and home deliveries with skilled health personnel)
del_complication	Labor and delivery complications at last birth
pnc_providor	Type of PNC provider
skill_pnc_1	Received PNC check from skilled provider at last birth
skill_pnc_24h	Received PNC check from skilled provider within 24 hours of last birth
pnc_complication	Postnatal complications at last birth
